# Supplementary material for: De novo Transcriptome Reveals Gene Changes in the Development of the Endosperm Chalazal Haustorium in Taxillus chinensis (DC.) Danser
Source: Biomed Res Int. 2020 Feb 18;2020:7871918. doi: 10.1155/2020/7871918 (PMC7053452; doi:10.1155/2020/7871918)
Supplement: Supplementary 1 — Table S1. miRNA host genes and sequences. [file 7871918.f1.xls]

mir_fam	location	mfe	seq	struct	seq(5p)	seq(3p)
miR156a	TRINITY_DN2184_c0_g1:747:895:-	-64.4	AAAGGGGGTTTGACAGAAGAGAGTGAGCACACATGGTGGTTTTCTGCATGCTTTAAAGTTTTCGACTATTCGGTGGCGGTTGTGGTGTGGATGTTCATGCCGGAAGCTATGCGTGCTCACTCTCTATCTGTCAGGCCGTTGGTCTCTGC	...((.((((((((((((((((((((((((.((((((......((((..(((....((((...))))....))).))))((.((((((((....)))))))).)))))))).))))))))))))).))))))))))).)).........	TGACAGAAGAGAGTGAGCACA	TGCTCACTCTCTATCTGTCAGG
miR156b	TRINITY_DN2184_c0_g2:382:527:+	-67.1	GAAAGGGGGTTTGACAGAAGAGAGTGAGCACACATGGTGGTTTTCTGCATGCTTTAAAGTTTTCGACTATTCGGTGGCGGTTGTGGTGTGGATGTTCATGCCGGAAGCTATGCGTGCTCACTCTCTATCTGTCAGGCCGTTGGTCT	((..((.((((((((((((((((((((((((.((((((......((((..(((....((((...))))....))).))))((.((((((((....)))))))).)))))))).))))))))))))).))))))))))).))..)).	TTGACAGAAGAGAGTGAGCAC	-
miR156c	TRINITY_DN4011_c3_g1:112:272:+	-58.8	GGTGGTGTCATCTGACAGAAGAGAGTGAGCACACAAAGGGGAATATGTATGACTTCTGCTGCAACATACATGGACGATGGATGATGAATGATGATGATGATGATGTATAATATGCATATTGTTTTTGCGTGCTCACCCTCTTCCTGTCAGAGTTTCTACCT	(((((.....(((((((((((((.((((((((.((((((..((((((((((((.((.....((.(((.(((................)))))).)).....)).))....)))))))))).)))))).)))))))).))))).))))))))....))))).	TCTGACAGAAGAGAGTGAGCAC	-
miR157	TRINITY_DN97440_c0_g2:246:347:+	-37	AAAAGTGTTGTTGACAGAAGATAGAGAGCACTGAAGATCATGAAATGCATTTGGGTTGGCATCTCACTCTTGTGTACTCTCTAACTTCTGTCATCACCTTTA	.((((.((.(.(((((((((.(((((((.((..((((...(((.((((..........)))).))).))))..)).))))))).))))))))).))))))).	TTGACAGAAGATAGAGAGCAC	-
miR159	TRINITY_DN5903_c0_g1:521:711:+	-89.9	CAAGGTATCTGAGGAGCTCCTTTTTGTCCAAAAGAGGTTGTTGCTGGGTGGATTGAGCTGCTGGTATATGGATCCCACACTCCTATTGTTTTCTATCTCTGACGATAGGCTTGTGGCTTGCATATCTCAGGAGCTGGCATCACCCTTGGTTCCACCCTTCTTTGGATTGAAGGGAGCTCTTCACTTCCTCA	..(((....(((((((((((((((.(((((((.((((.((..(((((((((....((((.((((.(((((.(..(((((..(((((((((..........)))))))))..)))))..).))))).)))).))))....))))))..)))..)).)))).))))))).)))))))))))))))...)))..	-	TTTGGATTGAAGGGAGCTCTT
miR160a	TRINITY_DN62231_c0_g2:1:89:-	-41	CTTACTCCATGCCTGGCTCCCTGTATGCCATACAAAGAGCCCACCGGCAGATCGATGGCCTCCGTGGATGGCGTATGAGGAGCCATGCA	.........(((.(((((((.(((((((((..((..(((.(((.((......)).))).)))..))..))))))))).))))))).)))	GCCTGGCTCCCTGTATGCCAT	-
miR160b	TRINITY_DN62231_c1_g1:352:473:+	-51.3	ATTTAGGTTGGCACACTCTATGCCTGGCTCCCTGTATGCCATATGCTGAGCCCACCGGCGAGTCGATGGCCTCCGCGGATGGCGTATGAGGAGCCATGCATATTCCATGTGTAATTTTTGGA	.((((((...(((((...(((((.(((((((.((((((((((.(((.(((.(((.((......)).))).))).))).)))))))))).))))))).))))).....)))))....))))))	TGCCTGGCTCCCTGTATGCCA	GCGTATGAGGAGCCATGCATA
miR162	TRINITY_DN809_c0_g1:349:471:+	-56.4	TGGATTGAGGCTGAGGTTGCTGGAGGCAGCGGTTCATCGATCTTTTCATGACTGTTATTGAGATGAACATGTCGTGGACTGATCGATAAACCTCTGCATCCAGCAGCTGATCAATTTTGTTTC	.(((((((......((((((((((.((((.((((.(((((((..((((((((((((.........)))).))))))))..))))))).)))).)))).))))))))))..)))))))......	TGGAGGCAGCGGTTCATCGATC	TCGATAAACCTCTGCATCCAG
miR166a	TRINITY_DN16370_c0_g1:36:172:+	-60.3	CTCTAACTGACTAGTTGAGGGGAATGTTGTCTGGTTCGAGATCATTCATATTCACATGAATGTATGAAACTAATTACTTGGGTAATCTGGATGATTTCGGACCAGGCTTCATTCCCCCCAACTATGGAGAAAAAATT	(((((......((((((.((((((((..(((((((((((((((((((((((((....)))))).........(((((....)))))..)))))))))))))))))))..)))))))).)))))))))))........	GGAATGTTGTCTGGTTCGAGA	TCGGACCAGGCTTCATTCCCC
miR166b	TRINITY_DN3002_c0_g1:1025:1395:-	-105.7	AATGGAGTGGGGGCGGGCCAGCATCCTGGTGGTCTTGTCTTGCACATTTCTAGGGTTTGTTTGCGTGCTTTGAGCTCTCCCTCTCTCTCTCTCTCCCCTCTCTACTCGGACCTCAGTCCTGGGTTCTGTTCTTCATCACATCCTCTGTCGTTCCACTTTTTCTCTCTCCGATGGAAATCCCAATTTCATCGCTGCCCTCAGCATGATTTGCGTGATTGTTTCCAAAACCCACATGGATACCTTGATTTCACCATCGTCCCTGATATGATATCGATGTGATTTTAGGGACTCGCAGGTCGGAGGCCATTAGCTAGAGAATCAGGAAGCTTCTTCGTTGCGGGGAATGTTGTCTGGTTCGAAGCCACTTTGGA	..(((((.(((((((.((.((((((((((.(((..(((...))).))).))))))..)))).)).)))...(((......)))...........)))).)))))(((.((((((.((((((((((.((......(((((....(((((((..................))))))).....(((..((((.((((....)))))))).))).)))))......)).))))))...)))).....(((......)))((((((((.((.(((....))).)).))))))))..).))))).))).(((...(((...((((((((.((((((((((...))))))).))).))))))))..))).....))).	-	GAATGTTGTCTGGTTCGAAG
miR166c	TRINITY_DN3187_c0_g1:462:682:+	-86.7	TGAAGCTTTGTTTTTTGAGGGGAATGTTGTCTGGCTCGAGGCCACAAACTGTAGATCTAAATATTAGTGGACTCAATCATCTAATATCTTTTATGGATCTCGGTGATTGAATCCCTGATTTCACGGTTACATAGATCCATCGATACTATATTGACTGGTGGAGGATCGCGAGTTAGCGACCTCGGACCAGGCTTCATTCCCCCCAATTATTAAGCTTCTGT	.(((((((......(((.((((((((..((((((.((((((.(.(.((((...(((((....(((((.(((.(((((((((....((((.....))))...))))))))).))))))))((((((((((.(((((((....))).))))..))))).))))))))))...)))).).).)))))).))))))..)))))))).))).....)))))))...	GGAATGTTGTCTGGCTCGAGG	CTCGGACCAGGCTTCATTCCC
miR166d	TRINITY_DN6499_c1_g1:784:989:-	-80.4	TCGGTTCAGAGGAATGTTGTCTGGCCTGAGGTCATGGAGGAGCTGCATGTATGGTGGTGATCCAACCGGGTCATCATCCACATCATCATTCATGTGTGTCGGATCTATATATGTTCCATATAAATGAACATACGCTCATACACACGTGACATAAGCATATGAGGGCCTAAATGATTCTCGGACCAGGCTTCATTCCCCTCAACCAA	..((((.((.((((((..((((((.((((((((((..(((..((.(((((.((((((((((((....))))))))).))).........((((((((((..((......(((((((.........)))))))...))..)))))))))).......)))))))..)))..)))).)))))).))))))..)))))).)).))))..	GGAATGTTGTCTGGCCTGAGG	TCGGACCAGGCTTCATTCCCC
miR166e	TRINITY_DN7636_c0_g1:656:793:+	-58.9	ATGGAAGGGTCTGTTTGAGGGGAATGTTGGCTGGCTCGAGGCATTCACTTCTTCATTTAACTGAAGAGATGAAAGGTGAATTGAACAGTGAAGATCGTCTCGGACCAGGCTTCATTCCTTTCAAACTTGTTCTTCCTT	..(((((((...((((((((((((((..(.((((.(((((((((((((((.(((((((........)))))))))))))))...............))))))).)))).)..))))))))))))))...)))))))..	GGAATGTTGGCTGGCTCGAGG	TCTCGGACCAGGCTTCATTCC
miR166f	TRINITY_DN78345_c0_g1:58:169:+	-50.7	TGCGTTGAAGAGTTGAGGGGAATGCAGCTTGGTTCGAGGCCAATCAGTTTGAAGGCAAGACTACTTATTTAATTTGAATGATCTCGGACCAGGCTTCATTCCCCCCAACGCC	.((((((.......(.((((((((.((((((((((((((.((.((((.(((((...(((....))).))))).)))).)).)))))))))))))).))))))))))))))).	-	TCTCGGACCAGGCTTCATTCC
miR169	TRINITY_DN52513_c0_g1:320:448:-	-56.6	GAGTGCAATTCAGCCAAGGATGATTTGCCGGCTCTCTCTCTCTCTATATATATATATATGAGCTTGCTGCATGCATGCATGCTATGTATATATTGTGTCGGCAAATTGTCCTTGGCTACACTGGGCTCT	((((.((....(((((((((((((((((((((.................((((((((((.(((.(((((....)).))).)))))))))))))...)))))))))))))))))))))....)).)))).	CAGCCAAGGATGATTTGCCGG	-
miR172a	TRINITY_DN4288_c2_g1:439:596:+	-59.7	ACCAGCCACTGTTGGCCGATGCTGCATCATCAAGATTCACAAAACGAGAAGAGAGCAATCCCTTTCCCTCATCCTTATATAATTTATGTAAGGGAACTCTTTGATTTTGACAAATTGAGAATCTTGATGATGCTGCAGCGGCAATCAATGGCTAATTT	...(((((.((...((((.(((.(((((((((((((((.(((...(((..(((((......))))).)))..(((((((((...)))))))))......((((.......))))))).))))))))))))))).))).))))...)).))))).....	GCTGCATCATCAAGATTCAC	GAGAATCTTGATGATGCTGCAG
miR172b	TRINITY_DN95131_c0_g1:598:759:+	-78.4	TGCAGTCGCTGTTTGCTGGCGTGGCATCATCAAGATTCACATCCGTGTATCCAAATAAATGCTACAACCCCCGCCGGCTTGGCTTGGTTTGGTTTGGTTTGGGTTGGGCGTGTCGATGATGAGAATCTTGATGATGCTGCATCGGCGAACCAGCGACTATGT	...((((((((((((((((.((((((((((((((((((.(((((((.(((((((((....((((.((((...(((.....)))..))))))))...))))))).)).))).......)))).)))))))))))))))))).)))))))).))))))))....	GTGGCATCATCAAGATTCACA	TGAGAATCTTGATGATGCTGCAT
miR2673	TRINITY_DN29820_c0_g1:520:636:-	-21.6	TCTTCCTCTTCCTCTTCCTCTTCCTCTTCCACTTCCACTTCCACTTCCATTGATTGATTCGCTGTTGGGTGTTTTGAGGATGAAGACAGGACCAAGACATCTTCAACATTGGATGAA	......((((..((((..(((((.(((((.((.((((........((........))........)))).))...))))).))))).))))..))))(((((........)))))..	CCTCTTCCTCTTCCTCTTCCAC	-
miR319a	TRINITY_DN111248_c0_g1:21:264:-	-114.6	TGCGTAGAATATCAGGGAGCTTTCTTCAGTCCAGCGCAAGGCGGGTACTGAGGTCGAAACGTGGCTGCTGACTCGTTGCTTCAAGACCTCATCATCGTTCCTGACGTATACATACATTAACACTACTAGGTATGTACGAGAGAGAGAAAGATGAGGTGATGTGTTTTTGAGGGAACGATGCAGGAGCTGCGTCCGGCTGCCACCGTCACGCCTTGGACTGAAGGGAGCTCCCTGTGGCTACACC	...((((.....((((((((((((((((((((((.((..(((((.......(((((..((((((((.(((..(((((.(((((((((((((((....(((((..(((..((((((.(((.......))))))))))))..)).)))...))))))))........))))))).)))))..))).)))))))).)))))....)))))..)).))))))))))))))))))))))...))))...	-	TGGACTGAAGGGAGCTCCCTG
miR319b	TRINITY_DN2999_c1_g2:143:379:+	-90.3	CATGAGTATGGCAGCAAAAGAGAGCTTTCTTCAGTCCACTCACGGGAGGTCAAGGGATTTTATTAGCTGCCGACTCATTCATCCAAATACTGCGTTAATGAATTCCTAAAAAGAAAGTTTATCAGAGGTAGAGAGCACACGGACCCAGTAAATGAGTGAATGATGCGGCAGATAAATTCGATCCTAGGTTTTCTGTGCTTGGACTGAAGGGAGCTCCCTTCCCTGTCTTCTTACTCT	...(((((.(((((...(((.(((((((((((((((((..(((((((((.(..((((((..(((.(((((((..((((((((.((..(((((.(((..((..((((((....((.......)).....))).)))..))..))).)))))..)).))))))))..)))))).).)))..))))))..))))))))))..))))))))))))))))).)))..)))))....))))).	AGAGCTTTCTTCAGTCCACTC	GCTTGGACTGAAGGGAGCTCC
miR390	TRINITY_DN26389_c0_g1:110:207:-	-48.6	GGGAGAATCCGTAAAGCTCAGGAAGGATAGCGCCAATACATGTATAACAATACACATCAACTGTTGGCGCTATCCATCCTGGGTTTCATTGGTTCTTC	.((((((((.((.((((((((((.((((((((((((((..(((((....))))).......)))))))))))))).)))))))))).)).))))))))	-	CGCTATCCATCCTGGGTTTCA
miR393a	TRINITY_DN14210_c0_g1:1048:1259:-	-68.9	TCTTGGTGCAGGTGGAGAGTTCCAAAGGGATCGCATTGATCCGACATGTTTACATGCATAATAGTACTGATCATATCACACACACTCTCTCTCTCTCTCTCTCTCTCTCTCTCACACACACACACACACACTGTATATATATACAAATCTTTAAGGTTCACTAAATGTCGGATCATGCGATCCCTTGGGAAGTCTCCATCCGGGCCTTCAAA	....(((.(.((((((((.((((.((((((((((((.((((((((((.......(((......))).((((...)))).....................................................(((((....)))))(((((...)))))......)))))))))))))))))))))).)))).)))))))).).)))......	TCCAAAGGGATCGCATTGATCC	ATCATGCGATCCCTTGGGAAG
miR393b	TRINITY_DN3433_c2_g1:212:332:+	-61.9	CCGGTGGAGAACTCCAAAGGGATCGCATTGATCCGATGATGTTTGAGTTGTGTGTGCATCGAATGAATCGAGAGTGCCCTCCTCGATCGGATCATGCGATCCCTTCGGAATTTTCCATCGA	.((((((((((.(((.((((((((((((.(((((((......(((((..(.(.((((.((((.....))))..))))))..)))))))))))))))))))))))).))).)))))))))).	ACTCCAAAGGGATCGCATTGA	-
miR394	TRINITY_DN8625_c0_g1:2446:2613:-	-57.4	AGCGTTTTGTACGGAGCTTATTGGCATTCTGTCCACCTCTCTGTCCGTTTTACTTACCCTTATGTGTGTATATGCGTGGCATGAACGTCGATCCATGTGGTGTATATTGGTACTGGTATACGTACGGAGGTGGGCATACTGCCAACAGAGCTGCGTTGGATTCTCTTT	((.(..((..(((.(((((.((((((...(((((((((((..((.(((..((((((((.......((((((((((((((.((........)))))))).)))))))).))))..)))).))).)))))))))))))...))))))..))))).)))..))..).))..	TTGGCATTCTGTCCACCTCTCT	AGGTGGGCATACTGCCAACAG
miR396a	TRINITY_DN1198_c1_g1:117:211:+	-26.2	TTTGAGTGCGATGAAAGGTCAGATCGGTGTACGGCTCTGGAGGAGGATGGTCCTATTCGTGTTCTTCCACAGCTTTCTTGAACTGCGGCTCTTAA	.(((((.((..........(((.((((.(...((((.((((((((.((((......)))).)))))))).))))..))))).)))..)).)))))	-	TTCCACAGCTTTCTTGAACTG
miR396b	TRINITY_DN2763_c7_g1:125:251:-	-54.6	CTGGCCGTGCTTTTCCACAGCTTTCTTGAACTTTCTTTCCCCTGCTTGACACTTGATGAGATCTCTCCACCTACGTCAAACAATTCTTAAAAGAAAGCTCAAGAAAGCTGTGGGAAGACATGGCGAT	.(.((((((.(((((((((((((((((((.((((((((....((.(((((.......(((....))).......))))).)).......)))))))).))))))))))))))))))).)))))).).	TTCCACAGCTTTCTTGAACT	CTCAAGAAAGCTGTGGGAAG
miR398	TRINITY_DN36042_c0_g1:310:436:-	-51.3	GGAGAATCCTACAGGGTCTACCTGAGATCACATGAGAGCACCACTACTGGTACCTCCTAAGAGAACGCACACGAGTAGTGCTCAGGATATGCAAGATGTGTTCTCAGGTCGCCCCTGCGGGGCTCTC	.((((.((((.(((((.(.((((((((.(((((..((((((.(((..((((..(((....)))...)).))..))).))))))............))))).)))))))).).))))).)))).))))	-	TGTGTTCTCAGGTCGCCCCTG
miR408	TRINITY_DN24664_c0_g1:34:151:+	-45.5	AAGGAAGGTATTTACAAAGACAGGGAAAGAGGCCGGGCATGAAGGAATTTCACTTAACAGATAAAGGGTGCTGTTGATGATTCCCCCATGCACTGCCTCTTCCCTGGCTTTCTTCTCT	..((((((........(((.(((((((.(((((.(((((((..((((..(((.(((((((((.....)).))))))))))))))..))))).)))))))))))))).)))))))))..	-	ATGCACTGCCTCTTCCCTGGC
miR530	TRINITY_DN114903_c0_g1:42:203:-	-54	ACACCACCCGAGGTGCAGGTGCAGGCGGTGCAGGGCCTCATCGGGCGGCTGCTTGGCGCCACCTACGTGCCCCTCTTCCAGCTCTCCATCCTGCCCTCCCCTTACGCAAGCTCCACCGACCACGACCACTACGCCCTCTCCACTCGCACGGTGGGAGGAGTG	.........((((.(((((((.((((((...((((...(((.(((.(((.((...))))).)))..))).))))...)).)).)).)).))))))))).................................(((((((.(((((.....))))))))).)))	AGGTGCAGGTGCAGGCGGTGC	-
miR7543	TRINITY_DN123932_c0_g1:48:394:-	-77.5	TTCCTTTTGTGTTAATCAAATTATTACCATTAGAAGGTCTCTTGGCTGGTGATTCAAACAAAGATATGTTAAAAAATTATAATGGGATTCTTATAAATGGGTTGGATTATCTAGTTGTACTTTTGTGGGTTTATAGAACTTGATTCGCAAAAGGATAGTGTAGTATAGGATGCATTATTCTAAACCAACCTGGTAAGTGATGGATTCTTTACATCACCACATGCTATTTTTTAAGAGCATTATTGGGAATAACAAGAAGTCGTCTCAAATTTTTTGAAGCACTCTTCGCAATGTTATTGAGTGGCAGTATGAGGTTTTTAATGATACATGATTAACTCTGAAGTGGT	.((((((.(.((((((((...(((...(((((((((..(((...((((.(.(((((((((((((....((((((((((....((((((.(((......(((((((.(((..........((((((((((((..........))))))))))))(((((((((........))))))))).))).))))))).....((((((.........))))))...(((((.((....)).)))))..(((.......))).)))..)))))))))))))))).....)))).....)))..)))))).)))))..))).))))))))))))..)))))))).).)))).)).	-	TTAATGATACATGATTAACT
miR838	TRINITY_DN45164_c0_g1:11:98:-	-18.6	TTTTTGCCCGTTTTCTTCTTCTTTTTGCACTCCAGTTCATCATCATTTACAACATTTGGATAGAAGGACCAAGAAAACGATGAGGAGG	(((((...(((((((((..((((((((...(((((....................)))))))))))))..)))))))))...))))).	TTTTCTTCTTCTTTTTGCACT	-
