# Supplementary material for: De novo Transcriptome Reveals Gene Changes in the Development of the Endosperm Chalazal Haustorium in Taxillus chinensis (DC.) Danser
Source: Biomed Res Int. 2020 Feb 18;2020:7871918. doi: 10.1155/2020/7871918 (PMC7053452; doi:10.1155/2020/7871918)
Supplement: Supplementary 2 — Table S2: dysregulated genes identified in FB and FD compared to CK. [file 7871918.f2.xls]

gene_id	FB_vs_CK(logFC)	FB_vs_CK(FDR)	FB_vs_CK(regulation)	FD_vs_CK(logFC)	FD_vs_CK(FDR)	FD_vs_CK(regulation)	FD_vs_FB(logFC)	FD_vs_FB(FDR)	FD_vs_FB(regulation)	prot_name	description
TRINITY_DN1621_c0_g1	1.374122323	0.001843484	UP	1.216025154	0.006735281	UP	-0.167606544	1	NC	LQY1_ARATH	Protein disulfide-isomerase LQY1
TRINITY_DN15306_c0_g1	1.129182503	0.018820316	UP	0.785480183	0.141922408	NC	-0.353937441	1	NC	UBC8_ARATH	Ubiquitin-conjugating enzyme E2 8
TRINITY_DN1508_c4_g1	2.127631809	2.45E-06	UP	1.214861434	0.01334174	NC	-0.922663447	0.11765199	NC
TRINITY_DN1615_c1_g1	1.783833744	4.30E-05	UP	1.727288556	7.48E-05	UP	-0.066134442	1	NC	BAME1_ARATH	Leucine-rich repeat receptor-like serine/threonine-protein kinase BAM1
TRINITY_DN6487_c0_g1	11.22437238	1.04E-32	UP	10.16215707	1.61E-25	UP	-1.106007121	0.03490946	DOWN
TRINITY_DN6520_c1_g1	-2.536713329	1.25E-08	DOWN	1.725110288	5.91E-05	UP	4.25449212	9.82E-21	UP
TRINITY_DN26092_c0_g1	1.341966938	0.002394165	UP	1.782150958	3.03E-05	UP	0.430651464	0.890354905	NC
TRINITY_DN2435_c0_g2	-1.196305744	0.008953409	DOWN	-1.396970269	0.00177684	DOWN	-0.209416538	1	NC
TRINITY_DN176_c0_g1	0.461096438	0.439468146	NC	1.149488272	0.010553816	UP	0.679073908	0.383519134	NC	RHDF1_DANRE	Inactive rhomboid protein 1
TRINITY_DN23228_c0_g1	1.303646272	0.002835924	UP	1.667994907	8.21E-05	UP	0.355085761	1	NC
TRINITY_DN17005_c0_g1	-1.152192339	0.013281604	DOWN	-0.713283538	0.174553426	NC	0.429454184	0.91722328	NC
TRINITY_DN5425_c1_g1	1.026775179	0.029004676	UP	1.133417823	0.013433945	UP	0.096816176	1	NC
TRINITY_DN16029_c0_g1	-1.509592104	0.000477364	DOWN	-1.689509144	7.45E-05	DOWN	-0.189294572	1	NC
TRINITY_DN1594_c0_g1	-1.481161796	0.000574833	DOWN	-0.687850938	0.17849594	NC	0.784139662	0.227400134	NC	EP1G_DAUCA	Epidermis-specific secreted glycoprotein EP1
TRINITY_DN15384_c0_g1	0.887000032	0.064475178	NC	1.150333667	0.010444072	UP	0.254011379	1	NC	ASPG2_ARATH	Protein ASPARTIC PROTEASE IN GUARD CELL 2
TRINITY_DN5078_c0_g2	-1.652537522	0.000125725	DOWN	-0.551233464	0.322991272	NC	1.092225426	0.035496842	UP	UPL3_ARATH	E3 ubiquitin-protein ligase UPL3
TRINITY_DN12553_c1_g1	1.431814111	0.001387206	UP	1.141945759	0.013813459	UP	-0.299484393	1	NC
TRINITY_DN6382_c0_g2	-1.179290049	0.011120965	DOWN	-1.730620566	8.88E-05	DOWN	-0.560946341	0.666579388	NC	POLX_TOBAC	Retrovirus-related Pol polyprotein from transposon TNT 1-94
TRINITY_DN3291_c0_g1	-1.191152264	0.008987831	DOWN	-1.205408655	0.007716643	DOWN	-0.02399868	1	NC
TRINITY_DN9407_c0_g1	1.148578094	0.015900598	UP	1.226001389	0.008844367	UP	0.067838785	1	NC
TRINITY_DN148480_c0_g1	2.357552683	5.66E-08	UP	1.890015332	1.61E-05	UP	-0.477455708	0.799278529	NC
TRINITY_DN9314_c0_g1	-8.425814278	2.32E-56	DOWN	-1.129270073	0.011379482	DOWN	7.287340036	1.40E-46	UP	ML2_VISAL	Beta-galactoside-specific lectin 2
TRINITY_DN2951_c1_g1	-0.549738941	0.333336751	NC	-1.128179415	0.014059466	DOWN	-0.588011795	0.581493788	NC
TRINITY_DN8390_c0_g1	1.200697658	0.009896093	UP	1.228225194	0.007597355	UP	0.017979379	1	NC	RDR1_ARATH	RNA-dependent RNA polymerase 1
TRINITY_DN6264_c1_g1	-2.226699314	5.40E-07	DOWN	-10.82275954	6.77E-34	DOWN	-8.980460704	1.60E-20	NC
TRINITY_DN9792_c0_g1	1.682434178	0.000202007	UP	1.007458094	0.043375909	NC	-0.686114761	0.397097929	NC	PTR18_ARATH	Protein NRT1/ PTR FAMILY 3.1
TRINITY_DN44040_c0_g1	-1.369883584	0.007759661	NC	0.946480955	0.044762418	NC	2.307523495	5.85E-07	UP
TRINITY_DN13100_c2_g1	0	1	NC	10.42538421	1.15E-26	UP	10.79904548	1.12E-34	UP	RS26_NEUCR	40S ribosomal protein S26E
TRINITY_DN24821_c1_g1	1.126693702	0.012307132	UP	0.757661585	0.127994918	NC	-0.378483132	0.985478861	NC	RK24_TOBAC	50S ribosomal protein L24, chloroplastic
TRINITY_DN22165_c0_g1	0.59909147	0.266666059	NC	-1.967059182	3.06E-06	DOWN	-2.575765649	1.91E-09	DOWN
TRINITY_DN11237_c0_g1	3.73001563	9.91E-14	UP	3.059320571	1.60E-09	NC	-0.681688372	0.416253992	NC
TRINITY_DN18888_c0_g1	-1.012932795	0.062099965	NC	1.390101885	0.003667117	UP	2.395628966	1.76E-07	UP
TRINITY_DN2647_c0_g1	1.218278086	0.006193344	UP	0.989892308	0.032542245	NC	-0.23793942	1	NC	RGA4_SOLBU	Putative disease resistance protein RGA4
TRINITY_DN7676_c0_g1	-2.77718104	3.72E-10	DOWN	-1.432152448	0.001447066	DOWN	1.338420337	0.008611014	NC
TRINITY_DN9570_c0_g1	10.2248285	8.72E-26	UP	9.551842481	6.26E-21	NC	-0.716699212	0.361484903	NC	EF1B_SCHPO	Elongation factor 1-beta
TRINITY_DN453_c0_g1	3.09010156	3.53E-13	UP	3.076601995	3.80E-13	UP	-0.023058225	1	NC
TRINITY_DN19405_c0_g1	0	1	NC	10.33943936	5.22E-26	UP	3.48034997	1.78E-13	UP	NHP2_YEAST	H/ACA ribonucleoprotein complex subunit 2
TRINITY_DN1017_c3_g1	-5.562051096	4.90E-30	DOWN	-5.09794574	2.94E-27	DOWN	0.454498425	0.972459866	NC
TRINITY_DN11433_c0_g1	-0.286242778	0.687097775	NC	1.250760233	0.004902915	UP	1.527676111	0.000857701	UP	WAKLG_ARATH	Wall-associated receptor kinase-like 8
TRINITY_DN2039_c3_g1	-2.114130396	1.70E-06	DOWN	-0.824248737	0.10171712	NC	1.281232266	0.012549266	NC
TRINITY_DN18897_c0_g1	0	1	NC	11.78859552	1.05E-37	UP	12.16358999	9.77E-46	UP	PLY_ZINVI	Pectate lyase
TRINITY_DN10300_c0_g1	-2.966680637	1.35E-11	DOWN	-2.149521702	5.78E-07	DOWN	0.808120378	0.255214188	NC
TRINITY_DN1300_c2_g1	-0.526193677	0.366236838	NC	0.839698754	0.090348252	NC	1.356433253	0.004631645	UP
TRINITY_DN8460_c0_g1	1.384544523	0.002267649	UP	0.976531736	0.046166848	NC	-0.417474662	0.924845573	NC	Y4885_ARATH	Probable LRR receptor-like serine/threonine-protein kinase At4g08850
TRINITY_DN1016_c2_g1	-0.88692489	0.06421728	NC	0.645073842	0.219971575	NC	1.522545644	0.000857701	UP	XERIC_ARATH	Probable E3 ubiquitin-protein ligase XERICO
TRINITY_DN10422_c0_g1	0	1	NC	11.21541626	5.44E-33	UP	11.59077262	4.90E-41	UP	AG19_COCPS	Heat-stable 19 kDa antigen
TRINITY_DN14602_c0_g1	1.960914015	6.55E-06	UP	1.93105551	8.95E-06	UP	-0.039782222	1	NC	C76B6_CATRO	Geraniol 8-hydroxylase
TRINITY_DN7415_c1_g3	0	1	NC	11.60854431	3.26E-36	UP	4.125271307	5.43E-19	UP	Y2309_ARATH	Uncharacterized protein At2g23090
TRINITY_DN6432_c1_g1	0	1	NC	10.43116743	1.03E-26	UP	3.373026022	5.16E-13	UP	RL28_NEUCR	60S ribosomal protein L28
TRINITY_DN147_c2_g1	2.120889211	8.93E-07	UP	1.987810288	4.21E-06	UP	-0.142706002	1	NC	LRP1_ARATH	Protein LATERAL ROOT PRIMORDIUM 1
TRINITY_DN13155_c0_g1	0	1	NC	10.4453342	7.80E-27	UP	4.505374087	1.58E-19	UP	MET10_YEAST	Sulfite reductase [NADPH] flavoprotein component
TRINITY_DN8592_c2_g1	2.284944111	1.84E-07	UP	2.783395359	1.80E-10	UP	0.488774204	0.77280217	NC	CYSEP_VIGMU	Vignain
TRINITY_DN4848_c0_g1	1.299610224	0.004941674	UP	1.398968082	0.00222877	UP	0.089480408	1	NC
TRINITY_DN15569_c0_g1	0.394137421	0.531433095	NC	-0.89911502	0.058514103	NC	-1.302812622	0.006520758	DOWN
TRINITY_DN10725_c0_g1	10.64831033	4.64E-29	UP	10.18044415	1.17E-25	UP	-0.51132101	0.7447988	NC	HSPC4_RICFE	Small heat shock protein C4
TRINITY_DN2042_c1_g1	-3.300319663	1.99E-14	DOWN	-2.693891839	1.93E-10	DOWN	0.597030782	0.560265815	NC	CBSX5_ARATH	CBS domain-containing protein CBSX5
TRINITY_DN3200_c0_g2	-1.268688685	0.004649402	DOWN	0.164081762	0.837952615	NC	1.423158094	0.002484285	UP
TRINITY_DN4518_c0_g1	4.243465783	8.35E-19	UP	2.758457923	7.74E-09	NC	-1.495712683	0.001379062	DOWN	SAG12_ARATH	Senescence-specific cysteine protease SAG12 {ECO:0000305}
TRINITY_DN5961_c0_g1	1.280147098	0.004896657	UP	1.084063768	0.020424929	UP	-0.205566705	1	NC	TOPB1_MOUSE	DNA topoisomerase 2-binding protein 1
TRINITY_DN5079_c0_g2	1.014026905	0.029820125	UP	0.493019246	0.399624416	NC	-0.530845151	0.679236092	NC
TRINITY_DN1057_c0_g2	-1.343987813	0.002081452	DOWN	-0.652915935	0.210929981	NC	0.681893778	0.378020583	NC	CXE6_ARATH	Probable carboxylesterase 6
TRINITY_DN2195_c10_g1	0.14563517	0.858911475	NC	1.224384185	0.006778017	UP	1.070225405	0.042755545	UP
TRINITY_DN6045_c0_g1	1.033003081	0.028349441	UP	1.158017685	0.011474341	UP	0.115638168	1	NC	VIT1_ARATH	Vacuolar iron transporter 1
TRINITY_DN7229_c0_g1	-1.082694816	0.023601494	NC	0.986149559	0.038369488	NC	2.059846872	3.58E-06	UP	C76BA_SWEMU	Geraniol 8-hydroxylase
TRINITY_DN13536_c1_g1	1.768847056	9.53E-05	UP	0.821155598	0.131681867	NC	-0.957325815	0.095669918	NC	BH095_ARATH	Transcription factor bHLH95
TRINITY_DN1808_c0_g1	1.83300308	6.47E-05	UP	1.725661095	0.000187351	UP	-0.116835312	1	NC	NAT11_ARATH	Nucleobase-ascorbate transporter 11
TRINITY_DN13_c0_g1	1.686065814	0.000138377	UP	2.174044389	5.07E-07	UP	0.479063129	0.794282967	NC	NPR5_ARATH	Regulatory protein NPR5
TRINITY_DN16079_c0_g1	1.34749301	0.002696178	UP	1.426106015	0.001327933	UP	0.068998796	1	NC
TRINITY_DN2574_c0_g1	-2.331815744	4.43E-08	DOWN	-0.683961779	0.187367109	NC	1.638707793	0.000318316	UP	P2C56_ARATH	Protein phosphatase 2C 56
TRINITY_DN3832_c0_g1	1.476615275	0.000930765	UP	1.515449934	0.000626263	UP	0.029176595	1	NC	Y1648_ARATH	Uncharacterized protein At1g66480
TRINITY_DN6497_c0_g5	-1.010890624	0.033663178	DOWN	-0.931009313	0.053264973	NC	0.07101314	1	NC
TRINITY_DN17569_c0_g1	-2.56108231	3.84E-09	DOWN	-3.391509153	2.88E-14	DOWN	-0.840099275	0.235723972	NC	SUBL_ARATH	Subtilisin-like protease
TRINITY_DN1737_c0_g2	2.510478546	3.14E-09	UP	1.943353812	4.58E-06	UP	-0.576462259	0.578380341	NC
TRINITY_DN36364_c0_g1	10.2821902	3.09E-26	UP	9.335816372	2.18E-19	NC	-0.989475138	0.08353633	NC	H42_EMENI	Histone H4.2
TRINITY_DN44288_c0_g1	10.1332103	4.37E-25	UP	0	1	NC	-10.5517955	1.15E-32	DOWN	RL14_GRIJA	60S ribosomal protein L14
TRINITY_DN4767_c0_g1	-1.02050195	0.029820125	DOWN	-0.599714981	0.277704542	NC	0.411546238	0.943209543	NC
TRINITY_DN16625_c0_g1	10.23152771	7.73E-26	UP	13.17563239	4.55E-49	UP	2.900450778	2.09E-11	UP	YFZ4_SCHPO	Uncharacterized transporter C1039.04
TRINITY_DN11830_c0_g1	-4.422096636	2.87E-21	DOWN	-2.920988453	1.76E-11	DOWN	1.493816425	0.004285077	NC
TRINITY_DN643_c1_g1	3.370669432	2.70E-14	UP	3.485674026	3.14E-15	UP	0.105396556	1	NC	ARGI1_ORYSJ	Arginase 1, mitochondrial
TRINITY_DN1498_c1_g1	-1.347880023	0.003107559	DOWN	-0.860566066	0.084769382	NC	0.478041505	0.825708604	NC
TRINITY_DN2390_c1_g2	0.988103907	0.034272946	NC	1.175775481	0.008680804	UP	0.178137658	1	NC
TRINITY_DN6061_c0_g1	3.147729556	1.92E-12	UP	3.465286627	9.91E-15	UP	0.307939828	1	NC	CDC2D_ANTMA	Cell division control protein 2 homolog D
TRINITY_DN8470_c0_g2	7.638968659	7.97E-31	UP	8.900023388	8.08E-42	UP	1.249031073	0.010416872	UP	RS13_SOYBN	40S ribosomal protein S13
TRINITY_DN1612_c1_g2	1.172220443	0.008672068	UP	1.006435968	0.028393889	UP	-0.175300408	1	NC	RTOR1_ARATH	Regulatory-associated protein of TOR 1
TRINITY_DN1718_c0_g2	-1.553022826	0.000326598	DOWN	-1.806932667	2.25E-05	DOWN	-0.263592071	1	NC
TRINITY_DN14323_c0_g1	-0.697340997	0.194199799	NC	-1.079236559	0.02140412	DOWN	-0.392281346	0.983364679	NC
TRINITY_DN7099_c1_g1	2.11903721	1.03E-06	UP	2.392190993	2.87E-08	UP	0.263731282	1	NC	Y5566_ARATH	Uncharacterized protein At5g65660
TRINITY_DN922_c1_g1	-0.821202371	0.093166292	NC	-1.237867319	0.005217041	DOWN	-0.42640117	0.902069123	NC	PER64_ARATH	Peroxidase 64
TRINITY_DN2628_c0_g1	1.745754645	0.000327935	NC	3.27131217	1.29E-12	UP	1.516289955	0.00116203	UP
TRINITY_DN1166_c0_g2	-1.458979254	0.000713359	DOWN	-1.527535599	0.000355648	DOWN	-0.078061606	1	NC
TRINITY_DN6895_c0_g1	-1.057800424	0.026036536	DOWN	-0.84442539	0.090823599	NC	0.204055021	1	NC	Y1668_ARATH	Probable inactive leucine-rich repeat receptor-like protein kinase At1g66830
TRINITY_DN2352_c1_g3	-0.089898694	0.920439644	NC	1.916264027	6.46E-06	UP	1.996642358	4.90E-06	UP
TRINITY_DN6313_c0_g1	0.763669385	0.135674644	NC	1.132105816	0.013458371	UP	0.358957602	1	NC	Y2424_ARATH	BTB/POZ domain-containing protein At2g24240
TRINITY_DN9051_c0_g1	1.941663474	2.54E-05	UP	1.482107352	0.002091588	NC	-0.469279514	0.833708648	NC	MOC2B_ARATH	Molybdopterin synthase catalytic subunit {ECO:0000255|HAMAP-Rule:MF_03052}
TRINITY_DN9343_c1_g1	-1.48570024	0.000833408	DOWN	-1.288690339	0.004500879	DOWN	0.187427562	1	NC	Y3804_ARATH	Probably inactive leucine-rich repeat receptor-like protein kinase At3g28040
TRINITY_DN3339_c0_g1	2.349638667	1.36E-07	UP	2.500866376	1.89E-08	UP	0.141321943	1	NC	Y5157_ARATH	Probable leucine-rich repeat receptor-like serine/threonine-protein kinase At5g15730
TRINITY_DN2389_c0_g1	1.954636607	6.03E-06	UP	1.817943108	2.69E-05	UP	-0.146047483	1	NC
TRINITY_DN7502_c0_g1	-0.203730648	0.795122275	NC	-1.404934316	0.002155954	NC	-1.210516937	0.019940117	DOWN
TRINITY_DN11861_c0_g2	2.438823746	4.80E-08	NC	2.757907894	5.37E-10	UP	0.309401893	1	NC	RGA4_SOLBU	Putative disease resistance protein RGA4
TRINITY_DN2592_c1_g2	1.364730885	0.001998814	UP	1.979862886	3.20E-06	UP	0.605706549	0.520310701	NC	HSP72_SOLLC	Heat shock cognate 70 kDa protein 2
TRINITY_DN10812_c0_g2	-0.857125224	0.077697488	NC	-1.011128767	0.02894522	DOWN	-0.163421046	1	NC	ATL51_ARATH	RING-H2 finger protein ATL51
TRINITY_DN17685_c0_g2	7.504921042	5.28E-09	NC	10.20829023	7.56E-26	UP	2.661269699	7.75E-09	UP	RL43_ASHGO	60S ribosomal protein L43
TRINITY_DN735_c2_g1	-1.03440662	0.024009188	DOWN	-0.729432974	0.147670566	NC	0.295655207	1	NC
TRINITY_DN533_c1_g1	1.230073281	0.012705581	NC	1.225948256	0.012648284	UP	-0.013190619	1	NC	PLP9_ARATH	Probable inactive patatin-like protein 9
TRINITY_DN3681_c0_g1	1.843976674	0.00014818	NC	3.381950005	3.19E-13	UP	1.528846431	0.001048252	UP
TRINITY_DN720_c0_g1	2.875107996	6.84E-11	UP	1.554996676	0.000669857	UP	-1.330170248	0.005561989	DOWN	BGL40_ARATH	Beta-glucosidase 40
TRINITY_DN19085_c1_g1	-6.609952246	1.28E-34	DOWN	-5.529082891	3.64E-29	DOWN	0	1	NC
TRINITY_DN28267_c0_g1	-1.013846835	0.032106164	DOWN	-1.085582461	0.019888818	DOWN	-0.081152314	1	NC	HSP7P_ARATH	Heat shock 70 kDa protein 15
TRINITY_DN3515_c1_g2	0.955040447	0.053615136	NC	1.594117642	0.000340325	UP	0.629765091	0.490838377	NC
TRINITY_DN2487_c0_g3	1.504025909	0.000985855	UP	1.448035349	0.001622785	UP	-0.065655919	1	NC
TRINITY_DN17077_c0_g1	9.298203158	5.60E-19	NC	10.29015225	1.17E-25	UP	0.948512519	0.10696164	NC	IF4A_CHAGB	ATP-dependent RNA helicase eIF4A
TRINITY_DN3038_c0_g2	-1.039275675	0.023554928	DOWN	-1.817181319	1.82E-05	DOWN	-0.787376014	0.230382156	NC	BGH3B_BACO1	Beta-glucosidase BoGH3B
TRINITY_DN3748_c0_g1	2.167750537	8.87E-07	UP	2.434295018	2.82E-08	UP	0.257110495	1	NC
TRINITY_DN151_c5_g1	1.608159067	0.000587877	NC	1.785700799	0.000100896	UP	0.16783371	1	NC	CCX1_ARATH	Cation/calcium exchanger 1
TRINITY_DN1384_c1_g1	0.979598769	0.036998091	NC	1.009222663	0.029665087	UP	0.020435252	1	NC
TRINITY_DN2972_c0_g1	-0.226532983	0.767311726	NC	-1.141287978	0.013360864	DOWN	-0.924702188	0.114488032	NC
TRINITY_DN16098_c0_g1	9.872253683	3.85E-23	NC	10.48627877	3.83E-27	UP	0.570281707	0.628521974	NC	ARF_VIGUN	ADP-ribosylation factor
TRINITY_DN2780_c0_g1	1.342557333	0.002149241	UP	1.489805014	0.000538598	UP	0.137711004	1	NC
TRINITY_DN1437_c0_g1	1.014372486	0.02749041	UP	0.759504998	0.126850433	NC	-0.264133442	1	NC	PRXQ_POPJC	Peroxiredoxin Q, chloroplastic
TRINITY_DN1826_c0_g1	-1.027845238	0.026379396	DOWN	-1.093214764	0.01652322	DOWN	-0.074950586	1	NC	LBD39_ARATH	LOB domain-containing protein 39
TRINITY_DN9384_c0_g2	5.403012393	1.60E-28	UP	4.768829465	1.17E-23	UP	-0.643714175	0.44571998	NC
TRINITY_DN16867_c0_g1	10.29258516	2.57E-26	UP	10.5546649	1.10E-27	UP	0.218209176	1	NC	UBIQ_RABIT	Ubiquitin
TRINITY_DN19988_c0_g2	1.155002247	0.013597638	UP	0.16073751	0.849560046	NC	-1.004224099	0.07407575	NC	Y4265_ARATH	Probable LRR receptor-like serine/threonine-protein kinase At4g26540
TRINITY_DN7473_c0_g1	1.738770526	4.50E-05	UP	2.008433292	1.91E-06	UP	0.260170839	1	NC	PDCB4_ARATH	PLASMODESMATA CALLOSE-BINDING PROTEIN 4
TRINITY_DN6836_c0_g1	0	1	NC	10.5457905	4.09E-47	UP	13.4091345	4.16E-56	UP	MPR_BACSU	Extracellular metalloprotease
TRINITY_DN5805_c0_g1	-4.192586203	3.15E-18	DOWN	-1.710358476	0.000114475	DOWN	2.476204461	4.16E-07	NC	PLA14_ARATH	Phospholipase A1-Ibeta2, chloroplastic
TRINITY_DN7755_c0_g1	7.061818805	4.95E-24	UP	9.934428733	4.03E-47	UP	2.859413832	3.78E-11	UP	HSP75_CANAW	Heat shock protein SSB1
TRINITY_DN576_c0_g1	13.24220539	1.85E-49	UP	15.01153228	1.69E-64	UP	1.72579147	9.84E-05	UP	PMA1_NEUCR	Plasma membrane ATPase
TRINITY_DN6231_c0_g1	9.914682571	1.76E-23	NC	12.51801754	1.05E-43	UP	2.559802651	3.82E-09	UP	MPCP_YEAST	Mitochondrial phosphate carrier protein
TRINITY_DN2449_c1_g2	-3.106400299	2.54E-13	DOWN	-2.968663387	2.01E-12	DOWN	0.128461431	1	NC	MEX1_ORYSJ	Maltose excess protein 1-like, chloroplastic
TRINITY_DN4749_c0_g1	1.333000156	0.002783391	UP	1.295680307	0.003764017	UP	-0.047006122	1	NC	CCA31_ARATH	Putative cyclin-A3-1
TRINITY_DN7450_c0_g3	1.012736503	0.032530578	UP	-10.19766361	8.87E-29	NC	-11.5950515	4.72E-41	DOWN
TRINITY_DN12040_c0_g2	0	1	NC	10.73823492	3.97E-29	UP	4.152334564	7.83E-18	UP	IF5_YEAST	Eukaryotic translation initiation factor 5
TRINITY_DN7630_c0_g1	-1.53756816	0.000381915	DOWN	-1.096604504	0.015552486	DOWN	0.431817928	0.894204	NC
TRINITY_DN9378_c0_g1	-0.539257759	0.358587595	NC	0.947425442	0.047964465	NC	1.477471398	0.001591857	UP
TRINITY_DN8570_c0_g1	0.199481544	0.795080809	NC	-0.843153203	0.080528671	NC	-1.052413497	0.044664648	DOWN
TRINITY_DN36698_c0_g1	3.013921687	2.01E-11	UP	2.126107959	2.65E-06	UP	-0.897083863	0.131453034	NC	R13L1_ARATH	Putative disease resistance RPP13-like protein 1
TRINITY_DN4388_c0_g6	0.772435949	0.14581586	NC	1.418311035	0.001727101	UP	0.636112614	0.48286369	NC
TRINITY_DN1019_c0_g3	2.203352577	2.34E-07	UP	2.842681503	2.66E-11	UP	0.629906174	0.473315113	NC	LTL1_ARATH	GDSL esterase/lipase LTL1
TRINITY_DN1300_c1_g1	-1.128788964	0.014352758	DOWN	-0.291814458	0.680443739	NC	0.826893998	0.195962217	NC
TRINITY_DN9089_c0_g2	8.06294008	5.52E-12	NC	10.22034257	5.88E-26	UP	2.11536959	4.21E-06	UP	CPNE7_MOUSE	Copine-7 {ECO:0000250|UniProtKB:Q9UBL6}
TRINITY_DN7305_c0_g1	-0.02517665	0.979706003	NC	-1.2012127	0.007169209	DOWN	-1.185453396	0.017305025	DOWN	TF2B_SOYBN	Transcription initiation factor IIB
TRINITY_DN2756_c0_g3	-1.138916776	0.012584879	DOWN	-1.339433217	0.002435223	DOWN	-0.210743334	1	NC
TRINITY_DN15666_c0_g1	0.952686149	0.04878911	NC	-0.203343103	0.797871846	NC	-1.165878895	0.021628295	DOWN
TRINITY_DN7152_c0_g1	-1.170917508	0.010726091	DOWN	-0.277625239	0.697260517	NC	0.883898501	0.145287214	NC	PUB7_ARATH	U-box domain-containing protein 7
TRINITY_DN7073_c0_g1	0.230158982	0.77056164	NC	1.63766857	0.000188535	UP	1.398362628	0.003204319	UP	HTH_ARATH	Protein HOTHEAD
TRINITY_DN10232_c0_g1	1.769338678	3.58E-05	UP	1.290645148	0.003556606	UP	-0.489027685	0.771461329	NC
TRINITY_DN10790_c0_g1	1.140489466	0.012494159	UP	0.302761689	0.664319792	NC	-0.848265009	0.16840933	NC	RGA3_SOLBU	Putative disease resistance protein RGA3
TRINITY_DN16051_c0_g1	-0.514695994	0.384845935	NC	0.812044536	0.123977663	NC	1.31830183	0.007176233	UP	BRI1_SOLPE	Systemin receptor SR160
TRINITY_DN49314_c0_g1	9.155693832	5.41E-18	NC	11.29804207	1.12E-33	UP	2.099059107	2.49E-06	UP	SPEE_NEUCR	Spermidine synthase
TRINITY_DN14919_c0_g2	6.992422145	1.16E-07	NC	10.11841975	3.54E-25	UP	3.08387751	6.49E-11	UP
TRINITY_DN487_c0_g2	-1.128767218	0.01224632	DOWN	-1.248302652	0.004673918	DOWN	-0.129134138	1	NC	THD1_ARATH	Threonine dehydratase biosynthetic, chloroplastic
TRINITY_DN30_c0_g4	-0.498098637	0.385623502	NC	-1.143608331	0.010431709	DOWN	-0.655125479	0.42472536	NC	PFKA3_ARATH	ATP-dependent 6-phosphofructokinase 3 {ECO:0000255|HAMAP-Rule:MF_03186}
TRINITY_DN14437_c1_g1	0.284659486	0.68513632	NC	1.10905951	0.014438311	UP	0.81486529	0.196311256	NC
TRINITY_DN3546_c0_g1	1.676529604	0.00013259	UP	1.610469936	0.000246823	UP	-0.075335055	1	NC	TSO1_ARATH	CRC domain-containing protein TSO1
TRINITY_DN6111_c0_g1	2.116364665	8.00E-06	NC	2.966369279	1.20E-10	UP	0.840120282	0.188180797	NC	HIP26_ARATH	Heavy metal-associated isoprenylated plant protein 26
TRINITY_DN15235_c1_g1	10.66728049	3.31E-29	UP	0	1	NC	-9.4863385	1.42E-35	DOWN
TRINITY_DN10155_c0_g2	0	1	NC	11.49394904	2.72E-35	UP	3.787708869	1.12E-16	UP	UBC1_MAGO7	Ubiquitin-conjugating enzyme E2-16 kDa
TRINITY_DN644_c1_g2	1.321063669	0.002494156	UP	1.352769118	0.001842169	UP	0.022314621	1	NC	LBD38_ARATH	LOB domain-containing protein 38
TRINITY_DN7980_c0_g3	1.107529528	0.014186508	UP	0.868169306	0.068668408	NC	-0.24875554	1	NC	C76B6_CATRO	Geraniol 8-hydroxylase
TRINITY_DN2676_c1_g2	1.066631391	0.027352554	UP	0.02128189	0.997102093	NC	-1.056149122	0.049521591	DOWN
TRINITY_DN4075_c1_g2	-1.378773019	0.00197514	DOWN	-0.112114749	0.895107119	NC	1.257460331	0.010870954	UP
TRINITY_DN3212_c0_g1	11.71178025	1.16E-36	UP	13.89716073	3.58E-55	UP	2.141525872	7.60E-07	UP	GUNW_PECSS	Endoglucanase 6
TRINITY_DN4875_c1_g1	1.401355251	0.001953656	UP	-0.898330866	0.101447364	NC	-2.311063705	2.68E-07	DOWN
TRINITY_DN67061_c0_g1	1.553577911	0.000292999	UP	0.883607264	0.062743197	NC	-0.679516221	0.379976879	NC	RUBR_PYRFU	Rubredoxin
TRINITY_DN4978_c0_g2	-1.208928594	0.007108304	DOWN	-1.030912721	0.025524539	DOWN	0.168640037	1	NC	AMO2_ARTS1	Copper methylamine oxidase
TRINITY_DN16261_c0_g1	4.484441445	1.48E-21	UP	4.551561041	3.35E-22	UP	0.057409927	1	NC
TRINITY_DN48519_c0_g1	-1.48141033	0.000963951	DOWN	-0.901018461	0.06531059	NC	0.571810811	0.634287457	NC
TRINITY_DN64274_c0_g1	-0.359503843	0.606844895	NC	1.579081717	0.000356047	UP	1.929662606	1.56E-05	UP
TRINITY_DN3139_c1_g2	1.227566167	0.005613207	UP	1.047927427	0.021385142	UP	-0.189319435	1	NC	GLYR1_ARATH	Glyoxylate/succinic semialdehyde reductase 1
TRINITY_DN3341_c0_g1	3.039735831	6.93E-11	UP	2.766093073	2.58E-09	NC	-0.284361822	1	NC
TRINITY_DN1877_c0_g2	2.698716942	3.33E-10	UP	1.916315378	9.08E-06	UP	-0.791599064	0.22245137	NC	ERF03_ARATH	Ethylene-responsive transcription factor ERF003
TRINITY_DN6569_c0_g1	-1.86856432	2.82E-05	DOWN	-1.860053001	3.06E-05	DOWN	-0.001254047	1	NC
TRINITY_DN14478_c0_g1	-1.060239262	0.023695767	DOWN	-0.836533363	0.091163536	NC	0.213559797	1	NC
TRINITY_DN4856_c0_g1	1.25441782	0.006199213	UP	1.1157643	0.017114463	UP	-0.148163833	1	NC
TRINITY_DN2292_c0_g3	8.256271874	4.31E-13	NC	11.66154016	1.17E-36	UP	3.362414551	5.39E-14	UP
TRINITY_DN530_c0_g1	-0.536745607	0.33650286	NC	-1.458913543	0.000697241	DOWN	-0.931779321	0.097838468	NC	TLOV1_ARATH	Protein TWIN LOV 1
TRINITY_DN3590_c0_g3	0.901773773	0.066992695	NC	-0.357183556	0.597678042	NC	-1.268834215	0.009826833	DOWN	FRS5_ARATH	Protein FAR1-RELATED SEQUENCE 5
TRINITY_DN3705_c0_g1	1.243836211	0.006095651	UP	1.337560975	0.002748342	UP	0.084586945	1	NC	UGT6_CATRO	7-deoxyloganetin glucosyltransferase
TRINITY_DN49_c0_g1	0.89139491	0.068980073	NC	1.190053611	0.009009716	UP	0.28909171	1	NC
TRINITY_DN18799_c0_g1	1.199192642	0.007036434	UP	0.675999191	0.191264533	NC	-0.532799169	0.669741647	NC	MSRB5_ORYSJ	Peptide methionine sulfoxide reductase B5
TRINITY_DN1101_c0_g4	1.592739333	0.000350924	UP	1.071436428	0.024624206	UP	-0.530802522	0.690821359	NC	UBQ10_ARATH	Polyubiquitin 10
TRINITY_DN8911_c0_g1	-1.384382111	0.002289497	DOWN	-0.981221163	0.041339289	NC	0.393134386	0.990815147	NC	WRK75_ARATH	Probable WRKY transcription factor 75
TRINITY_DN3080_c4_g1	3.051923347	6.86E-11	UP	4.673030196	9.99E-23	UP	1.611435605	0.000401808	UP	BCS1B_DICDI	Probable mitochondrial chaperone BCS1-B
TRINITY_DN10215_c0_g1	8.385361639	6.89E-14	NC	10.65872393	1.68E-28	UP	2.229990924	8.47E-07	UP	COX9_ASHGO	Cytochrome c oxidase subunit 7A
TRINITY_DN8504_c0_g1	1.393403205	0.001921171	UP	2.25220972	1.55E-07	UP	0.849356298	0.164011215	NC	RBM38_XENTR	RNA-binding protein 38
TRINITY_DN958_c0_g5	2.156566485	1.54E-05	NC	3.635291354	4.17E-14	UP	1.468929186	0.002242963	UP	DOF34_ARATH	Dof zinc finger protein DOF3.4
TRINITY_DN2457_c4_g1	1.454477469	0.000799071	UP	0.934393748	0.04701029	NC	-0.529599756	0.676634618	NC	HDHD3_XENLA	Haloacid dehalogenase-like hydrolase domain-containing protein 3
TRINITY_DN2537_c0_g3	1.861379608	1.62E-05	UP	0.426819714	0.49675253	NC	-1.444381338	0.002046022	DOWN
TRINITY_DN10090_c0_g1	-2.152679811	2.76E-07	DOWN	-2.341239706	2.13E-08	DOWN	-0.197754213	1	NC
TRINITY_DN15_c0_g1	0.822592848	0.095122529	NC	-0.317461921	0.644423238	NC	-1.149440048	0.022765783	DOWN
TRINITY_DN10980_c0_g1	0.111797348	0.89979311	NC	1.098001446	0.017502294	UP	0.977053947	0.078019097	NC
TRINITY_DN8009_c0_g1	10.37213423	6.22E-27	UP	10.42585912	1.09E-26	UP	0.009804103	1	NC	DERL1_ARATH	Derlin-1
TRINITY_DN5134_c0_g1	-1.470317557	0.000642103	DOWN	-1.087913683	0.015722977	DOWN	0.373151072	0.994298828	NC	TI141_ARATH	Mitochondrial import inner membrane translocase subunit TIM14-1
TRINITY_DN11213_c0_g1	5.78643874	1.62E-21	UP	5.019298415	3.02E-16	NC	-0.778933733	0.266348276	NC	RBK2_ARATH	Receptor-like cytosolic serine/threonine-protein kinase RBK2
TRINITY_DN4670_c0_g2	1.631506622	0.000328559	UP	1.293770404	0.006019151	UP	-0.347778497	1	NC
TRINITY_DN7573_c0_g1	1.499348782	0.001272321	NC	1.824369972	5.50E-05	UP	0.316007719	1	NC
TRINITY_DN40123_c0_g1	0	1	NC	10.30321909	9.32E-26	UP	4.617735647	7.51E-20	UP
TRINITY_DN861_c2_g1	1.255037442	0.005775905	UP	1.168984944	0.010808486	UP	-0.095745991	1	NC
TRINITY_DN958_c0_g7	3.814736848	8.55E-18	UP	4.110505205	3.20E-20	UP	0.286350084	1	NC	DOF34_ARATH	Dof zinc finger protein DOF3.4
TRINITY_DN1004_c0_g2	6.772565605	8.53E-32	UP	6.448090286	3.02E-29	UP	-0.335864104	1	NC
TRINITY_DN2592_c4_g1	9.232604219	1.71E-18	NC	10.51181614	2.40E-27	UP	1.235497783	0.015045239	UP	HSP70_NEUCR	Heat shock 70 kDa protein
TRINITY_DN23738_c0_g1	-1.038682436	0.022816905	DOWN	-1.386170297	0.00135535	DOWN	-0.35687656	1	NC
TRINITY_DN18109_c0_g1	9.157876226	5.41E-18	NC	10.4169652	1.28E-26	UP	1.214921761	0.018427214	UP	IF4A_PHANO	ATP-dependent RNA helicase eIF4A
TRINITY_DN2686_c0_g1	-1.071281507	0.022191931	DOWN	-0.182690061	0.821076639	NC	0.878917115	0.146351254	NC
TRINITY_DN3353_c0_g4	-0.615069008	0.319634657	NC	1.362235907	0.002893229	UP	1.968637091	1.54E-05	UP
TRINITY_DN2703_c1_g1	2.286363326	4.27E-07	UP	2.729368825	1.06E-09	UP	0.433494366	0.892575677	NC	LRP1_ARATH	Protein LATERAL ROOT PRIMORDIUM 1
TRINITY_DN2153_c0_g1	0.028769598	0.977634844	NC	-1.124169399	0.014844927	DOWN	-1.162495148	0.022451019	DOWN
TRINITY_DN38190_c0_g1	0	1	NC	11.00958263	2.55E-31	UP	5.317402964	4.01E-25	UP	LYP1_YEAST	Lysine-specific permease
TRINITY_DN1662_c0_g1	10.16106656	4.26E-63	UP	11.33244321	4.09E-73	UP	1.161132103	0.019474544	UP
TRINITY_DN16579_c0_g1	2.783925543	1.22E-09	UP	1.816190904	0.000113388	NC	-0.979652127	0.084188668	NC	HISX_BRAOC	Histidinol dehydrogenase, chloroplastic
TRINITY_DN131400_c0_g1	0.479539715	0.414719605	NC	1.037835912	0.023351837	UP	0.548400022	0.638841468	NC
TRINITY_DN2852_c0_g1	-1.367048469	0.00173676	DOWN	-1.47519301	0.000623409	DOWN	-0.117561438	1	NC	EDR1_ARATH	Serine/threonine-protein kinase EDR1
TRINITY_DN1239_c0_g2	-1.008155618	0.04492768	NC	0.65993448	0.232837092	NC	1.658970767	0.000370966	UP	LAC8_ARATH	Laccase-8
TRINITY_DN3368_c0_g1	0.894548653	0.062983961	NC	1.289320656	0.003527462	UP	0.385160525	0.978381906	NC
TRINITY_DN1267_c0_g1	1.359049542	0.002354287	UP	1.59729511	0.000249807	UP	0.228367423	1	NC	NHX3_ARATH	Sodium/hydrogen exchanger 3
TRINITY_DN1158_c0_g2	0.510813482	0.384388066	NC	1.069147723	0.020718853	UP	0.549628493	0.642327319	NC	SSU72_DANRE	RNA polymerase II subunit A C-terminal domain phosphatase SSU72
TRINITY_DN5506_c0_g1	1.433177865	0.001711002	UP	0.754138097	0.159848145	NC	-0.689106529	0.384856147	NC
TRINITY_DN9154_c0_g1	-1.269949166	0.003875505	DOWN	-1.007196093	0.027942851	DOWN	0.253346404	1	NC	U88A1_ARATH	UDP-glycosyltransferase 88A1
TRINITY_DN7572_c0_g5	10.5363521	3.52E-28	UP	0	1	NC	-10.9550633	7.02E-36	DOWN	RLA1_CHLRE	60S acidic ribosomal protein P1
TRINITY_DN14339_c0_g1	3.63718137	6.70E-13	UP	3.752195724	9.22E-14	UP	0.104599286	1	NC	BCP_PEA	Blue copper protein
TRINITY_DN6258_c0_g1	14.23184061	8.01E-58	UP	14.85662687	2.60E-63	UP	0.580727401	0.566876036	NC	EF1A_DANRE	Elongation factor 1-alpha
TRINITY_DN18261_c0_g1	1.561738084	0.000421858	UP	2.264576225	1.45E-07	UP	0.693167828	0.369030595	NC	C76BA_SWEMU	Geraniol 8-hydroxylase
TRINITY_DN7945_c0_g1	11.21646628	1.18E-32	UP	13.1469342	7.65E-49	UP	1.886650403	1.79E-05	UP	RS21_DICDI	40S ribosomal protein S21
TRINITY_DN24489_c0_g1	-1.063078443	0.032750206	NC	0.761723811	0.159271536	NC	1.816212345	8.98E-05	UP	1433A_SOYBN	14-3-3-like protein A
TRINITY_DN2514_c1_g2	-1.357625605	0.002118031	DOWN	-0.42374493	0.489712717	NC	0.92477245	0.108213448	NC	MYB44_ARATH	Transcription factor MYB44
TRINITY_DN4401_c0_g2	-2.863067515	2.48E-11	DOWN	-0.982304289	0.03452344	NC	1.871456088	2.76E-05	UP	TI10B_ARATH	Protein TIFY 10B
TRINITY_DN16949_c1_g1	-2.503195125	2.40E-08	DOWN	-0.277732722	0.708607828	NC	2.218114001	1.35E-06	UP
TRINITY_DN6363_c1_g1	0.46310187	0.43421192	NC	1.706131453	5.92E-05	UP	1.233946127	0.011184452	UP
TRINITY_DN894_c3_g1	2.107564732	7.55E-07	UP	2.564445803	1.53E-09	UP	0.447630511	0.849000806	NC
TRINITY_DN9878_c0_g1	9.22833207	1.71E-18	NC	11.7276405	3.31E-37	UP	2.456349109	2.27E-08	UP	RL4B_SCHPO	60S ribosomal protein L4-B
TRINITY_DN4713_c2_g2	1.055046601	0.031373253	UP	0.511057335	0.420721172	NC	-0.553395939	0.658966016	NC	SPEA_BACSU	Arginine decarboxylase
TRINITY_DN4446_c1_g1	-0.0138631	0.990698698	NC	1.251672151	0.005736563	UP	1.256182214	0.010740547	UP
TRINITY_DN4057_c1_g2	-0.807524808	0.108288364	NC	-1.084204175	0.019537175	DOWN	-0.286522606	1	NC	ERP1B_CAEEL	Putative endoplasmic reticulum metallopeptidase 1-B {ECO:0000250|UniProtKB:Q6UPR8}
TRINITY_DN423_c0_g2	1.681834953	0.000237366	UP	1.705094293	0.000180758	UP	0.013612636	1	NC	JAC1_ARATH	J domain-containing protein required for chloroplast accumulation response 1
TRINITY_DN9248_c0_g2	2.086890492	3.04E-06	UP	2.533091057	9.53E-09	UP	0.43639246	0.88794197	NC	AX10A_SOYBN	Auxin-induced protein X10A
TRINITY_DN4454_c0_g1	1.505335776	0.000608224	UP	1.964570505	4.37E-06	UP	0.449717091	0.848385214	NC	RABA3_ARATH	Ras-related protein RABA3
TRINITY_DN3684_c0_g1	10.92195247	2.62E-30	UP	12.03849234	9.02E-40	UP	1.072535564	0.040915829	UP	R10A1_ARATH	60S ribosomal protein L10a-1
TRINITY_DN8443_c0_g5	1.811906494	1.91E-05	UP	1.432812657	0.000927092	UP	-0.388431156	0.970499317	NC
TRINITY_DN3300_c0_g1	7.324015412	1.82E-35	UP	5.616885896	2.10E-22	UP	-1.718355699	0.000128212	DOWN	BH093_ARATH	Transcription factor bHLH93
TRINITY_DN4621_c0_g1	-1.05922727	0.02127568	DOWN	-0.830323356	0.08823133	NC	0.218890401	1	NC	CENPX_BOVIN	Centromere protein X
TRINITY_DN7936_c0_g1	2.117554199	1.22E-06	UP	1.896171893	1.51E-05	UP	-0.230756027	1	NC	RAP27_ARATH	Ethylene-responsive transcription factor RAP2-7
TRINITY_DN18113_c0_g1	-1.994740879	5.66E-06	DOWN	-2.202748108	4.41E-07	DOWN	-0.218262813	1	NC	M1250_ARATH	Uncharacterized mitochondrial protein AtMg01250
TRINITY_DN4011_c1_g1	1.045251726	0.021668054	UP	0.835365191	0.081815977	NC	-0.219552891	1	NC	ROGFC_ARATH	Rop guanine nucleotide exchange factor 12
TRINITY_DN599_c0_g1	2.746074965	2.94E-10	UP	2.524749311	6.10E-09	UP	-0.230766399	1	NC	U86A1_ARATH	UDP-glycosyltransferase 86A1
TRINITY_DN3645_c3_g1	-1.792372348	2.93E-05	DOWN	-1.13680418	0.011937633	DOWN	0.646148252	0.455896555	NC
TRINITY_DN12495_c0_g1	-1.129225806	0.014402607	DOWN	-2.877310138	6.02E-11	DOWN	-1.758009671	0.000167635	DOWN	METE_PLESU	5-methyltetrahydropteroyltriglutamate--homocysteine methyltransferase
TRINITY_DN11011_c0_g2	9.688188099	8.97E-22	NC	11.88731546	1.61E-38	UP	2.155636304	9.77E-07	UP	RL21B_SCHPO	60S ribosomal protein L21-B
TRINITY_DN5831_c0_g1	0.384287657	0.582493709	NC	1.13272408	0.017155464	UP	0.739773308	0.307216394	NC
TRINITY_DN1623_c0_g1	2.445975919	1.79E-08	UP	2.956312961	9.87E-12	UP	0.500725387	0.747018914	NC	TBB8_ARATH	Tubulin beta-8 chain
TRINITY_DN488_c2_g2	3.014717052	1.38E-12	UP	3.133722193	1.77E-13	UP	0.109632231	1	NC	LSH6_ARATH	Protein LIGHT-DEPENDENT SHORT HYPOCOTYLS 6
TRINITY_DN1864_c1_g1	1.77945154	2.56E-05	UP	1.96019467	3.02E-06	UP	0.171221445	1	NC	TRL12_ORYSJ	Thioredoxin-like 1-2, chloroplastic
TRINITY_DN7065_c0_g1	11.35056359	1.01E-33	UP	11.63308459	2.04E-36	UP	0.23867156	1	NC	SAHH_DICDI	Adenosylhomocysteinase
TRINITY_DN88129_c0_g1	-0.729437512	0.156317296	NC	0.514272463	0.372206609	NC	1.234291242	0.012041088	UP	CRK25_ARATH	Cysteine-rich receptor-like protein kinase 25
TRINITY_DN6905_c1_g1	1.869664257	9.16E-06	UP	1.613425838	0.000147435	UP	-0.265619955	1	NC	C8D11_ARATH	Cytochrome P450 81D11
TRINITY_DN12125_c0_g3	-0.99161168	0.036317133	NC	-1.966489972	6.05E-06	DOWN	-0.982934451	0.0859503	NC
TRINITY_DN6703_c0_g1	5.506815383	1.86E-31	UP	5.931878087	2.19E-35	UP	0.415852535	0.916729816	NC
TRINITY_DN3532_c0_g1	-2.965065604	5.72E-12	DOWN	-2.726283145	1.64E-10	DOWN	0.229227151	1	NC
TRINITY_DN4235_c0_g1	1.23345977	0.00567593	UP	0.638616029	0.231136816	NC	-0.604311005	0.52364408	NC	CDF3_ARATH	Cyclic dof factor 3
TRINITY_DN13220_c0_g1	0	1	NC	11.36295568	3.35E-34	UP	11.73735766	3.32E-42	UP	YG31B_YEAST	Transposon Ty3-G Gag-Pol polyprotein
TRINITY_DN146606_c0_g1	0	1	NC	10.57573621	7.75E-28	UP	3.265696379	1.48E-12	UP
TRINITY_DN2582_c4_g1	-1.160780376	0.013303637	DOWN	-1.119777904	0.016844353	DOWN	0.031601406	1	NC	PP212_ARATH	Pentatricopeptide repeat-containing protein At3g04750, mitochondrial
TRINITY_DN8235_c0_g3	8.433899497	4.06E-14	NC	12.41758019	7.02E-43	UP	3.940797271	2.23E-18	UP	RL191_ARATH	60S ribosomal protein L19-1
TRINITY_DN191_c0_g2	1.156915841	0.01013597	UP	0.795900428	0.105959158	NC	-0.370680792	0.998654599	NC	Y2104_ARATH	Uncharacterized methyltransferase At2g41040, chloroplastic
TRINITY_DN4562_c0_g1	1.5181467	0.00043131	UP	0.389504844	0.536879445	NC	-1.138330536	0.023572511	DOWN	Y4885_ARATH	Probable LRR receptor-like serine/threonine-protein kinase At4g08850
TRINITY_DN5486_c0_g1	11.26291176	5.15E-33	UP	12.52195254	1.02E-43	UP	1.215333738	0.013722671	UP	RL30_SPOFR	60S ribosomal protein L30
TRINITY_DN8717_c0_g1	10.84905524	9.33E-30	UP	11.96361104	3.76E-39	UP	1.07072866	0.041437187	UP	SAP6_ORYSJ	Zinc finger A20 and AN1 domain-containing stress-associated protein 6
TRINITY_DN3443_c1_g1	6.173987903	4.34E-23	UP	4.960340917	1.21E-14	NC	-1.225394434	0.016342805	DOWN
TRINITY_DN15909_c0_g1	-1.995458528	2.79E-06	DOWN	-2.612846234	8.34E-10	DOWN	-0.627068237	0.50460639	NC	BZIP9_ARATH	Basic leucine zipper 9
TRINITY_DN1598_c0_g1	1.099000552	0.017479664	UP	1.007432473	0.031897255	UP	-0.101399307	1	NC	FB348_ARATH	F-box protein At2g16365
TRINITY_DN15067_c0_g1	0	1	NC	11.10772934	4.01E-32	UP	3.692649701	1.15E-15	UP	ZN423_MOUSE	Zinc finger protein 423
TRINITY_DN943_c2_g1	-1.274680754	0.003660812	DOWN	-1.743517085	3.69E-05	DOWN	-0.478469054	0.787482926	NC	METL2_ARATH	Methyltransferase-like protein 2
TRINITY_DN2007_c1_g1	-2.330583471	1.47E-07	DOWN	-1.873979048	2.33E-05	DOWN	0.448078217	0.922018118	NC	CHIT2_TULBA	Chitinase 2
TRINITY_DN461_c0_g1	1.51682038	0.000401481	UP	1.434056433	0.000857542	UP	-0.092235784	1	NC	CP122_ARATH	Calvin cycle protein CP12-2, chloroplastic
TRINITY_DN10664_c0_g2	3.540695153	2.21E-12	UP	2.88749613	1.30E-08	NC	-0.662745661	0.450342415	NC
TRINITY_DN15709_c0_g1	-1.033415377	0.03071165	DOWN	-2.206315622	6.72E-07	DOWN	-1.184080316	0.028007232	NC
TRINITY_DN1233_c0_g1	1.205575415	0.006982683	UP	1.18809932	0.007831624	UP	-0.026945723	1	NC	RNG1L_ARATH	E3 ubiquitin-protein ligase RING1-like
TRINITY_DN463_c0_g1	2.636115159	3.93E-10	UP	2.159142574	2.70E-07	UP	-0.486568491	0.768911382	NC	GOX_SPIOL	Peroxisomal (S)-2-hydroxy-acid oxidase
TRINITY_DN1499_c1_g2	-2.410185216	1.45E-06	NC	1.597688621	0.000409622	UP	4.001862927	7.95E-17	UP	EF109_ARATH	Ethylene-responsive transcription factor ERF109
TRINITY_DN11531_c0_g1	11.7055208	1.30E-36	UP	13.09561933	1.95E-48	UP	1.345195741	0.004551828	UP	RS29_LYSTE	40S ribosomal protein S29
TRINITY_DN13085_c0_g1	2.450658968	2.52E-08	UP	0.70071877	0.178237614	NC	-1.761055274	0.000121468	DOWN
TRINITY_DN4010_c0_g1	10.44801831	1.67E-27	UP	12.73812528	1.80E-45	UP	2.246263725	2.41E-07	UP	RL36_TRIHM	60S ribosomal protein L36
TRINITY_DN12606_c0_g1	0.674128375	0.219192228	NC	-1.512006952	0.001137267	NC	-2.196319061	1.09E-06	DOWN
TRINITY_DN10842_c0_g2	0.885443185	0.07052872	NC	-0.255666116	0.733843795	NC	-1.150812761	0.02392511	DOWN
TRINITY_DN9094_c0_g1	2.383545471	1.07E-07	UP	1.32937051	0.005754531	NC	-1.06462498	0.045899647	DOWN
TRINITY_DN10366_c0_g2	-1.806701076	1.91E-05	DOWN	-3.073856479	3.86E-13	DOWN	-1.276373863	0.00808356	DOWN
TRINITY_DN9948_c0_g2	-1.297264626	0.00383283	DOWN	-1.248039613	0.005546899	DOWN	0.039566316	1	NC	POLX_TOBAC	Retrovirus-related Pol polyprotein from transposon TNT 1-94
TRINITY_DN2207_c0_g1	1.029699322	0.029840942	UP	0.337160299	0.628584212	NC	-0.702353301	0.359093197	NC	CPRF2_PETCR	Light-inducible protein CPRF2
TRINITY_DN4032_c0_g1	2.485756584	6.59E-09	UP	2.203227117	2.61E-07	UP	-0.292322272	1	NC	SRR1_ARATH	Protein SENSITIVITY TO RED LIGHT REDUCED 1
TRINITY_DN9902_c0_g1	-1.268205776	0.004335115	DOWN	-12.59494291	1.57E-48	DOWN	-11.7106873	5.48E-42	DOWN
TRINITY_DN1907_c1_g1	-2.531034764	7.37E-09	DOWN	-3.385923367	5.10E-14	DOWN	-0.865034165	0.22692653	NC	PUMP5_ARATH	Mitochondrial uncoupling protein 5
TRINITY_DN2875_c0_g3	-1.26565314	0.00421071	DOWN	-1.108826459	0.014011723	DOWN	0.147089687	1	NC
TRINITY_DN7190_c1_g1	-2.407720765	1.32E-08	DOWN	-2.353114039	2.52E-08	DOWN	0.045092357	1	NC	HSP7H_ARATH	Heat shock 70 kDa protein 8
TRINITY_DN2328_c1_g2	-5.162253313	1.08E-28	DOWN	-5.232792664	1.84E-29	DOWN	-0.079584551	1	NC	HSP11_HELAN	17.6 kDa class I heat shock protein
TRINITY_DN6702_c0_g1	2.280045213	1.72E-07	UP	-0.094751686	0.92660054	NC	-2.384633824	5.54E-08	DOWN	ALL13_OLEEU	Thaumatin-like protein
TRINITY_DN4741_c0_g1	2.32910092	3.82E-08	UP	2.093110245	7.76E-07	UP	-0.245637667	1	NC	H2A4_WHEAT	Histone H2A.4
TRINITY_DN1343_c3_g1	1.102576547	0.025359463	UP	0.335529439	0.66426109	NC	-0.776136884	0.270370874	NC
TRINITY_DN1026_c0_g1	-1.038175916	0.024062138	DOWN	-1.073219134	0.018330676	DOWN	-0.044560831	1	NC	ORP2A_ARATH	Oxysterol-binding protein-related protein 2A
TRINITY_DN14205_c0_g1	9.410121618	9.29E-20	NC	11.76433209	1.67E-37	UP	2.31102347	1.41E-07	UP	RS3_SCHPO	40S ribosomal protein S3
TRINITY_DN5967_c3_g1	0.543263717	0.348411205	NC	1.058318286	0.022973476	UP	0.505799109	0.743099094	NC
TRINITY_DN2661_c1_g1	2.031372217	1.65E-06	UP	2.028850323	1.61E-06	UP	-0.011831696	1	NC
TRINITY_DN8458_c2_g1	-2.287197197	1.64E-07	DOWN	-3.992317356	1.11E-17	DOWN	-1.716649286	0.000710616	NC
TRINITY_DN13256_c0_g1	2.035511478	2.07E-06	UP	2.543055803	2.37E-09	UP	0.498083599	0.749668528	NC	C78A5_ARATH	Cytochrome P450 78A5
TRINITY_DN5071_c0_g4	0	1	NC	11.39179751	1.94E-34	UP	7.50181441	5.26E-36	UP	RS25_NEUCR	40S ribosomal protein S25
TRINITY_DN3910_c2_g1	-2.245974209	9.46E-08	DOWN	1.035995045	0.022890142	UP	3.272655554	3.51E-14	UP	XTH8_ARATH	Probable xyloglucan endotransglucosylase/hydrolase protein 8
TRINITY_DN87115_c0_g1	-4.353525146	9.93E-23	DOWN	-2.807524295	2.52E-11	DOWN	1.536886352	0.000768304	UP
TRINITY_DN2841_c2_g1	9.336328257	2.93E-19	NC	10.88556223	2.60E-30	UP	1.506645858	0.001360683	UP
TRINITY_DN4075_c1_g1	-1.363602544	0.001791272	DOWN	-1.078674191	0.017211938	DOWN	0.275483973	1	NC
TRINITY_DN810_c0_g2	1.019706993	0.026763387	UP	1.257339994	0.004337915	UP	0.22807157	1	NC	GATA5_ARATH	GATA transcription factor 5
TRINITY_DN2585_c0_g1	-2.012655018	2.47E-06	DOWN	-1.82266997	2.08E-05	DOWN	0.180658642	1	NC
TRINITY_DN3066_c0_g1	2.431271164	8.24E-09	UP	2.588531561	8.02E-10	UP	0.147632403	1	NC	U74F2_ARATH	UDP-glycosyltransferase 74F2
TRINITY_DN11631_c0_g3	-1.970352467	9.67E-06	DOWN	-3.598244387	6.51E-15	DOWN	-1.640909636	0.001432077	NC	RLP12_ARATH	Receptor-like protein 12
TRINITY_DN4363_c0_g1	9.751420259	2.94E-22	NC	10.88131628	2.83E-30	UP	1.086255852	0.041363068	UP	EF2_NEUCR	Elongation factor 2
TRINITY_DN7886_c0_g1	1.178255923	0.012299663	UP	1.029404805	0.033975284	NC	-0.159084916	1	NC
TRINITY_DN5071_c0_g3	8.235499199	6.28E-13	NC	11.79553916	9.11E-38	UP	3.517623837	4.39E-15	UP	RS25_NEUCR	40S ribosomal protein S25
TRINITY_DN6649_c0_g4	-0.547617879	0.334088639	NC	-1.465799506	0.000837317	DOWN	-0.927808605	0.110113123	NC
TRINITY_DN53441_c0_g1	1.294978048	0.003053584	UP	1.813136794	1.67E-05	UP	0.50968101	0.716641517	NC
TRINITY_DN12302_c0_g1	-2.479243354	3.94E-08	DOWN	-0.730571158	0.171624315	NC	1.739986542	0.000276706	NC
TRINITY_DN15950_c0_g1	6.729600328	2.94E-15	NC	8.668011062	6.89E-29	UP	1.920962664	2.49E-05	UP
TRINITY_DN5884_c0_g1	-0.641070301	0.221573387	NC	-1.091486369	0.015202821	DOWN	-0.459695042	0.826133987	NC	FBK50_ARATH	F-box/kelch-repeat protein At3g06240
TRINITY_DN8082_c0_g1	0.14441963	0.870303063	NC	-0.922472351	0.059918868	NC	-1.076492505	0.045086296	DOWN
TRINITY_DN8120_c0_g1	1.424177614	0.001013615	UP	1.351100397	0.001911619	UP	-0.082598369	1	NC	SKIP6_ARATH	F-box/kelch-repeat protein SKIP6
TRINITY_DN2637_c0_g1	0.972380754	0.041310123	NC	1.236571288	0.006024019	UP	0.254699254	1	NC	P24B2_ARATH	Transmembrane emp24 domain-containing protein p24beta2
TRINITY_DN10784_c0_g1	8.58329897	6.78E-44	UP	0	1	NC	-13.40993144	4.16E-56	DOWN
TRINITY_DN146180_c0_g1	-1.998649813	2.59E-06	DOWN	-2.163044928	3.30E-07	DOWN	-0.173640077	1	NC	GH35_ORYSJ	Probable indole-3-acetic acid-amido synthetase GH3.5
TRINITY_DN3907_c0_g1	-1.915355361	6.01E-06	DOWN	-2.170067379	2.48E-07	DOWN	-0.26428121	1	NC	PYRC_ORYSJ	Dihydroorotase, mitochondrial
TRINITY_DN583_c3_g2	1.526660026	0.000480162	UP	0.718259937	0.1662264	NC	-0.818811328	0.195962217	NC	Y1500_ARATH	Probable tyrosine-protein phosphatase At1g05000
TRINITY_DN5167_c0_g1	4.382083102	2.17E-22	UP	3.995032455	1.63E-19	UP	-0.396706116	0.953650489	NC
TRINITY_DN2470_c0_g1	-3.29330887	1.49E-13	DOWN	-2.388628764	3.52E-08	DOWN	0.895874846	0.186665096	NC	UXS2_ARATH	UDP-glucuronic acid decarboxylase 2
TRINITY_DN2765_c0_g2	13.38520318	1.20E-50	UP	12.68183508	5.01E-45	UP	-0.746907109	0.27901144	NC	EF1A0_XENLA	Elongation factor 1-alpha, somatic form
TRINITY_DN3632_c2_g1	-1.324598461	0.002373986	DOWN	-0.925019245	0.047526637	NC	0.390325129	0.965161513	NC	MGST3_MOUSE	Microsomal glutathione S-transferase 3
TRINITY_DN4654_c0_g1	2.929970609	1.56E-08	NC	3.77578696	8.21E-14	UP	0.836511556	0.193393591	NC
TRINITY_DN1610_c0_g1	3.903257773	2.51E-18	UP	1.982754791	6.67E-06	UP	-1.930500209	1.07E-05	DOWN
TRINITY_DN4896_c0_g1	3.908692997	1.63E-18	UP	3.526976255	9.01E-16	UP	-0.391277417	0.965391327	NC	PPDK_MESCR	Pyruvate, phosphate dikinase, chloroplastic
TRINITY_DN16668_c0_g1	-1.658354479	0.000136636	DOWN	0.29662453	0.672125979	NC	1.945569895	1.10E-05	UP
TRINITY_DN17479_c0_g1	1.075289822	0.025401055	UP	1.234170459	0.008257882	UP	0.149468949	1	NC	WAKLQ_ARATH	Wall-associated receptor kinase-like 20
TRINITY_DN317_c0_g2	1.342420722	0.00205467	UP	1.56321839	0.000247152	UP	0.211438878	1	NC	HIP26_ARATH	Heavy metal-associated isoprenylated plant protein 26
TRINITY_DN2479_c0_g2	3.066913818	4.19E-12	UP	3.022234647	6.74E-12	UP	-0.0543622	1	NC
TRINITY_DN4398_c0_g2	-0.869775581	0.087631149	NC	1.397084976	0.001698891	UP	2.257851615	2.88E-07	UP	P2C25_ARATH	Probable protein phosphatase 2C 25
TRINITY_DN75_c0_g3	1.167701117	0.010851115	UP	0.554305641	0.333030323	NC	-0.622590195	0.497342718	NC
TRINITY_DN6991_c1_g1	0.565052635	0.363849837	NC	1.747885634	0.000114475	UP	1.173977119	0.022050039	UP
TRINITY_DN6663_c0_g1	-2.91247783	5.07E-08	NC	2.119153467	1.57E-06	UP	5.028578158	8.73E-23	UP
TRINITY_DN699_c0_g2	-1.057636296	0.022703589	DOWN	-1.092944028	0.017190842	DOWN	-0.044656582	1	NC
TRINITY_DN32819_c0_g1	-1.113650746	0.013127653	DOWN	-0.835150551	0.081719111	NC	0.269133492	1	NC	RS252_ARATH	40S ribosomal protein S25-2
TRINITY_DN471_c1_g1	-1.065875233	0.019041635	DOWN	1.389156414	0.001321109	UP	2.445336924	1.16E-08	UP	PBP1_ARATH	Calcium-binding protein PBP1
TRINITY_DN4919_c0_g1	-1.045191006	0.02174411	DOWN	-1.71156379	5.25E-05	DOWN	-0.675874475	0.385670551	NC	LRP6A_ARATH	La-related protein 6A
TRINITY_DN8442_c0_g1	2.407669018	1.01E-07	UP	2.676595355	2.62E-09	UP	0.261968575	1	NC	R13L1_ARATH	Putative disease resistance RPP13-like protein 1
TRINITY_DN5493_c0_g1	2.065349808	2.34E-05	NC	2.592102416	4.81E-08	UP	0.517332301	0.747018914	NC
TRINITY_DN11605_c0_g1	0	1	NC	10.49426732	4.14E-51	UP	10.69953247	2.00E-56	UP	MPR_BACSU	Extracellular metalloprotease
TRINITY_DN4326_c0_g2	-0.848373985	0.084328968	NC	-1.094978386	0.017213251	DOWN	-0.255657144	1	NC	COPIA_DROME	Copia protein
TRINITY_DN10642_c0_g2	1.001404375	0.031248114	UP	0.870974118	0.069755403	NC	-0.139622751	1	NC	DRL21_ARATH	Putative disease resistance protein At3g14460
TRINITY_DN130975_c0_g1	-1.18039925	0.01116322	DOWN	-1.554084529	0.00054849	DOWN	-0.380981062	1	NC	TRMD_SHISS	tRNA (guanine-N(1)-)-methyltransferase {ECO:0000255|HAMAP-Rule:MF_00605}
TRINITY_DN7450_c0_g2	0.293255937	0.672930715	NC	1.228643972	0.005667151	UP	0.9259382	0.103038516	NC	Y3264_ARATH	Putative UPF0481 protein At3g02645
TRINITY_DN4584_c0_g1	1.651440334	0.000155449	UP	-0.234176744	0.765674503	NC	-1.89526482	1.99E-05	DOWN	Y5639_ARATH	Probable leucine-rich repeat receptor-like protein kinase At5g63930
TRINITY_DN10651_c1_g6	0.034342496	0.974256019	NC	-5.843460056	9.87E-26	NC	-5.899814555	1.47E-26	DOWN
TRINITY_DN317_c10_g1	1.414994929	0.001296315	UP	1.606821816	0.000200818	UP	0.18247852	1	NC	TCP24_ARATH	Transcription factor TCP24
TRINITY_DN1343_c2_g2	4.225359075	7.52E-20	UP	4.451345177	9.07E-22	UP	0.216957056	1	NC	BEL1_ARATH	Homeobox protein BEL1 homolog
TRINITY_DN3769_c0_g1	-0.894598628	0.069792759	NC	-3.908954407	6.04E-17	DOWN	-3.025421001	8.18E-11	DOWN
TRINITY_DN35588_c0_g1	1.16331662	0.009830545	UP	1.166215032	0.009363175	UP	-0.006655543	1	NC	STEP1_ARATH	Stress enhanced protein 1, chloroplastic
TRINITY_DN12376_c0_g1	-1.51820551	0.000546135	DOWN	0.813899776	0.097953493	NC	2.322955665	9.35E-08	UP	MYB4_ORYSJ	Myb-related protein Myb4
TRINITY_DN2991_c0_g1	-1.36773445	0.001645349	DOWN	-1.53959554	0.000314464	DOWN	-0.181446989	1	NC	CYSZ_CUCMA	Citrate synthase, glyoxysomal
TRINITY_DN56654_c0_g1	0.924396173	0.048999977	NC	1.515387107	0.000395774	UP	0.581843523	0.563512422	NC
TRINITY_DN5196_c1_g1	-2.265245991	8.22E-08	DOWN	-2.253838487	9.01E-08	DOWN	0.001971819	1	NC
TRINITY_DN4132_c0_g1	-1.16333022	0.009294956	DOWN	-1.250651299	0.004505419	DOWN	-0.096951166	1	NC	STLP2_ARATH	SEC12-like protein 2
TRINITY_DN8706_c0_g1	0.852759104	0.075895557	NC	1.041647425	0.021798965	UP	0.179584197	1	NC	RD21A_ARATH	Cysteine proteinase RD21a
TRINITY_DN4599_c0_g1	0.735988773	0.15604801	NC	1.086387492	0.019057645	UP	0.340786565	1	NC	BH077_ARATH	Transcription factor bHLH77
TRINITY_DN2211_c1_g2	-1.00349889	0.035492441	DOWN	-1.473870235	0.000896181	DOWN	-0.480240355	0.817966048	NC	UBC34_ARATH	Ubiquitin-conjugating enzyme E2 34
TRINITY_DN381_c0_g5	1.489888214	0.000686574	UP	1.531425137	0.000445477	UP	0.031116975	1	NC
TRINITY_DN19998_c0_g1	-0.864838563	0.072118586	NC	-1.069994967	0.018378125	DOWN	-0.21436192	1	NC	PANB1_ARATH	3-methyl-2-oxobutanoate hydroxymethyltransferase 1, mitochondrial
TRINITY_DN12738_c0_g1	10.03357746	2.33E-24	NC	10.25864131	3.01E-26	UP	0.18182421	1	NC
TRINITY_DN7528_c1_g1	-0.731288142	0.153094401	NC	-1.094749207	0.016775234	DOWN	-0.372867177	1	NC	SPSA4_ARATH	Probable sucrose-phosphate synthase 4
TRINITY_DN15308_c0_g1	7.686193698	5.66E-10	NC	10.65454141	1.84E-28	UP	2.926034511	1.24E-10	UP	HGP3_HAEIN	Probable hemoglobin and hemoglobin-haptoglobin-binding protein 3
TRINITY_DN15084_c0_g1	-5.876164079	1.52E-27	DOWN	-3.403938059	6.81E-14	DOWN	2.47321711	3.52E-05	NC
TRINITY_DN15856_c0_g2	1.239061929	0.00580427	UP	0.943859257	0.046920376	NC	-0.304983814	1	NC	BH115_ARATH	Transcription factor bHLH115
TRINITY_DN2212_c0_g1	-1.07448023	0.018340819	DOWN	-3.452931719	1.52E-15	DOWN	-2.388561405	4.13E-08	DOWN	MCM2_ORYSJ	DNA replication licensing factor MCM2
TRINITY_DN953_c0_g1	1.67065443	8.78E-05	UP	1.404677201	0.001180624	UP	-0.2752518	1	NC	Y3028_ARATH	Uncharacterized acetyltransferase At3g50280
TRINITY_DN641_c1_g1	1.399272057	0.001262336	UP	-0.909171571	0.054157793	NC	-2.318277092	7.00E-08	DOWN
TRINITY_DN940_c0_g1	-0.915463763	0.052460866	NC	-1.233278986	0.00517748	DOWN	-0.3268579	1	NC
TRINITY_DN4900_c0_g1	2.535694681	1.52E-09	UP	2.140642464	3.15E-07	UP	-0.40448449	0.93826105	NC	RCA_MALDO	Ribulose bisphosphate carboxylase/oxygenase activase, chloroplastic
TRINITY_DN19410_c0_g1	11.19828282	1.65E-32	UP	0	1	NC	-11.61703177	3.10E-41	DOWN	RLA1_ALTAL	60S acidic ribosomal protein P1
TRINITY_DN3517_c0_g1	1.197537226	0.009479618	UP	1.008086405	0.034051951	UP	-0.199333399	1	NC	PPH_ARATH	Pheophytinase, chloroplastic
TRINITY_DN4275_c0_g1	0.955546704	0.0605233	NC	1.297730276	0.005614396	UP	0.332680667	1	NC	MSH4_ARATH	DNA mismatch repair protein MSH4
TRINITY_DN4052_c0_g1	1.283075577	0.005616769	UP	1.424076434	0.00168777	UP	0.131343722	1	NC	FPGS2_ARATH	Folylpolyglutamate synthase {ECO:0000250|UniProtKB:Q05932, ECO:0000312|EMBL:CAC81075.1}
TRINITY_DN969_c0_g4	0.629875477	0.256176957	NC	-1.375364946	0.003214904	NC	-2.015411767	9.06E-06	DOWN
TRINITY_DN10312_c0_g1	1.468655858	0.000920091	UP	1.381666823	0.001985562	UP	-0.096350225	1	NC
TRINITY_DN6307_c0_g1	0.775039247	0.167864127	NC	1.466279754	0.001803421	UP	0.681874464	0.418417879	NC	PPR41_ARATH	Putative pentatricopeptide repeat-containing protein At1g13630
TRINITY_DN10551_c0_g1	-1.124389688	0.019964608	NC	0.148092404	0.860743058	NC	1.263413106	0.012374346	UP	LORF2_MOUSE	LINE-1 retrotransposable element ORF2 protein
TRINITY_DN13943_c0_g2	1.261245326	0.004327793	UP	0.823427045	0.090199859	NC	-0.447580024	0.848978005	NC	Y2766_ARATH	Uncharacterized protein At2g37660, chloroplastic
TRINITY_DN10805_c0_g1	4.005410451	1.74E-17	UP	3.789881951	5.38E-16	UP	-0.225666138	1	NC
TRINITY_DN6023_c0_g2	-1.755850067	4.81E-05	DOWN	-0.86919418	0.072735681	NC	0.877094554	0.149971299	NC	PXG4_ARATH	Probable peroxygenase 4
TRINITY_DN15484_c0_g1	2.913045151	1.05E-11	UP	3.474940435	1.03E-15	UP	0.551681595	0.641580791	NC
TRINITY_DN6223_c0_g1	-1.286927027	0.003393244	DOWN	-1.261041597	0.00412241	DOWN	0.016409926	1	NC	TTC1_HUMAN	Tetratricopeptide repeat protein 1
TRINITY_DN2619_c1_g2	-2.155627176	1.09E-06	DOWN	-2.68151074	1.22E-09	DOWN	-0.536230965	0.754032693	NC
TRINITY_DN12168_c0_g4	1.015649559	0.030364533	UP	0.567277258	0.312105429	NC	-0.458439182	0.837526314	NC	BPM3_ARATH	BTB/POZ and MATH domain-containing protein 3
TRINITY_DN466_c0_g3	2.89808662	5.82E-11	UP	1.263154387	0.008047739	UP	-1.644611496	0.000307668	DOWN
TRINITY_DN6993_c0_g1	3.347193025	4.15E-13	UP	3.83396847	1.35E-16	UP	0.477188377	0.80003113	NC
TRINITY_DN1628_c1_g4	1.244146059	0.005217199	UP	2.069278289	9.33E-07	UP	0.815702634	0.193388475	NC	PLY5_ARATH	Probable pectate lyase 5
TRINITY_DN2133_c0_g1	1.218141423	0.005984223	UP	1.202339301	0.006636447	UP	-0.025100218	1	NC	BLH1_ARATH	BEL1-like homeodomain protein 1
TRINITY_DN1867_c1_g2	-1.681406011	0.000163174	DOWN	-0.843894448	0.09398011	NC	0.827529833	0.222049449	NC
TRINITY_DN3320_c1_g1	1.125674202	0.012723374	UP	0.814178069	0.095379719	NC	-0.320859504	1	NC	PXL2_ARATH	Leucine-rich repeat receptor-like protein kinase PXL2
TRINITY_DN7804_c0_g1	-3.340834019	1.37E-14	DOWN	-2.125471534	4.96E-07	DOWN	1.205950416	0.017430904	UP
TRINITY_DN2599_c0_g1	1.449923584	0.000860758	UP	1.43911633	0.000922466	UP	-0.020310639	1	NC	TET2_ARATH	Tetraspanin-2
TRINITY_DN979_c0_g1	1.786435888	2.39E-05	UP	0.792800638	0.104849125	NC	-1.003229343	0.061070801	NC
TRINITY_DN12544_c0_g1	-1.62928635	0.000251084	DOWN	-0.940519756	0.052620665	NC	0.679673699	0.427967998	NC	RLA0_SOYBN	60S acidic ribosomal protein P0
TRINITY_DN4585_c3_g1	11.53493622	3.17E-35	UP	12.85967164	1.99E-46	UP	1.280950758	0.007959324	UP	RS27A_CHICK	Ubiquitin-40S ribosomal protein S27a
TRINITY_DN7081_c0_g1	1.808891756	3.87E-05	UP	1.772229533	5.71E-05	UP	-0.04624547	1	NC	CB2_CHLMO	Chlorophyll a-b binding protein of LHCII type I, chloroplastic
TRINITY_DN6735_c0_g1	2.510353696	2.65E-09	UP	2.435909764	7.02E-09	UP	-0.083914888	1	NC	OLE96_ARATH	Pollen-specific protein-like At4g18596
TRINITY_DN15091_c0_g1	0	1	NC	11.60365145	3.51E-36	UP	11.97905009	3.24E-44	UP
TRINITY_DN2618_c0_g5	0.381529838	0.588722049	NC	2.115192276	2.32E-06	UP	1.723703212	0.000202835	UP	PALY_HELAN	Phenylalanine ammonia-lyase
TRINITY_DN139151_c0_g1	0	1	NC	10.95632996	7.08E-31	UP	11.33104746	6.62E-39	UP	PR1A_HORVU	Pathogenesis-related protein 1A/1B
TRINITY_DN1980_c0_g2	-2.322041663	3.39E-08	DOWN	-2.207119009	1.48E-07	DOWN	0.105409298	1	NC	Y1853_ARATH	Receptor-like serine/threonine-protein kinase At1g78530
TRINITY_DN73917_c0_g2	3.297247638	1.80E-12	UP	3.714160956	1.98E-15	UP	0.407093918	0.944867808	NC	ATL72_ARATH	RING-H2 finger protein ATL72
TRINITY_DN6450_c0_g1	1.535236499	0.000944383	UP	1.905602414	2.35E-05	UP	0.361059802	1	NC	DOF46_ARATH	Dof zinc finger protein DOF4.6
TRINITY_DN25735_c0_g1	8.176818687	1.36E-12	NC	10.47802326	4.26E-27	UP	2.258588461	6.72E-07	UP	DHE3_DICDI	Glutamate dehydrogenase, mitochondrial
TRINITY_DN138282_c0_g1	0	1	NC	10.56228582	9.46E-28	UP	10.93693814	9.20E-36	UP
TRINITY_DN2657_c0_g2	3.049586446	2.50E-11	UP	3.433814573	4.78E-14	UP	0.373824739	1	NC
TRINITY_DN22052_c0_g1	1.101295628	0.029354521	NC	1.86982393	3.94E-05	UP	0.759085477	0.29388888	NC
TRINITY_DN8962_c0_g1	1.891316644	7.32E-06	UP	1.709346875	5.49E-05	UP	-0.191591874	1	NC	IAA7_ARATH	Auxin-responsive protein IAA7
TRINITY_DN197_c0_g4	-3.166154418	1.05E-13	DOWN	-1.819239344	1.63E-05	DOWN	1.337605939	0.004873546	UP	NAC2_ARATH	NAC domain-containing protein 2
TRINITY_DN6640_c1_g1	1.199815557	0.006982683	UP	1.549792711	0.000293727	UP	0.340426346	1	NC
TRINITY_DN3200_c0_g1	1.3194393	0.00249439	UP	1.512414278	0.000407581	UP	0.183473933	1	NC	Y381_RICFE	Putative ankyrin repeat protein RF_0381
TRINITY_DN5358_c0_g2	7.683287783	7.19E-10	NC	10.42304623	1.15E-26	UP	2.698159615	2.52E-09	UP	RS30_SCHPO	40S ribosomal protein S30
TRINITY_DN10295_c0_g1	1.830641647	3.18E-05	UP	1.885286327	1.65E-05	UP	0.04516092	1	NC	OCT4_ARATH	Organic cation/carnitine transporter 4
TRINITY_DN4120_c1_g1	-1.757213759	7.26E-05	DOWN	-1.629816005	0.000251479	DOWN	0.118041066	1	NC	WRK23_ARATH	Probable WRKY transcription factor 23
TRINITY_DN5245_c0_g1	1.087690943	0.017006147	UP	1.212684248	0.006403933	UP	0.11554274	1	NC	ANT_ARATH	AP2-like ethylene-responsive transcription factor ANT
TRINITY_DN1504_c3_g2	3.396046234	2.47E-13	UP	2.355985984	4.54E-07	NC	-1.05007503	0.051030237	NC	C82A3_SOYBN	Cytochrome P450 82A3
TRINITY_DN1300_c3_g1	-1.541791992	0.000434594	DOWN	-1.324265448	0.002885046	DOWN	0.207343822	1	NC
TRINITY_DN19197_c0_g1	7.690818031	1.66E-29	UP	7.511117848	1.48E-28	UP	-0.193004721	1	NC	PMA1_NEUCR	Plasma membrane ATPase
TRINITY_DN12462_c0_g1	1.021796694	0.040365649	UP	0.110679109	0.917893871	NC	-0.920847489	0.12389733	NC
TRINITY_DN38506_c0_g1	11.76181619	4.56E-37	UP	11.83478354	4.34E-38	UP	0.029372624	1	NC	EF1A_SORMA	Elongation factor 1-alpha
TRINITY_DN17211_c0_g1	7.911126812	3.72E-11	NC	10.16099168	1.71E-25	UP	2.207313786	1.94E-06	UP	QCR9_BOVIN	Cytochrome b-c1 complex subunit 9
TRINITY_DN18510_c0_g1	7.212421888	1.42E-08	NC	10.09784356	4.95E-25	UP	2.844093068	9.01E-10	UP	RL40_NEUCR	Ubiquitin-60S ribosomal protein L40
TRINITY_DN12913_c0_g1	9.248592117	1.22E-18	NC	11.16529081	1.38E-32	UP	1.873061592	3.41E-05	UP	MYLKA_DICDI	Myosin light chain kinase A
TRINITY_DN5004_c0_g1	-1.40818076	0.001153044	DOWN	-1.005384183	0.02826894	DOWN	0.393316996	0.960129539	NC	ACLB1_ORYSJ	ATP-citrate synthase beta chain protein 1
TRINITY_DN9487_c0_g1	8.688702178	1.22E-28	UP	9.380422073	6.77E-34	UP	0.673669429	0.408644633	NC	RL3_MOUSE	60S ribosomal protein L3
TRINITY_DN1973_c0_g2	0.452728765	0.484024624	NC	1.030467632	0.033181968	UP	0.568044981	0.628669898	NC	RAA5C_ARATH	Ras-related protein RABA5c
TRINITY_DN3390_c0_g1	1.56662408	0.001014857	UP	1.327493783	0.007101756	NC	-0.247849412	1	NC
TRINITY_DN61477_c0_g1	2.935113491	6.17E-11	UP	2.292812082	2.85E-07	NC	-0.654106705	0.454979284	NC	NLTP_BETVU	Non-specific lipid-transfer protein
TRINITY_DN130613_c0_g1	-1.220389511	0.006570428	DOWN	-0.797084826	0.10716619	NC	0.413911345	0.932816497	NC
TRINITY_DN8840_c0_g1	1.033351956	0.024057536	UP	1.253700706	0.00438152	UP	0.211124006	1	NC	FLA8_ARATH	Fasciclin-like arabinogalactan protein 8
TRINITY_DN8064_c0_g1	1.575619355	0.00031999	UP	1.529266714	0.000456624	UP	-0.0560155	1	NC	Y5344_ARATH	Probable LRR receptor-like serine/threonine-protein kinase At1g53440
TRINITY_DN7129_c0_g1	2.422617541	5.92E-08	UP	-0.450980607	0.514847192	NC	-2.883917168	9.72E-11	DOWN
TRINITY_DN11936_c0_g3	1.108280872	0.019294295	UP	-0.273958128	0.699524864	NC	-1.392653268	0.003389714	DOWN
TRINITY_DN1144_c2_g1	-0.946978325	0.042075454	NC	-1.395054205	0.001224353	DOWN	-0.455056339	0.832543769	NC	YCF68_EUCGG	Uncharacterized protein ycf68
TRINITY_DN20187_c0_g1	-1.575283915	0.000290148	DOWN	-1.208977554	0.006993138	DOWN	0.356809252	1	NC	OPR11_ORYSJ	Putative 12-oxophytodienoate reductase 11
TRINITY_DN3674_c0_g3	1.183233173	0.010545053	UP	1.130537777	0.015045542	UP	-0.062652428	1	NC	PBS1_ARATH	Serine/threonine-protein kinase PBS1
TRINITY_DN4845_c0_g3	0	1	NC	10.17539041	1.33E-25	UP	3.257317063	4.51E-12	UP	ATP18_SCHPO	ATP synthase subunit J, mitochondrial
TRINITY_DN2981_c0_g2	1.639039493	0.000149414	UP	1.682000154	9.24E-05	UP	0.033275629	1	NC	TDX_ARATH	TPR repeat-containing thioredoxin TDX
TRINITY_DN3523_c0_g1	0.811439705	0.102804653	NC	-1.12833254	0.013986506	DOWN	-1.949609367	1.04E-05	DOWN
TRINITY_DN10416_c0_g1	6.986957246	5.34E-25	UP	8.358632625	8.50E-36	UP	1.358796577	0.004502087	UP	IF5A_CANAL	Eukaryotic translation initiation factor 5A
TRINITY_DN26_c0_g1	1.095891075	0.015239808	UP	0.724934755	0.1502243	NC	-0.380516655	0.983364679	NC	P4KG7_ARATH	Phosphatidylinositol 4-kinase gamma 7
TRINITY_DN6633_c0_g1	1.861000673	2.51E-05	UP	1.731406928	9.77E-05	UP	-0.139598711	1	NC
TRINITY_DN3458_c1_g1	4.382364411	1.13E-19	UP	4.23903382	1.16E-18	UP	-0.153272391	1	NC	Y5977_ARATH	Probable leucine-rich repeat receptor-like protein kinase At5g49770
TRINITY_DN2801_c0_g1	-1.267547683	0.00386105	DOWN	-1.24211802	0.004672213	DOWN	0.015926419	1	NC	ANXD6_ARATH	Annexin D6
TRINITY_DN9229_c0_g2	5.341081418	9.94E-26	UP	4.874854984	2.92E-22	UP	-0.476398296	0.801066474	NC	GUN_PAEPO	Endoglucanase
TRINITY_DN1024_c2_g1	2.280287069	1.17E-07	UP	2.082417232	1.32E-06	UP	-0.207506739	1	NC	3MG1_ECOLI	DNA-3-methyladenine glycosylase 1
TRINITY_DN7572_c1_g4	8.671989909	1.12E-15	NC	11.51398722	1.90E-35	UP	2.798860678	2.44E-10	UP	RLA0_SOYBN	60S acidic ribosomal protein P0
TRINITY_DN5245_c0_g4	0.680188014	0.202950056	NC	1.020427156	0.030508678	UP	0.330016216	1	NC
TRINITY_DN32295_c0_g1	-2.907417156	8.04E-12	DOWN	-2.861587592	1.47E-11	DOWN	0.038343411	1	NC
TRINITY_DN495_c3_g1	1.610611085	0.000261547	UP	1.362147397	0.002495666	UP	-0.257903996	1	NC
TRINITY_DN74306_c0_g1	-0.774894786	0.115606788	NC	-1.246361175	0.004492521	DOWN	-0.4784314	0.785519063	NC
TRINITY_DN8976_c0_g1	1.508564009	0.002594056	UP	-2.524394769	5.36E-06	NC	-4.046454122	1.62E-15	DOWN
TRINITY_DN5975_c0_g2	-1.361648624	0.002379589	DOWN	-0.827555159	0.095379719	NC	0.524713289	0.712049863	NC	EIF3G_XENTR	Eukaryotic translation initiation factor 3 subunit G {ECO:0000255|HAMAP-Rule:MF_03006}
TRINITY_DN36659_c0_g1	-2.485989722	3.25E-08	DOWN	-3.832109342	7.53E-16	DOWN	-1.357360644	0.021370284	NC
TRINITY_DN2315_c2_g1	-1.116208439	0.013249581	DOWN	-1.412091655	0.001097963	DOWN	-0.305481258	1	NC	AASS_ARATH	Alpha-aminoadipic semialdehyde synthase
TRINITY_DN22870_c0_g2	3.713287029	9.30E-16	UP	3.023342196	4.45E-11	UP	-0.700051451	0.360897457	NC	GATA4_ARATH	GATA transcription factor 4
TRINITY_DN3580_c0_g1	2.421042071	3.02E-07	UP	2.529543156	7.16E-08	UP	0.099029938	1	NC	ORTH2_ARATH	E3 ubiquitin-protein ligase ORTHRUS 2
TRINITY_DN5710_c0_g1	-1.4290174	0.001577625	DOWN	-0.502000315	0.398524382	NC	0.918123974	0.129295616	NC	DREB3_ARATH	Dehydration-responsive element-binding protein 3
TRINITY_DN6524_c0_g1	0	1	NC	10.39694998	1.91E-26	UP	4.908202043	3.32E-21	UP	RL37_EMENI	60S ribosomal protein L37
TRINITY_DN4650_c2_g1	-1.478392155	0.000596646	DOWN	-1.428139615	0.000928432	DOWN	0.040814037	1	NC	USPAL_ARATH	Universal stress protein A-like protein
TRINITY_DN2274_c0_g1	1.845475239	1.27E-05	UP	0.38626239	0.539172443	NC	-1.468653875	0.001386378	DOWN	GRF5_ORYSJ	Growth-regulating factor 5
TRINITY_DN2407_c0_g1	1.015640812	0.028319229	UP	0.851197883	0.078398887	NC	-0.174027587	1	NC	MSOX_BACB0	Monomeric sarcosine oxidase
TRINITY_DN450_c1_g4	1.717062265	7.51E-05	UP	1.836905683	1.95E-05	UP	0.110114297	1	NC	SD17_ARATH	Receptor-like serine/threonine-protein kinase SD1-7
TRINITY_DN8058_c0_g1	-1.148123386	0.013092304	DOWN	-0.271742631	0.711170695	NC	0.866863977	0.16219762	NC	WOX8_ORYSJ	WUSCHEL-related homeobox 8
TRINITY_DN1451_c0_g1	1.241804383	0.00571691	UP	1.121074367	0.01405429	UP	-0.130150881	1	NC	BCS1B_DICDI	Probable mitochondrial chaperone BCS1-B
TRINITY_DN52286_c0_g1	-1.738850902	6.66E-05	DOWN	-0.862838105	0.077599226	NC	0.866405558	0.163272468	NC
TRINITY_DN6723_c0_g1	-1.833818327	2.31E-05	DOWN	-1.727651524	6.73E-05	DOWN	0.09650531	1	NC	POLX_TOBAC	Retrovirus-related Pol polyprotein from transposon TNT 1-94
TRINITY_DN11196_c1_g1	0	1	NC	11.14915605	1.89E-32	UP	11.52397629	1.75E-40	UP	SCR_IPONI	Protein SCARECROW
TRINITY_DN506_c1_g3	-2.893874513	1.05E-11	DOWN	-2.684427869	2.14E-10	DOWN	0.20000748	1	NC	AXX15_SOYBN	Auxin-induced protein X15
TRINITY_DN24107_c1_g1	-3.366580393	1.95E-14	DOWN	-12.2200481	2.02E-45	DOWN	-9.237082905	2.01E-22	NC
TRINITY_DN11130_c0_g1	1.555179165	0.000521035	UP	0.833659655	0.102223454	NC	-0.731709204	0.315332266	NC	CK2_ARATH	Probable choline kinase 2
TRINITY_DN2171_c0_g1	11.65092125	3.62E-36	UP	11.35321811	4.04E-34	UP	-0.341795916	1	NC	P2C80_ARATH	Probable protein phosphatase 2C 80
TRINITY_DN13676_c0_g1	-0.108554352	0.908800113	NC	2.556089936	3.03E-09	UP	2.655342792	1.03E-09	UP
TRINITY_DN14017_c0_g1	-1.105805246	0.015245779	DOWN	-0.505047862	0.381056996	NC	0.591319155	0.557001087	NC	R13L1_ARATH	Putative disease resistance RPP13-like protein 1
TRINITY_DN5566_c0_g3	-0.490772922	0.40981231	NC	-1.129659431	0.014011956	DOWN	-0.648345457	0.455896555	NC
TRINITY_DN591_c1_g1	-1.338447566	0.003113093	DOWN	-1.60811598	0.000269324	DOWN	-0.278844439	1	NC	DNJH2_ALLPO	DnaJ protein homolog 2
TRINITY_DN8325_c0_g1	-2.167623294	3.23E-07	DOWN	-2.206110766	1.92E-07	DOWN	-0.048219049	1	NC	P24B3_ARATH	Transmembrane emp24 domain-containing protein p24beta3
TRINITY_DN14694_c0_g2	1.251234209	0.007326309	UP	1.085054147	0.023089948	UP	-0.176239022	1	NC	YCF3_POPTR	Photosystem I assembly protein Ycf3 {ECO:0000255|HAMAP-Rule:MF_00439}
TRINITY_DN1737_c1_g1	1.032064865	0.023712916	UP	1.130290886	0.011340385	UP	0.088814785	1	NC	PSBP_PEA	Oxygen-evolving enhancer protein 2, chloroplastic
TRINITY_DN2988_c0_g1	-0.227555634	0.762043679	NC	1.293315763	0.003419842	UP	1.511573399	0.000991476	UP	MYB39_ARATH	Transcription factor MYB39
TRINITY_DN3828_c0_g3	-4.942043652	1.84E-27	DOWN	-4.37085929	4.58E-23	DOWN	0.561921726	0.606964622	NC	HSP21_SOYBN	17.9 kDa class II heat shock protein
TRINITY_DN15174_c1_g3	9.191576123	3.03E-18	NC	11.6485236	1.51E-36	UP	2.413745686	4.03E-08	UP	RL32_NEUCR	60S ribosomal protein L32
TRINITY_DN6397_c0_g1	2.209666474	1.32E-06	UP	-0.220878997	0.827566566	NC	-2.441163656	8.22E-08	DOWN
TRINITY_DN7675_c0_g1	-2.562867627	9.84E-09	DOWN	-1.583263822	0.000439766	DOWN	0.97165882	0.120615642	NC	AB22G_ARATH	ABC transporter G family member 22
TRINITY_DN9998_c0_g1	10.41180644	3.16E-27	UP	11.6341504	1.99E-36	UP	1.178502678	0.019727214	UP	RS28_NEUCR	40S ribosomal protein S28
TRINITY_DN6954_c0_g1	-0.868461267	0.072118586	NC	-1.247881139	0.004921918	DOWN	-0.388783156	0.976174089	NC
TRINITY_DN7195_c0_g1	-1.087763326	0.017758007	DOWN	-0.769067411	0.124423721	NC	0.309220007	1	NC	PNAA_PRUDU	Peptide-N4-(N-acetyl-beta-glucosaminyl)asparagine amidase A
TRINITY_DN9610_c1_g1	-0.727670829	0.162725629	NC	-1.344765874	0.002738987	DOWN	-0.626670987	0.50888284	NC	NAGS2_ARATH	Probable amino-acid acetyltransferase NAGS2, chloroplastic
TRINITY_DN5447_c1_g3	-0.172972608	0.822554057	NC	2.377992523	1.19E-07	UP	2.542120961	8.28E-09	UP
TRINITY_DN3375_c0_g1	-0.76090224	0.128082823	NC	-1.13570812	0.01150853	DOWN	-0.384202228	0.98107485	NC	Y5713_ARATH	PI-PLC X domain-containing protein At5g67130
TRINITY_DN3813_c2_g1	1.197043026	0.010031731	UP	1.19896121	0.009881396	UP	-0.008059028	1	NC
TRINITY_DN17675_c0_g4	0	1	NC	10.61683188	3.65E-28	UP	5.248608752	1.32E-23	UP	RAP1_PHYPO	Ras-related protein Rap-1
TRINITY_DN13688_c0_g1	-3.585287956	2.84E-16	DOWN	-5.181110204	5.35E-28	DOWN	-1.608868195	0.001005841	NC
TRINITY_DN434_c3_g2	-1.69681391	7.84E-05	DOWN	-0.417816862	0.496700295	NC	1.269706552	0.00904613	UP
TRINITY_DN3373_c0_g1	-3.545741661	1.72E-16	DOWN	-3.164686797	8.64E-14	DOWN	0.371532989	1	NC	CAX3_ARATH	Vacuolar cation/proton exchanger 3
TRINITY_DN4023_c0_g1	1.788114454	2.70E-05	UP	0.896021181	0.060608073	NC	-0.901614516	0.118060679	NC
TRINITY_DN11313_c0_g3	9.533639571	1.16E-20	NC	10.55405696	1.10E-27	UP	0.977050293	0.088346724	NC	SR4_PHYPO	Spherulin-4
TRINITY_DN7864_c0_g5	-1.088077798	0.019208766	DOWN	-0.5883913	0.288018188	NC	0.490774377	0.781106964	NC	K502_ACTDE	Fruit protein pKIWI502
TRINITY_DN61966_c0_g1	-4.194046926	2.33E-20	DOWN	-2.825121749	4.15E-11	DOWN	1.360260841	0.007466691	NC	INVB_DAUCA	Beta-fructofuranosidase, soluble isoenzyme I
TRINITY_DN6620_c0_g1	1.471237075	0.001020777	UP	1.8356896	2.56E-05	UP	0.354809685	1	NC
TRINITY_DN10025_c0_g1	2.200109724	2.32E-07	UP	0.911909494	0.057814919	NC	-1.297930962	0.006795308	DOWN	Y4885_ARATH	Probable LRR receptor-like serine/threonine-protein kinase At4g08850
TRINITY_DN118_c0_g5	1.428836431	0.001148119	UP	1.15348736	0.010951037	UP	-0.28430073	1	NC	RHA2A_ARATH	E3 ubiquitin-protein ligase RHA2A
TRINITY_DN1537_c0_g1	2.877052565	2.83E-11	UP	3.013368027	3.04E-12	UP	0.126783994	1	NC	LAC3_ARATH	Laccase-3
TRINITY_DN17390_c0_g1	2.593709847	4.13E-08	NC	3.233237057	4.65E-12	UP	0.628830587	0.518744539	NC
TRINITY_DN3067_c0_g9	0.325139603	0.64197017	NC	1.504762974	0.00083116	UP	1.170497088	0.024082983	UP
TRINITY_DN875_c0_g1	11.22260858	1.07E-32	UP	0	1	NC	-11.64141593	2.00E-41	DOWN
TRINITY_DN4907_c0_g1	-2.417444339	1.01E-06	NC	1.27725036	0.00745351	UP	3.688871362	1.07E-14	UP	MYB39_ARATH	Transcription factor MYB39
TRINITY_DN4103_c0_g1	0.733879927	0.150376085	NC	1.150686054	0.010682981	UP	0.407226695	0.937930202	NC	PPD_RAPSA	Pheophorbidase
TRINITY_DN15127_c0_g1	1.009336091	0.028168433	UP	1.016902195	0.026230673	UP	-0.002310425	1	NC	Y317_RICBR	Putative ankyrin repeat protein RBE_0317
TRINITY_DN20069_c0_g2	0.585856322	0.302446779	NC	1.378380965	0.001981674	UP	0.783785617	0.23477261	NC	R13L1_ARATH	Putative disease resistance RPP13-like protein 1
TRINITY_DN3353_c2_g1	-1.820645021	2.40E-05	DOWN	-2.122164869	7.06E-07	DOWN	-0.311475339	1	NC
TRINITY_DN3366_c1_g1	0.787444589	0.149577084	NC	1.265814145	0.007606434	UP	0.469904023	0.826133987	NC
TRINITY_DN10629_c0_g1	0.725638053	0.164858941	NC	1.19754733	0.00870331	UP	0.462223573	0.831575782	NC	U496A_ARATH	UPF0496 protein At4g34320
TRINITY_DN3485_c1_g1	-0.587970263	0.292280048	NC	-1.178730753	0.00982057	DOWN	-0.600451055	0.551287955	NC
TRINITY_DN1149_c0_g1	0.768724295	0.131447234	NC	1.056069507	0.023079023	UP	0.277550869	1	NC
TRINITY_DN474_c0_g1	1.322803428	0.002904431	UP	1.573464754	0.000278817	UP	0.240985578	1	NC	YC22_ARATH	Uncharacterized calcium-binding protein At1g02270
TRINITY_DN13996_c0_g1	0.581127144	0.301010273	NC	-1.195641434	0.008983782	DOWN	-1.786117096	7.06E-05	DOWN	AGO8_ARATH	Protein argonaute 8
TRINITY_DN773_c1_g4	1.211855195	0.007381626	UP	0.905864567	0.05979811	NC	-0.315679275	1	NC	MY1R1_SOLTU	Transcription factor MYB1R1
TRINITY_DN1759_c0_g1	0.724710792	0.175208425	NC	1.123006883	0.016988353	UP	0.388757614	0.98114181	NC	TBL27_ARATH	Protein ALTERED XYLOGLUCAN 4
TRINITY_DN1438_c2_g1	-2.506604121	4.84E-09	DOWN	-0.531145092	0.348485106	NC	1.966442855	9.63E-06	UP	XTH25_ARATH	Probable xyloglucan endotransglucosylase/hydrolase protein 25
TRINITY_DN4453_c0_g1	1.013077426	0.027991219	UP	1.069121286	0.018491394	UP	0.046584095	1	NC	Y3720_ARATH	UPF0481 protein At3g47200
TRINITY_DN211_c0_g2	1.605789274	0.000220581	UP	1.556876645	0.000348753	UP	-0.058301283	1	NC	PGLR_VITVI	Probable polygalacturonase
TRINITY_DN48935_c0_g1	-1.530789031	0.000498701	DOWN	-1.402787813	0.001500078	DOWN	0.119025291	1	NC	MT2_ACTDE	Metallothionein-like protein type 2
TRINITY_DN48583_c0_g1	2.732029357	1.03E-10	UP	4.09531476	9.62E-21	UP	1.354649506	0.003937807	UP	CB24_SOLLC	Chlorophyll a-b binding protein 4, chloroplastic
TRINITY_DN2463_c0_g1	-5.034308218	1.78E-25	DOWN	-2.595968349	1.35E-09	DOWN	2.431313816	3.07E-07	NC	P2C51_ORYSJ	Probable protein phosphatase 2C 51
TRINITY_DN8632_c0_g2	10.35629956	8.31E-27	UP	0	1	NC	-10.77506104	1.84E-34	DOWN	RL29_DICDI	60S ribosomal protein L29
TRINITY_DN6968_c0_g2	1.59051509	0.000884793	UP	0.565693398	0.40330895	NC	-1.034572569	0.065432321	NC
TRINITY_DN12932_c0_g1	-2.010304202	1.94E-06	DOWN	-1.473004794	0.000635687	DOWN	0.52797054	0.687436543	NC	SERB2_ARATH	Phosphoserine aminotransferase 2, chloroplastic
TRINITY_DN11468_c0_g2	2.022360175	3.49E-06	UP	1.547210535	0.000456096	NC	-0.484011146	0.821207565	NC
TRINITY_DN2646_c1_g1	-0.666397922	0.199983914	NC	-1.264455745	0.003992271	DOWN	-0.607618323	0.515792057	NC
TRINITY_DN8120_c0_g2	1.94736215	3.78E-06	UP	1.768037678	2.88E-05	UP	-0.188866988	1	NC
TRINITY_DN115899_c0_g1	-2.656281578	9.54E-10	DOWN	-2.102026296	1.06E-06	DOWN	0.545349191	0.704789232	NC
TRINITY_DN1746_c0_g1	2.666589911	1.09E-09	UP	2.529963661	7.37E-09	UP	-0.146207616	1	NC
TRINITY_DN2357_c0_g2	-1.476807809	0.000597044	DOWN	-1.599309479	0.000171493	DOWN	-0.131233221	1	NC
TRINITY_DN2923_c0_g2	2.415067769	2.92E-08	UP	3.19477361	2.90E-13	UP	0.769851897	0.251545427	NC	AKT2_ORYSJ	Potassium channel AKT2
TRINITY_DN576_c0_g2	11.6808478	2.04E-36	UP	0	1	NC	-12.0995377	3.19E-45	DOWN	PMA1_NEUCR	Plasma membrane ATPase
TRINITY_DN39690_c0_g1	-1.882001627	7.81E-06	DOWN	-1.49997966	0.000454394	DOWN	0.373260174	0.992044181	NC
TRINITY_DN15917_c0_g2	-3.520745105	1.95E-14	DOWN	-3.511222002	1.94E-14	DOWN	0.000787372	1	NC	CKX3_ARATH	Cytokinin dehydrogenase 3
TRINITY_DN3713_c1_g1	-1.401340873	0.001334005	DOWN	-0.280984522	0.689389664	NC	1.110993469	0.030068105	UP
TRINITY_DN5738_c0_g1	2.732804836	6.99E-09	UP	3.199659794	7.81E-12	UP	0.457398364	0.845547956	NC	BCP_PEA	Blue copper protein
TRINITY_DN55560_c1_g1	2.145841193	7.83E-07	UP	1.530439479	0.00053584	NC	-0.627133057	0.5090405	NC	RL10_EUPES	60S ribosomal protein L10
TRINITY_DN5350_c0_g1	0.825847133	0.096006923	NC	1.066236916	0.020765418	UP	0.230768496	1	NC
TRINITY_DN14788_c0_g2	1.79710272	0.000120028	NC	1.890366936	4.56E-05	UP	0.08341946	1	NC	M810_ARATH	Uncharacterized mitochondrial protein AtMg00810
TRINITY_DN16308_c0_g1	0.254610634	0.741603062	NC	-1.074573714	0.024458866	DOWN	-1.341444492	0.006256531	DOWN
TRINITY_DN1722_c0_g1	2.086596119	7.40E-07	UP	1.834822931	1.45E-05	UP	-0.261178886	1	NC	TIC62_PEA	Protein TIC 62, chloroplastic
TRINITY_DN8121_c0_g1	8.584627063	4.61E-15	NC	10.64193928	2.23E-28	UP	2.014106978	9.02E-06	UP	RAC2_ORYSJ	Rac-like GTP-binding protein 2
TRINITY_DN12675_c0_g1	0	1	NC	10.72745714	4.78E-29	UP	4.068823603	1.42E-17	UP
TRINITY_DN9273_c0_g1	3.278598028	1.07E-13	UP	2.25093707	2.69E-07	UP	-1.038681062	0.050847716	NC	CLASP_ARATH	CLIP-associated protein
TRINITY_DN115259_c0_g1	-4.478791749	4.50E-22	DOWN	-4.027116149	3.94E-19	DOWN	0.442522816	0.958972135	NC
TRINITY_DN16523_c0_g1	-1.994911861	2.18E-06	DOWN	-1.592814422	0.000187333	DOWN	0.392747851	0.963650081	NC	Y3550_ARATH	REF/SRPP-like protein At3g05500
TRINITY_DN2222_c0_g1	-2.763910722	9.62E-11	DOWN	-2.446198778	7.43E-09	DOWN	0.308079359	1	NC	BGL41_ARATH	Putative beta-glucosidase 41
TRINITY_DN1326_c0_g1	0.820507577	0.100900005	NC	1.553191109	0.000361637	UP	0.723395889	0.315968098	NC
TRINITY_DN6489_c0_g1	7.567534341	2.46E-09	NC	11.11627657	3.46E-32	UP	3.506543586	1.74E-14	UP	RL27A_SCHPO	60S ribosomal protein L27-A
TRINITY_DN24420_c0_g1	-2.033563498	1.27E-06	DOWN	-2.312016468	3.18E-08	DOWN	-0.288144843	1	NC
TRINITY_DN6266_c0_g2	9.758093704	2.71E-22	NC	11.62004236	2.57E-36	UP	1.818227552	5.14E-05	UP	RL10_DICDI	60S ribosomal protein L10
TRINITY_DN2753_c0_g1	-1.875541622	1.17E-05	DOWN	-2.00522324	2.43E-06	DOWN	-0.139143471	1	NC	VIP2_MOUSE	Inositol hexakisphosphate and diphosphoinositol-pentakisphosphate kinase 2
TRINITY_DN15966_c0_g1	9.477369293	3.07E-20	NC	11.62306148	2.45E-36	UP	2.102343284	2.11E-06	UP	NIR_NEUCR	Nitrite reductase [NAD(P)H]
TRINITY_DN1901_c0_g1	-0.606782757	0.261357314	NC	-1.023643852	0.025984392	DOWN	-0.426277155	0.902069123	NC	MPK14_ORYSJ	Mitogen-activated protein kinase 14
TRINITY_DN17402_c0_g1	-0.138636027	0.864152209	NC	-1.176171663	0.008800855	DOWN	-1.046757539	0.047795294	DOWN
TRINITY_DN20393_c0_g1	-1.065303419	0.021272672	DOWN	-0.528905409	0.353481555	NC	0.526840778	0.696391178	NC	DI3L2_ARATH	DIS3-like exonuclease 2 {ECO:0000255|HAMAP-Rule:MF_03045}
TRINITY_DN1591_c0_g4	-1.963168808	6.70E-06	DOWN	-1.893669098	1.32E-05	DOWN	0.059868854	1	NC
TRINITY_DN7939_c0_g1	-3.651922595	3.84E-17	DOWN	-2.017221095	1.56E-06	DOWN	1.625559832	0.000320724	UP	DR100_ARATH	DNA-damage-repair/toleration protein DRT100
TRINITY_DN2428_c0_g1	-1.398548242	0.001296315	DOWN	-0.466143274	0.427662816	NC	0.923370447	0.104378557	NC	GAE6_ARATH	UDP-glucuronate 4-epimerase 6
TRINITY_DN116247_c0_g1	5.678166646	2.15E-19	NC	6.546461987	2.25E-26	UP	0.856246898	0.171472269	NC
TRINITY_DN4213_c0_g1	-1.302505775	0.003220919	DOWN	-0.467070848	0.429211153	NC	0.825979815	0.18813239	NC	CYSG_XYLFT	Siroheme synthase {ECO:0000255|HAMAP-Rule:MF_01646}
TRINITY_DN796_c5_g1	1.139719123	0.014216605	UP	1.327759988	0.003173108	UP	0.178612738	1	NC	SCL6_ARATH	Scarecrow-like protein 6
TRINITY_DN3960_c0_g2	1.431926182	0.002573314	UP	0.680044156	0.252278906	NC	-0.762051767	0.294967342	NC	PUR9_HELMI	Bifunctional purine biosynthesis protein PurH {ECO:0000255|HAMAP-Rule:MF_00139}
TRINITY_DN16792_c2_g1	2.577560103	3.20E-09	UP	2.499602102	8.65E-09	UP	-0.087431999	1	NC
TRINITY_DN7693_c0_g2	10.60570618	1.03E-28	UP	12.36096752	2.01E-42	UP	1.711837962	0.000139041	UP	RS4_YARLI	40S ribosomal protein S4
TRINITY_DN6451_c0_g2	1.723436311	7.78E-05	UP	0.142383313	0.866656883	NC	-1.590453921	0.000523162	DOWN
TRINITY_DN9983_c0_g1	0.926753047	0.052086881	NC	1.245625514	0.005121114	UP	0.31005475	1	NC
TRINITY_DN288_c0_g1	-1.049619719	0.021139474	DOWN	-1.180760509	0.007749662	DOWN	-0.14074558	1	NC	ACOX4_ARATH	Acyl-coenzyme A oxidase 4, peroxisomal
TRINITY_DN5544_c0_g2	-3.580948544	2.61E-14	DOWN	-3.271907063	1.01E-12	DOWN	0	1	NC
TRINITY_DN3524_c1_g1	-1.027378658	0.025260186	DOWN	-0.762385474	0.124902315	NC	0.255509104	1	NC
TRINITY_DN5490_c0_g1	-7.516353856	7.52E-33	DOWN	-9.031446725	5.29E-36	DOWN	0	1	NC	Y4323_ARATH	Uncharacterized protein At4g13230
TRINITY_DN3488_c1_g1	1.989413468	3.65E-06	UP	1.874626935	1.34E-05	UP	-0.124633384	1	NC	RGA4_SOLBU	Putative disease resistance protein RGA4
TRINITY_DN4412_c1_g1	5.084552779	2.22E-25	UP	3.857791773	3.54E-16	UP	-1.236781805	0.011563164	DOWN	TPPI_ARATH	Probable trehalose-phosphate phosphatase I
TRINITY_DN1590_c0_g2	-0.63333948	0.245272064	NC	-1.940437831	7.83E-06	DOWN	-1.316817599	0.007548088	DOWN	Y5986_ARATH	Uncharacterized protein At5g39865
TRINITY_DN5994_c0_g1	8.953023534	1.39E-16	NC	10.43889067	8.70E-27	UP	1.442438872	0.002925186	UP	YCO6_SCHPO	Putative nucleosome assembly protein C364.06
TRINITY_DN115280_c0_g1	1.665322761	0.000100105	UP	0.675731019	0.195014341	NC	-0.99930104	0.064123089	NC
TRINITY_DN6451_c0_g3	1.331553106	0.003244881	NC	1.724372974	8.09E-05	UP	0.383346578	0.991367558	NC
TRINITY_DN1388_c4_g1	-2.746049	1.13E-10	DOWN	-2.405663758	1.22E-08	DOWN	0.331016595	1	NC	RGP1_ORYSJ	UDP-arabinopyranose mutase 1
TRINITY_DN8427_c0_g1	0	1	NC	10.77975713	1.84E-29	UP	11.15442907	1.70E-37	UP	RL25_CYBJA	60S ribosomal protein L25
TRINITY_DN8685_c0_g2	10.12718989	4.66E-25	UP	0	1	NC	-10.54565235	1.31E-32	DOWN	EF1A_PICGU	Elongation factor 1-alpha
TRINITY_DN3668_c2_g2	1.800634487	2.91E-05	UP	1.646744898	0.000144002	UP	-0.163262554	1	NC
TRINITY_DN3461_c0_g1	-6.745306602	1.71E-38	DOWN	-2.189862096	2.09E-07	DOWN	4.549623542	3.91E-21	UP	BH126_ARATH	Transcription factor bHLH126
TRINITY_DN6527_c0_g1	1.964608067	7.01E-06	UP	1.819572385	3.28E-05	UP	-0.154259143	1	NC	AB8G_ARATH	ABC transporter G family member 8
TRINITY_DN4977_c0_g1	1.098308116	0.02700495	NC	2.212429173	6.24E-07	UP	1.104791042	0.035581161	UP
TRINITY_DN26920_c0_g1	10.47718333	9.84E-28	UP	0	1	NC	-10.8958014	2.04E-35	DOWN	TRYP_FUSOX	Trypsin
TRINITY_DN3632_c1_g2	1.256434839	0.004638311	UP	0.867239169	0.070890347	NC	-0.399697773	0.950936929	NC
TRINITY_DN47713_c0_g1	1.296417429	0.003635767	UP	1.060854529	0.021580527	UP	-0.245547633	1	NC
TRINITY_DN6331_c0_g1	3.214873021	3.36E-12	UP	1.903740051	6.82E-05	NC	-1.3210794	0.006574842	DOWN
TRINITY_DN76834_c0_g1	-10.57705371	1.53E-31	DOWN	-10.6114226	3.68E-32	DOWN	0	1	NC
TRINITY_DN3296_c0_g1	1.030981568	0.025936477	UP	0.936720841	0.047463622	NC	-0.10390084	1	NC	Y1919_SYNY3	Uncharacterized protein slr1919
TRINITY_DN2869_c4_g1	-1.299119277	0.002988713	DOWN	-1.014599298	0.02636046	DOWN	0.27499612	1	NC	U136_ARATH	UPF0136 membrane protein At2g26240
TRINITY_DN476_c0_g2	-1.180284069	0.008821751	DOWN	-0.126534086	0.877501575	NC	1.044503926	0.048832356	UP	UFOG6_FRAAN	UDP-glucose flavonoid 3-O-glucosyltransferase 6 {ECO:0000303|PubMed:18487633}
TRINITY_DN5746_c0_g1	-4.264517992	2.25E-20	DOWN	-2.346592572	4.12E-08	DOWN	1.909600027	5.64E-05	NC	YB8B_YEAST	Uncharacterized transporter YBR287W
TRINITY_DN11112_c0_g1	8.940779256	1.58E-16	NC	10.34008121	4.92E-26	UP	1.356264246	0.006236847	UP	PMA1_YEAST	Plasma membrane ATPase 1
TRINITY_DN2937_c1_g1	2.783723791	1.78E-08	UP	2.954690681	1.63E-09	UP	0.163037192	1	NC
TRINITY_DN5850_c1_g1	3.913655524	8.81E-18	UP	0.883219891	0.108314999	NC	-3.039787965	2.86E-12	DOWN
TRINITY_DN7430_c0_g1	2.126394587	2.61E-06	UP	2.095769416	3.43E-06	UP	-0.040434744	1	NC
TRINITY_DN2606_c1_g1	-1.334689255	0.003048874	DOWN	-1.381067865	0.00196757	DOWN	-0.056884138	1	NC
TRINITY_DN1724_c0_g2	-1.275957625	0.003710457	DOWN	-1.333803648	0.002208671	DOWN	-0.067356306	1	NC
TRINITY_DN758_c2_g1	1.377416625	0.001740314	UP	1.261062605	0.004524615	UP	-0.125990921	1	NC
TRINITY_DN16360_c0_g1	3.191425883	2.45E-10	NC	3.864128954	7.71E-15	UP	0.662384137	0.44571998	NC
TRINITY_DN6113_c1_g1	-4.723245229	2.99E-23	DOWN	-1.560197711	0.000382764	DOWN	3.159265522	6.13E-12	NC
TRINITY_DN616_c0_g2	3.766722143	9.10E-17	UP	2.206138286	8.96E-07	UP	-1.570311237	0.00060215	DOWN	KPYC_SOYBN	Pyruvate kinase, cytosolic isozyme
TRINITY_DN7373_c0_g4	1.223231223	0.008056863	UP	-0.181801741	0.838942245	NC	-1.415601221	0.003221587	DOWN	A115_TOBAC	Auxin-induced protein PCNT115
TRINITY_DN8780_c1_g1	-0.324642267	0.626772301	NC	-1.079538586	0.018090502	DOWN	-0.763868318	0.26269815	NC
TRINITY_DN6138_c0_g1	2.739140629	1.74E-08	NC	3.503047838	2.94E-13	UP	0.754230776	0.289961751	NC	MIZ1_ARATH	Protein MIZU-KUSSEI 1
TRINITY_DN8599_c0_g1	-0.239599975	0.747810801	NC	-1.869756612	1.65E-05	DOWN	-1.640579498	0.000352023	DOWN
TRINITY_DN6885_c0_g3	0.517911522	0.384265916	NC	-0.831467799	0.102223454	NC	-1.359038653	0.005181293	DOWN	Y2309_ARATH	Uncharacterized protein At2g23090
TRINITY_DN3419_c0_g1	0.332197101	0.641585901	NC	1.15366956	0.01334174	UP	0.811891054	0.212070904	NC	Y3545_ARATH	Probable receptor-like protein kinase At3g55450
TRINITY_DN8893_c0_g2	1.129598434	0.015482949	UP	0.129469661	0.878102814	NC	-1.010146609	0.068208728	NC
TRINITY_DN4268_c0_g2	8.519450965	1.05E-14	NC	12.70219484	3.40E-45	UP	4.139700409	5.33E-20	UP	RS242_ARATH	40S ribosomal protein S24-2
TRINITY_DN1988_c0_g1	0.595883634	0.268474518	NC	-1.074953358	0.017189914	DOWN	-1.680376602	0.000158948	DOWN	AGD13_ARATH	Probable ADP-ribosylation factor GTPase-activating protein AGD13
TRINITY_DN53418_c0_g1	0	1	NC	10.33075338	5.85E-26	UP	3.707844526	1.14E-14	UP
TRINITY_DN7724_c0_g1	3.069064946	2.96E-10	UP	3.571701209	1.13E-13	UP	0.492996998	0.779603319	NC
TRINITY_DN8501_c0_g1	2.311986045	4.00E-08	UP	2.587078581	7.86E-10	UP	0.265662668	1	NC	IAA26_ARATH	Auxin-responsive protein IAA26
TRINITY_DN1953_c0_g1	1.591274963	0.00021771	UP	2.132218951	4.19E-07	UP	0.531767566	0.671295267	NC	C93A1_SOYBN	3,9-dihydroxypterocarpan 6A-monooxygenase
TRINITY_DN5406_c0_g1	3.026289106	3.82E-12	UP	4.148708202	1.61E-20	UP	1.11328884	0.028463515	UP	RHA2B_ARATH	Probable E3 ubiquitin-protein ligase RHA2B
TRINITY_DN3575_c0_g1	-1.186915576	0.007690762	DOWN	-1.216207437	0.005927344	DOWN	-0.038692984	1	NC	CDKG2_ORYSJ	Cyclin-dependent kinase G-2
TRINITY_DN893_c0_g1	2.845920066	2.38E-11	UP	2.44923442	7.05E-09	UP	-0.406352359	0.937160527	NC	RUMI_DROPS	O-glucosyltransferase rumi
TRINITY_DN1508_c0_g6	-1.048479761	0.026725769	DOWN	-1.484393527	0.000849614	DOWN	-0.445881527	0.890798075	NC
TRINITY_DN2447_c0_g1	-1.672365009	0.000152758	DOWN	-1.499690996	0.000725872	DOWN	0.163304671	1	NC	C77A2_SOLME	Cytochrome P450 77A2
TRINITY_DN653_c1_g1	1.155965353	0.010692276	UP	0.91672713	0.054161227	NC	-0.24881254	1	NC	KRP3_ARATH	Cyclin-dependent kinase inhibitor 3
TRINITY_DN1629_c0_g2	1.978867148	1.80E-05	UP	1.956957688	2.15E-05	UP	-0.031252865	1	NC	HSFB4_ARATH	Heat stress transcription factor B-4
TRINITY_DN16831_c0_g1	1.26805529	0.00481442	UP	1.06738602	0.021413493	UP	-0.210186029	1	NC	R13L1_ARATH	Putative disease resistance RPP13-like protein 1
TRINITY_DN19388_c0_g1	1.31517193	0.005433705	NC	1.56358289	0.000640939	UP	0.238833137	1	NC
TRINITY_DN12378_c0_g1	-1.355316375	0.002148836	DOWN	-0.856812032	0.07642123	NC	0.489516422	0.775534427	NC	ERECT_ARATH	LRR receptor-like serine/threonine-protein kinase ERECTA {ECO:0000303|PubMed:8624444}
TRINITY_DN7572_c1_g2	10.4164482	2.83E-27	UP	9.811923877	7.52E-23	NC	-0.648672201	0.470106469	NC	RLA1_CHLRE	60S acidic ribosomal protein P1
TRINITY_DN4019_c1_g1	-0.612016169	0.26779171	NC	-1.10758234	0.01691297	DOWN	-0.504974809	0.763144813	NC	PANB1_ARATH	3-methyl-2-oxobutanoate hydroxymethyltransferase 1, mitochondrial
TRINITY_DN8153_c0_g1	5.999798582	1.84E-22	UP	5.412405709	1.79E-18	NC	-0.599410929	0.563971965	NC	KRP7_ARATH	Cyclin-dependent kinase inhibitor 7
TRINITY_DN1820_c2_g1	3.959955696	1.10E-18	UP	4.216239034	8.45E-21	UP	0.246645127	1	NC	PIP25_ARATH	Probable aquaporin PIP2-5
TRINITY_DN142310_c0_g1	-0.565756369	0.303677765	NC	-1.206289435	0.006586507	DOWN	-0.647423238	0.442833158	NC
TRINITY_DN4936_c0_g1	1.406786502	0.001268616	UP	1.324082451	0.002571583	UP	-0.092221085	1	NC	WRK65_ARATH	Probable WRKY transcription factor 65
TRINITY_DN7590_c0_g1	1.504985313	0.00137373	UP	0.494648908	0.463415892	NC	-1.019885215	0.069153585	NC
TRINITY_DN19083_c2_g1	10.77409689	5.44E-30	UP	0	1	NC	-11.1927563	8.63E-38	DOWN	RL29_YEAST	60S ribosomal protein L29
TRINITY_DN12007_c0_g1	-1.017668257	0.034969691	DOWN	-1.138969261	0.014672547	DOWN	-0.130943502	1	NC
TRINITY_DN9798_c1_g1	9.921906587	1.63E-23	NC	10.34716913	4.39E-26	UP	0.381139592	1	NC	H3_VOLCA	Histone H3
TRINITY_DN7495_c0_g1	0.948694983	0.063554535	NC	1.534629812	0.000788598	UP	0.576605484	0.606964622	NC	PER52_ARATH	Peroxidase 52
TRINITY_DN9710_c0_g1	8.015681507	1.03E-11	NC	10.85187597	4.93E-30	UP	2.793095852	5.32E-10	UP	VATL_DICDI	V-type proton ATPase proteolipid subunit
TRINITY_DN27109_c0_g1	1.104897085	0.014967456	UP	0.83721209	0.084135771	NC	-0.277532269	1	NC	PPL1_ARATH	PsbP-like protein 1, chloroplastic
TRINITY_DN7160_c0_g1	2.943664381	9.64E-12	UP	3.639317407	9.07E-17	UP	0.686107358	0.371111049	NC	XTH9_ARATH	Xyloglucan endotransglucosylase/hydrolase protein 9
TRINITY_DN4589_c1_g1	0.038824476	0.969499342	NC	-1.352946701	0.00273878	DOWN	-1.401220053	0.003525366	DOWN
TRINITY_DN1551_c0_g2	-0.594458967	0.271925836	NC	-1.014051803	0.027012555	DOWN	-0.429108389	0.892575677	NC	SIR_SOYBN	Sulfite reductase [ferredoxin], chloroplastic
TRINITY_DN8730_c0_g1	-1.983306801	2.73E-06	DOWN	-1.716108252	5.47E-05	DOWN	0.257940816	1	NC	OGG1_ARATH	N-glycosylase/DNA lyase OGG1
TRINITY_DN12347_c0_g1	-3.418582525	5.10E-10	NC	1.676413629	0.000353794	UP	5.094128138	2.18E-22	UP
TRINITY_DN2938_c0_g1	2.661501855	5.85E-09	UP	1.396923511	0.004339575	NC	-1.274529238	0.01107411	DOWN
TRINITY_DN5922_c0_g1	-10.29774745	2.21E-29	NC	0.165945571	0.843323116	NC	10.8723539	2.94E-35	UP
TRINITY_DN1264_c0_g1	-2.077231974	8.14E-07	DOWN	-1.823177994	1.61E-05	DOWN	0.244617706	1	NC	PP1RA_XENLA	Serine/threonine-protein phosphatase 1 regulatory subunit 10
TRINITY_DN7788_c0_g1	2.475814697	3.31E-08	UP	3.054982779	7.70E-12	UP	0.569276457	0.606964622	NC
TRINITY_DN1874_c0_g1	-0.457913431	0.446533682	NC	0.632682077	0.238456583	NC	1.081067148	0.037986291	UP
TRINITY_DN67365_c0_g1	-0.866137075	0.07166729	NC	-2.098312051	6.38E-07	DOWN	-1.239599565	0.01142555	DOWN
TRINITY_DN16576_c0_g1	9.166841874	4.82E-18	NC	10.57113045	8.16E-28	UP	1.361303061	0.005533753	UP	AKIR1_MOUSE	Akirin-1
TRINITY_DN10167_c0_g2	3.079773636	9.31E-11	UP	3.52719845	1.09E-13	UP	0.437313211	0.890798075	NC	AL3F1_ARATH	Aldehyde dehydrogenase family 3 member F1
TRINITY_DN3076_c0_g1	5.468923124	1.61E-16	NC	6.388313435	3.07E-23	UP	0.908205766	0.13030604	NC	BAG3_ARATH	BAG family molecular chaperone regulator 3
TRINITY_DN73_c0_g1	0.900807603	0.059305365	NC	1.020444475	0.026539489	UP	0.109698379	1	NC
TRINITY_DN6222_c0_g1	1.135629486	0.014715422	UP	1.264680378	0.005515492	UP	0.119704771	1	NC	UGPI4_ARATH	Uncharacterized GPI-anchored protein At3g06035
TRINITY_DN7373_c0_g1	-1.057113119	0.02058593	DOWN	-0.688730415	0.179973219	NC	0.359021539	1	NC	AKR2_ORYSJ	Probable aldo-keto reductase 2
TRINITY_DN25950_c0_g1	-2.135748183	1.73E-06	DOWN	-1.429257695	0.001601739	DOWN	0.696513402	0.430987313	NC
TRINITY_DN6660_c0_g4	-1.163211827	0.010784581	DOWN	-1.245045363	0.00554177	DOWN	-0.091305395	1	NC	YNS5_SCHPO	Uncharacterized WD repeat-containing protein C18H10.05
TRINITY_DN5195_c0_g1	9.027845476	4.35E-17	NC	11.12606579	2.90E-32	UP	2.055077166	4.45E-06	UP	HBX10_DICDI	Homeobox protein 10
TRINITY_DN10183_c0_g1	0.659423786	0.223301846	NC	1.471096629	0.000846885	UP	0.801488429	0.218138879	NC	Y4885_ARATH	Probable LRR receptor-like serine/threonine-protein kinase At4g08850
TRINITY_DN4562_c0_g2	2.967318925	1.52E-11	UP	1.855738383	2.97E-05	UP	-1.121217579	0.028831183	DOWN	Y1571_ARATH	Probable leucine-rich repeat receptor-like protein kinase At1g35710
TRINITY_DN8668_c0_g1	0.908511256	0.056409325	NC	1.657197349	0.00010186	UP	0.739237331	0.288467785	NC	PQSH_PSEAE	2-heptyl-3-hydroxy-4(1H)-quinolone synthase
TRINITY_DN58885_c0_g1	-2.718272098	5.80E-10	DOWN	-3.393990142	2.32E-14	DOWN	-0.68477952	0.472889515	NC
TRINITY_DN7794_c0_g1	0	1	NC	10.88525675	2.60E-30	UP	6.84700175	2.68E-31	UP
TRINITY_DN15898_c0_g1	1.939358572	5.95E-06	UP	1.700876643	8.19E-05	UP	-0.248059132	1	NC
TRINITY_DN2686_c1_g2	0.745856001	0.148415577	NC	1.4476675	0.001026871	UP	0.69290441	0.369030595	NC
TRINITY_DN878_c0_g2	3.850259907	3.09E-15	UP	4.064406429	8.84E-17	UP	0.204141269	1	NC
TRINITY_DN2153_c0_g4	1.576145799	0.000500762	UP	2.07689295	2.26E-06	UP	0.491101837	0.775534427	NC
TRINITY_DN3798_c0_g2	-1.95294875	5.31E-06	DOWN	-2.070356226	1.23E-06	DOWN	-0.126900488	1	NC	MAKR2_ARATH	Probable membrane-associated kinase regulator 2
TRINITY_DN956_c7_g1	0.353642474	0.554660648	NC	2.836632921	3.45E-11	UP	2.472978683	1.48E-08	UP
TRINITY_DN147_c5_g1	3.754500247	1.56E-12	NC	4.53507794	4.54E-18	UP	0.770456926	0.268415093	NC	PTL_ARATH	Trihelix transcription factor PTL
TRINITY_DN6856_c0_g4	0	1	NC	11.19116672	8.44E-33	UP	7.367235761	2.10E-34	UP	DHE4_BOTFU	NADP-specific glutamate dehydrogenase
TRINITY_DN1134_c0_g1	1.913710487	1.86E-05	UP	1.793702083	6.38E-05	UP	-0.129551707	1	NC	LAX2_ORYSJ	Auxin transporter-like protein 2
TRINITY_DN21613_c0_g1	9.89362719	2.60E-23	NC	10.87336005	3.21E-30	UP	0.935026179	0.110937804	NC	RL3_NEUCR	60S ribosomal protein L3
TRINITY_DN4646_c0_g1	1.323853995	0.002651335	UP	1.0072228	0.029614076	UP	-0.325916151	1	NC	C81E9_MEDTR	Isoflavone 3'-hydroxylase {ECO:0000303|PubMed:14617078}
TRINITY_DN7293_c0_g1	-3.874340411	3.09E-16	DOWN	-2.815453808	2.84E-10	DOWN	1.051406327	0.129385792	NC	WIT1_ARATH	WPP domain-interacting tail-anchored protein 1
TRINITY_DN1032_c2_g2	1.02850334	0.025091814	UP	0.653754623	0.211992853	NC	-0.384213233	0.97802035	NC	ATB16_ARATH	Homeobox-leucine zipper protein ATHB-16
TRINITY_DN6499_c2_g1	-0.803032562	0.105549753	NC	0.616564382	0.254993261	NC	1.411625579	0.002576946	UP
TRINITY_DN2856_c0_g1	1.973620262	4.00E-06	UP	1.981520887	3.50E-06	UP	-0.001577726	1	NC
TRINITY_DN109499_c0_g1	10.53656947	3.52E-28	UP	0	1	NC	-10.95518747	7.02E-36	DOWN	Y2218_PSEAE	Uncharacterized protein PA2218
TRINITY_DN8725_c0_g1	9.420541036	7.59E-20	NC	12.78311713	7.76E-46	UP	3.318785924	3.75E-14	UP	ADT_NEUCR	ADP,ATP carrier protein
TRINITY_DN902_c0_g5	-2.134775202	3.78E-07	DOWN	-2.00610194	1.80E-06	DOWN	0.119392296	1	NC	GH31_ARATH	Probable indole-3-acetic acid-amido synthetase GH3.1
TRINITY_DN2143_c2_g1	-1.53777823	0.000503198	DOWN	-1.194529113	0.008742805	DOWN	0.333707492	1	NC
TRINITY_DN5271_c0_g1	1.772300981	4.15E-05	UP	1.89105119	1.09E-05	UP	0.109188101	1	NC	IDD3_ARATH	Zinc finger protein MAGPIE {ECO:0000303|PubMed:17785527}
TRINITY_DN10314_c0_g1	2.173546145	1.10E-06	NC	3.40962174	2.65E-14	UP	1.225814838	0.014647809	UP
TRINITY_DN8801_c0_g2	-0.575702977	0.313560424	NC	0.502097037	0.396981241	NC	1.068586864	0.045091702	UP	LAL5_ARATH	MATE efflux family protein LAL5
TRINITY_DN32687_c0_g2	0	1	NC	10.13009761	2.89E-25	UP	5.914055107	1.31E-24	UP	YI06_SCHPO	Uncharacterized hemerythrin-like protein C869.06c
TRINITY_DN3004_c0_g1	1.192969948	0.011921126	UP	0.705123364	0.203019825	NC	-0.497676269	0.771461329	NC	WRK13_ARATH	Probable WRKY transcription factor 13
TRINITY_DN9301_c0_g2	8.496506322	1.47E-14	NC	10.28304986	1.32E-25	UP	1.743923899	0.000186026	UP	EF3_SCHPO	Elongation factor 3
TRINITY_DN23891_c0_g1	1.080513924	0.01993256	UP	1.093077659	0.017575741	UP	0.003230742	1	NC	VIPI_SCHPO	Protein vip1
TRINITY_DN630_c2_g1	1.497285167	0.000484655	UP	1.245671731	0.004539733	UP	-0.260522721	1	NC	TSJT1_TOBAC	Stem-specific protein TSJT1
TRINITY_DN31178_c0_g1	4.267836365	2.50E-20	UP	4.498494597	2.55E-22	UP	0.221322674	1	NC
TRINITY_DN3395_c0_g1	1.607827267	0.000183239	UP	1.311588902	0.002873849	UP	-0.305769689	1	NC	PTR6_ARATH	Protein NRT1/ PTR FAMILY 1.2
TRINITY_DN4985_c0_g1	7.59847505	2.66E-33	UP	8.596655504	1.49E-41	UP	0.986077718	0.071532103	NC	RS25_SPOFR	40S ribosomal protein S25
TRINITY_DN6418_c0_g1	1.434401846	0.001221036	UP	1.003634562	0.034216679	UP	-0.44042488	0.874015805	NC
TRINITY_DN603_c2_g1	-1.171359738	0.011459378	DOWN	-1.105877323	0.017709231	DOWN	0.056957838	1	NC
TRINITY_DN63364_c0_g1	0	1	NC	10.29467532	1.10E-25	UP	3.225685616	4.38E-12	UP
TRINITY_DN3573_c0_g1	6.243478986	9.93E-28	UP	6.719875157	1.34E-31	UP	0.465381792	0.825529449	NC	WSD1_ARATH	O-acyltransferase WSD1
TRINITY_DN1384_c1_g4	1.143117477	0.014350877	UP	-0.070896318	0.93860124	NC	-1.224073733	0.014742931	DOWN
TRINITY_DN9213_c0_g1	-3.834235174	3.98E-17	DOWN	-11.65834933	7.77E-41	DOWN	-8.206399635	2.57E-15	NC
TRINITY_DN3590_c0_g2	0.731963407	0.175485361	NC	1.117717374	0.018410799	UP	0.37640005	1	NC	RLCK7_ARATH	Probable serine/threonine-protein kinase RLCKVII
TRINITY_DN3958_c0_g1	-1.157222474	0.009719825	DOWN	-0.920915222	0.049615392	NC	0.226880351	1	NC	COBRA_ARATH	Protein COBRA
TRINITY_DN6198_c0_g2	8.762823808	2.89E-16	NC	12.78379265	7.75E-46	UP	3.977660647	7.91E-19	UP	RS26_SCHCO	40S ribosomal protein S26
TRINITY_DN4783_c0_g1	-0.252185225	0.725288147	NC	-1.305791124	0.002964478	DOWN	-1.063223222	0.042109942	DOWN
TRINITY_DN42351_c0_g1	1.534471726	0.000782408	UP	1.70829341	0.000145564	UP	0.164192439	1	NC	GATA8_ARATH	GATA transcription factor 8
TRINITY_DN10738_c0_g2	-2.595786295	7.20E-10	DOWN	-2.06349121	8.97E-07	DOWN	0.521879024	0.700812042	NC	Y381_RICFE	Putative ankyrin repeat protein RF_0381
TRINITY_DN6399_c0_g1	2.032317516	8.09E-06	UP	2.158384244	1.93E-06	UP	0.116629106	1	NC
TRINITY_DN12858_c0_g1	2.569103462	2.19E-08	UP	2.005979044	1.80E-05	UP	-0.573421619	0.607492255	NC
TRINITY_DN11608_c1_g1	-1.609335051	0.000178951	DOWN	-1.24172768	0.005053881	DOWN	0.358208294	1	NC	EDR2L_ARATH	Protein ENHANCED DISEASE RESISTANCE 2-like
TRINITY_DN2616_c1_g1	1.606563649	0.000213816	UP	0.645260159	0.226953732	NC	-0.971098217	0.079247446	NC	RFS_PEA	Galactinol--sucrose galactosyltransferase
TRINITY_DN5950_c0_g1	11.10581708	9.34E-32	UP	0	1	NC	-11.52439528	1.77E-40	DOWN
TRINITY_DN12677_c0_g1	-5.363720981	8.17E-30	DOWN	-5.0104805	2.17E-27	DOWN	0.34443639	1	NC	AI5L1_ARATH	ABSCISIC ACID-INSENSITIVE 5-like protein 1
TRINITY_DN3107_c1_g3	1.424857583	0.009832858	NC	3.311354577	1.82E-11	UP	1.879474016	5.24E-05	UP
TRINITY_DN3581_c0_g2	-1.7586622	4.13E-05	DOWN	-1.621273588	0.000165769	DOWN	0.128005164	1	NC	HFB2B_ARATH	Heat stress transcription factor B-2b
TRINITY_DN45776_c0_g1	10.68105847	2.63E-29	UP	0	1	NC	-11.0996608	5.02E-37	DOWN
TRINITY_DN68617_c0_g1	1.868768656	1.32E-05	UP	1.734861138	5.54E-05	UP	-0.143301141	1	NC	HYES_PIG	Bifunctional epoxide hydrolase 2
TRINITY_DN2412_c0_g2	1.254664287	0.005788601	UP	1.392648369	0.00175055	UP	0.128275129	1	NC	IPYR_SOLTU	Soluble inorganic pyrophosphatase
TRINITY_DN6952_c0_g1	-2.90144852	2.01E-10	DOWN	-3.901334095	5.64E-16	DOWN	-1.011002357	0.195873288	NC	M820_ARATH	Uncharacterized mitochondrial protein AtMg00820
TRINITY_DN1135_c0_g1	-1.641717594	0.000125827	DOWN	-2.281431857	6.47E-08	DOWN	-0.649234358	0.447201063	NC	ERL2_ARATH	LRR receptor-like serine/threonine-protein kinase ERL2
TRINITY_DN8517_c0_g1	7.401219357	1.49E-08	NC	12.14892494	1.08E-40	UP	4.705412255	1.75E-23	UP	RL38_BRABE	60S ribosomal protein L38
TRINITY_DN6021_c0_g2	1.163813887	0.010663607	UP	1.770095605	3.75E-05	UP	0.597004454	0.540355797	NC	RMA1_CAPAN	E3 ubiquitin-protein ligase RMA1H1
TRINITY_DN197_c0_g7	1.642873089	0.000171182	UP	1.582820835	0.000301875	UP	-0.069544531	1	NC	NAMB2_TRITD	NAC transcription factor NAM-B2
TRINITY_DN6368_c0_g1	1.444523294	0.001515599	UP	0.793949397	0.131791415	NC	-0.65945856	0.43820071	NC	DNJ36_ARATH	DnaJ protein P58IPK homolog
TRINITY_DN3357_c0_g2	1.270547019	0.016321576	NC	2.232364112	2.39E-06	UP	0.952408592	0.106311855	NC
TRINITY_DN6592_c0_g1	1.421503681	0.001684022	UP	1.591129001	0.000333912	UP	0.160197698	1	NC	SKU5_ARATH	Monocopper oxidase-like protein SKU5
TRINITY_DN1582_c0_g2	-1.657365847	0.000101286	DOWN	-1.838480929	1.35E-05	DOWN	-0.190774414	1	NC	AMY3_ARATH	Alpha-amylase 3, chloroplastic
TRINITY_DN12933_c0_g1	-3.900279083	3.26E-19	DOWN	-3.742627615	4.08E-18	DOWN	0.14872973	1	NC
TRINITY_DN2357_c0_g1	1.901838565	1.18E-05	UP	0.988163268	0.040416662	NC	-0.923400545	0.10832135	NC
TRINITY_DN6358_c0_g1	2.420914673	1.45E-08	UP	2.012599633	2.61E-06	UP	-0.417734308	0.916729816	NC	PDS_ONCHC	15-cis-phytoene desaturase, chloroplastic/chromoplastic
TRINITY_DN19153_c0_g2	0	1	NC	10.5308634	1.67E-27	UP	10.90558524	1.64E-35	UP	RL9B_YEAST	60S ribosomal protein L9-B
TRINITY_DN11684_c0_g1	-1.152184267	0.009869238	DOWN	-1.461965123	0.000662143	DOWN	-0.319262207	1	NC	PDR1_TOBAC	Pleiotropic drug resistance protein 1
TRINITY_DN14167_c0_g2	-0.417903268	0.499224731	NC	-2.69807573	2.71E-10	DOWN	-2.291144641	1.62E-07	DOWN
TRINITY_DN7584_c1_g1	1.52235625	0.000961495	UP	1.300431003	0.006034969	UP	-0.231472011	1	NC	NEP2_NEPGR	Aspartic proteinase nepenthesin-2
TRINITY_DN1608_c0_g1	-0.606662611	0.263673793	NC	-1.031180355	0.025262248	DOWN	-0.433903384	0.890218211	NC
TRINITY_DN2333_c1_g1	-3.901726057	1.12E-17	DOWN	-4.730925653	2.92E-23	DOWN	-0.839787487	0.331451692	NC
TRINITY_DN2127_c2_g1	-0.859656904	0.074364324	NC	-1.291071828	0.003269663	DOWN	-0.440907596	0.867178272	NC	JP630_ARATH	Probable polygalacturonase non-catalytic subunit JP630
TRINITY_DN20887_c0_g1	9.690926998	7.54E-22	UP	0	1	NC	-10.10932013	3.75E-29	DOWN
TRINITY_DN15333_c1_g1	-1.805422822	2.37E-05	DOWN	-0.013918289	0.989352583	NC	1.782599086	5.93E-05	UP
TRINITY_DN5006_c0_g1	10.4489874	1.58E-27	UP	12.28156489	9.17E-42	UP	1.788860511	6.12E-05	UP	RL15A_PICMA	60S ribosomal protein L15-1
TRINITY_DN123395_c0_g1	0	1	NC	11.31571262	8.20E-34	UP	5.494663572	2.56E-27	UP	Y2309_ARATH	Uncharacterized protein At2g23090
TRINITY_DN13421_c0_g1	-1.143471983	0.012782821	DOWN	-2.245513016	1.98E-07	DOWN	-1.11128829	0.037929927	DOWN
TRINITY_DN7923_c1_g2	-8.898799764	2.24E-49	DOWN	-7.480808812	4.22E-43	DOWN	0	1	NC	GOLS1_ARATH	Galactinol synthase 1
TRINITY_DN2799_c0_g1	-0.780522158	0.12038819	NC	-1.160508982	0.010471868	DOWN	-0.390029127	0.976174089	NC
TRINITY_DN7128_c0_g1	1.640921233	0.000775146	NC	3.041096251	3.94E-11	UP	1.391572067	0.003962336	UP
TRINITY_DN12433_c0_g1	11.10248	9.65E-32	UP	0	1	NC	-9.184072591	4.59E-39	DOWN
TRINITY_DN3115_c2_g1	0.237581313	0.746315376	NC	1.060459185	0.019691308	UP	0.81332163	0.195880368	NC	CER26_ARATH	Protein ECERIFERUM 26
TRINITY_DN12259_c0_g1	10.78196208	4.79E-30	UP	9.282341612	5.27E-19	NC	-1.544930558	0.000987472	DOWN
TRINITY_DN11229_c0_g1	1.410512468	0.005884703	UP	-1.118218408	0.027927924	NC	-2.540906709	2.58E-08	DOWN
TRINITY_DN4788_c0_g1	1.994238158	5.73E-06	UP	1.812115415	4.35E-05	UP	-0.191735958	1	NC
TRINITY_DN1182_c0_g1	-1.758789939	3.15E-05	DOWN	-2.662179504	2.17E-10	DOWN	-0.912934396	0.10879506	NC	AATC_ORYSJ	Aspartate aminotransferase, cytoplasmic
TRINITY_DN16033_c0_g1	-1.544950425	0.000310888	DOWN	-2.783162592	3.80E-11	DOWN	-1.247764189	0.01022245	DOWN
TRINITY_DN3464_c0_g3	2.59695658	1.38E-08	UP	2.734548637	1.87E-09	UP	0.127630068	1	NC	COL5_ARATH	Zinc finger protein CONSTANS-LIKE 5
TRINITY_DN28933_c0_g1	8.367472713	9.87E-14	NC	10.59224939	5.72E-28	UP	2.181669948	1.44E-06	UP	SMT1_DICDI	Probable cycloartenol-C-24-methyltransferase 1
TRINITY_DN59_c1_g2	-0.920260825	0.057483796	NC	-1.575736722	0.000345509	DOWN	-0.665333901	0.444771704	NC
TRINITY_DN11313_c0_g2	10.52237856	4.54E-28	UP	0	1	NC	-10.94104936	8.96E-36	DOWN	SR4_PHYPO	Spherulin-4
TRINITY_DN23957_c0_g1	2.96769836	2.44E-09	NC	3.433507651	2.47E-12	UP	0.45572469	0.860267107	NC	HPSE3_ARATH	Heparanase-like protein 3
TRINITY_DN4839_c1_g1	1.543504119	0.000308301	UP	1.170433034	0.008337338	UP	-0.382618347	0.978663108	NC	ERD14_ARATH	Dehydrin ERD14
TRINITY_DN3553_c0_g1	-0.571528823	0.296147455	NC	0.889201129	0.059746613	NC	1.451403319	0.001629675	UP	R18AL_ARATH	60S ribosomal protein L18a-like protein
TRINITY_DN14738_c0_g1	-0.308151816	0.703269247	NC	-2.171171495	1.63E-06	DOWN	-1.875928767	6.36E-05	NC
TRINITY_DN13705_c0_g1	-1.343459805	0.002615703	DOWN	-1.761058513	4.95E-05	DOWN	-0.426694952	0.929116149	NC	RNHX1_ARATH	Putative ribonuclease H protein At1g65750
TRINITY_DN4211_c0_g1	-0.758293635	0.187569726	NC	3.099905278	3.38E-12	UP	3.84957237	1.86E-17	UP	STR14_ARATH	Rhodanese-like domain-containing protein 14, chloroplastic
TRINITY_DN8314_c0_g1	1.042651537	0.040663776	NC	1.61893104	0.000441908	UP	0.56683807	0.630341782	NC	Y5343_ARATH	Probable LRR receptor-like serine/threonine-protein kinase At1g53430
TRINITY_DN16019_c0_g1	2.071637572	9.65E-07	UP	1.906861296	6.76E-06	UP	-0.174271066	1	NC
TRINITY_DN115_c1_g1	-2.698607967	1.43E-10	DOWN	-2.66218922	2.23E-10	DOWN	0.02695494	1	NC	BXL7_ARATH	Probable beta-D-xylosidase 7
TRINITY_DN9610_c0_g1	-1.395979772	0.001686296	DOWN	-1.245199314	0.00570716	DOWN	0.141580246	1	NC	MAKR1_ARATH	Probable membrane-associated kinase regulator 1
TRINITY_DN7471_c0_g2	0.894163263	0.083315706	NC	1.068039902	0.028922945	UP	0.164317781	1	NC
TRINITY_DN3053_c0_g2	1.620382797	0.000209557	UP	2.094063978	9.65E-07	UP	0.464319008	0.821671699	NC
TRINITY_DN7613_c0_g1	-1.905701907	1.29E-05	DOWN	-3.863493707	7.05E-17	DOWN	-1.968255505	5.70E-05	NC
TRINITY_DN18226_c0_g1	0.922556246	0.049459649	NC	-0.130460032	0.872177969	NC	-1.062521134	0.040447636	DOWN
TRINITY_DN7041_c0_g1	3.198169594	5.05E-12	UP	3.602501204	6.60E-15	UP	0.394376151	0.968313144	NC
TRINITY_DN4091_c0_g1	-2.340733235	2.37E-08	DOWN	-2.246893629	7.96E-08	DOWN	0.084001662	1	NC	HS174_ARATH	17.4 kDa class III heat shock protein
TRINITY_DN8179_c0_g1	-1.519863439	0.000390373	DOWN	-1.175695607	0.007979667	DOWN	0.334812709	1	NC	TRXH_RICCO	Thioredoxin H-type
TRINITY_DN8933_c0_g1	2.384098141	2.15E-08	UP	1.721546865	6.56E-05	UP	-0.671968471	0.396668711	NC	ERF08_ARATH	Ethylene-responsive transcription factor ERF008
TRINITY_DN5725_c0_g3	-1.353803103	0.001832432	DOWN	-1.654439509	9.49E-05	DOWN	-0.310053825	1	NC	AAP3_ARATH	Amino acid permease 3
TRINITY_DN15239_c0_g1	0	1	NC	5.985676761	5.88E-26	UP	3.457019771	7.37E-14	UP
TRINITY_DN13832_c0_g3	0	1	NC	10.67889636	1.15E-28	UP	3.537397303	3.12E-14	UP
TRINITY_DN4447_c0_g2	0.644542854	0.271881633	NC	1.036174339	0.03681918	UP	0.382265086	1	NC
TRINITY_DN1769_c0_g1	-3.175778348	1.78E-13	DOWN	-0.587260172	0.27916823	NC	2.579309214	2.80E-09	UP
TRINITY_DN6658_c1_g2	0.178436062	0.823072536	NC	-1.349699462	0.002571583	DOWN	-1.537961985	0.000935523	DOWN
TRINITY_DN2592_c0_g2	-1.121002454	0.012484337	DOWN	-0.180633219	0.817543043	NC	0.931206554	0.097316221	NC	HSP70_LUPPO	Heat shock 70 kDa protein
TRINITY_DN588_c6_g1	1.36617712	0.003212956	UP	1.773935982	6.90E-05	UP	0.398049674	0.965521222	NC	RFA2A_ARATH	Replication protein A 32 kDa subunit A
TRINITY_DN2530_c1_g1	-1.536074018	0.00053968	DOWN	-2.983288444	2.07E-11	DOWN	-1.455041177	0.004036827	NC
TRINITY_DN10047_c0_g1	0	1	NC	10.43636928	9.20E-27	UP	6.729274022	6.00E-29	UP	ADH1_ASPFN	Alcohol dehydrogenase 1
TRINITY_DN2676_c1_g4	1.79937715	2.33E-05	UP	2.107083426	5.65E-07	UP	0.298094995	1	NC	MYB4_ARATH	Transcription repressor MYB4
TRINITY_DN1683_c1_g1	-0.233881435	0.755320851	NC	-1.377168576	0.002019691	DOWN	-1.152765434	0.024691092	DOWN
TRINITY_DN5185_c0_g3	-1.444291242	0.000944383	DOWN	-0.937479326	0.046738335	NC	0.497637349	0.7592103	NC
TRINITY_DN2435_c2_g1	-2.549748692	9.20E-09	DOWN	-1.321712056	0.003705479	DOWN	1.220470342	0.021159016	NC
TRINITY_DN138870_c0_g1	5.18979912	7.96E-20	UP	5.413675255	6.28E-22	UP	0.213589892	1	NC	Y4744_ARATH	Uncharacterized protein At4g06744
TRINITY_DN13999_c0_g1	-0.011913373	0.991924986	NC	-1.048492604	0.024020589	DOWN	-1.045995028	0.050630585	NC
TRINITY_DN7021_c0_g1	-1.06323054	0.025260186	DOWN	-0.276918947	0.712002316	NC	0.777100244	0.265936848	NC
TRINITY_DN6994_c0_g1	4.31798746	4.21E-14	NC	7.037813422	5.93E-35	UP	2.709957556	4.31E-10	UP	RS22_NEUCR	40S ribosomal protein S22
TRINITY_DN7556_c0_g1	1.673804706	8.79E-05	UP	1.61562722	0.000155507	UP	-0.067347929	1	NC	ASPGB_ARATH	Probable isoaspartyl peptidase/L-asparaginase 2
TRINITY_DN19423_c0_g1	0	1	NC	10.12777511	2.89E-25	UP	3.576626256	9.32E-14	UP	ATP7_NEUCR	ATP synthase subunit d, mitochondrial
TRINITY_DN5_c0_g1	-0.293065916	0.667431951	NC	-2.980231749	1.60E-12	DOWN	-2.696757934	2.86E-10	DOWN	ADH_MALDO	Alcohol dehydrogenase
TRINITY_DN5590_c0_g2	-1.258552598	0.006627481	DOWN	-0.59931974	0.286456869	NC	0.648441776	0.478179032	NC	RGA3_SOLBU	Putative disease resistance protein RGA3
TRINITY_DN21335_c2_g2	4.64568252	1.64E-19	UP	3.341043418	1.58E-10	NC	-1.314613129	0.007176047	DOWN	YUC6_ARATH	Indole-3-pyruvate monooxygenase YUCCA6
TRINITY_DN4947_c0_g1	-1.930155016	1.02E-05	DOWN	-2.239213695	2.91E-07	DOWN	-0.318615572	1	NC	PTR28_ARATH	Protein NRT1/ PTR FAMILY 5.6
TRINITY_DN300_c0_g1	0.714400349	0.165693145	NC	1.065294402	0.020029109	UP	0.341542313	1	NC	CINV2_ARATH	Alkaline/neutral invertase CINV2 {ECO:0000305}
TRINITY_DN20836_c0_g2	10.35129917	9.36E-27	UP	0	1	NC	-10.7699325	2.07E-34	DOWN	CPC1_NEUCR	Cross-pathway control protein 1
TRINITY_DN629_c0_g1	-1.59766119	0.000190363	DOWN	-1.610358011	0.000161571	DOWN	-0.022155457	1	NC	BLH9_ARATH	BEL1-like homeodomain protein 9
TRINITY_DN5768_c0_g3	7.318361969	3.26E-19	NC	9.840431005	1.09E-37	UP	2.504547809	1.06E-08	UP	HEM2_CANGA	Delta-aminolevulinic acid dehydratase
TRINITY_DN5855_c0_g1	1.322981779	0.003777425	UP	1.149929464	0.013832459	UP	-0.182605904	1	NC	XPT_ARATH	Xylulose 5-phosphate/phosphate translocator, chloroplastic
TRINITY_DN7361_c0_g1	2.984407631	1.72E-12	UP	-0.07232112	0.934348496	NC	-3.066453814	9.18E-13	DOWN	EXOL4_ARATH	Protein EXORDIUM-like 4
TRINITY_DN36056_c0_g1	8.16617421	1.65E-12	NC	10.49781945	3.09E-27	UP	2.289471351	4.58E-07	UP	VDAC_NEUCR	Mitochondrial outer membrane protein porin
TRINITY_DN9717_c0_g1	1.974759313	1.48E-05	UP	0.980494267	0.061324623	NC	-1.004504191	0.075825	NC	Y1571_ARATH	Probable leucine-rich repeat receptor-like protein kinase At1g35710
TRINITY_DN6113_c0_g1	12.38276614	3.25E-42	UP	0	1	NC	-12.80159678	4.47E-51	DOWN
TRINITY_DN27778_c0_g1	8.776866013	2.16E-16	NC	10.7431199	3.64E-29	UP	1.923007058	2.39E-05	UP	ACT10_SOLTU	Actin-85C
TRINITY_DN902_c1_g3	-2.394345494	2.47E-08	DOWN	-1.38498071	0.001663677	DOWN	1.000544853	0.074455234	NC
TRINITY_DN21293_c0_g1	-1.726700515	0.000140705	NC	-0.033828073	0.96771468	NC	1.684776655	0.000337001	UP
TRINITY_DN3327_c1_g2	0.714718737	0.161321083	NC	1.597214078	0.000186674	UP	0.87309045	0.139848148	NC	PPCT_MOUSE	Phosphatidylcholine transfer protein
TRINITY_DN8531_c0_g2	0.596430557	0.284699706	NC	1.083660933	0.01874717	UP	0.477754167	0.797994976	NC	AB36G_ARATH	ABC transporter G family member 36
TRINITY_DN5434_c0_g1	-1.654536097	0.000202195	DOWN	-1.908990067	1.60E-05	DOWN	-0.263759772	1	NC	XSP1_ARATH	Xylem serine proteinase 1
TRINITY_DN5052_c0_g1	4.508363191	2.15E-22	UP	4.362177257	2.22E-21	UP	-0.156372118	1	NC	TPS9_RICCO	Probable terpene synthase 9
TRINITY_DN1092_c0_g1	-2.044483728	2.33E-06	DOWN	-1.529718564	0.000497127	DOWN	0.505764451	0.771461329	NC
TRINITY_DN25376_c0_g1	0.974411752	0.035111677	NC	1.334157518	0.002128646	UP	0.350707242	1	NC
TRINITY_DN23700_c0_g1	-2.344491168	2.16E-08	DOWN	-2.604000498	5.11E-10	DOWN	-0.268597322	1	NC
TRINITY_DN39886_c0_g1	-0.687263336	0.193095612	NC	-11.45712378	3.81E-39	DOWN	-11.15373058	1.80E-37	DOWN
TRINITY_DN6962_c0_g1	-1.064164133	0.018825594	DOWN	-1.343267527	0.001956946	DOWN	-0.288649273	1	NC	GASA3_ARATH	Gibberellin-regulated protein 3
TRINITY_DN7471_c0_g1	1.178619151	0.010166298	UP	0.8991914	0.064501329	NC	-0.289103245	1	NC	SERIC_NEMVE	Probable serine incorporator
TRINITY_DN2686_c0_g2	1.936237811	7.03E-06	UP	-0.974695707	0.045771591	NC	-2.921437521	2.06E-11	DOWN
TRINITY_DN320_c0_g1	1.186185244	0.007665808	UP	1.932677168	4.27E-06	UP	0.737044964	0.289338503	NC	MCAT_ARATH	Mitochondrial carnitine/acylcarnitine carrier-like protein
TRINITY_DN15626_c0_g1	-2.894346853	3.81E-11	DOWN	-1.902671909	1.06E-05	DOWN	0.982605556	0.098523943	NC
TRINITY_DN9426_c1_g1	1.195471772	0.00759867	UP	1.229762901	0.005623236	UP	0.024897358	1	NC	PGLT1_BOVIN	Protein O-glucosyltransferase 1
TRINITY_DN904_c3_g1	1.096923394	0.015457607	UP	0.958904112	0.039454032	NC	-0.147351106	1	NC
TRINITY_DN772_c2_g1	1.215286969	0.00722188	UP	0.747383383	0.146709698	NC	-0.477697409	0.797994976	NC
TRINITY_DN4526_c0_g2	1.726555299	6.30E-05	UP	2.663360359	3.80E-10	UP	0.92727994	0.101775716	NC	C83B1_ARATH	Cytochrome P450 83B1
TRINITY_DN1559_c0_g3	-1.822600164	2.01E-05	DOWN	-1.814592456	2.11E-05	DOWN	-0.001570107	1	NC
TRINITY_DN3409_c0_g1	0.778334782	0.141863739	NC	1.257271415	0.006712384	UP	0.469545915	0.827922891	NC	CSLH1_ORYSJ	Cellulose synthase-like protein H1
TRINITY_DN6739_c0_g2	8.923419706	2.05E-16	NC	10.26221378	2.85E-26	UP	1.295393104	0.010340776	UP	ACAP3_HUMAN	Arf-GAP with coiled-coil, ANK repeat and PH domain-containing protein 3
TRINITY_DN30440_c0_g1	0	1	NC	9.82301003	1.70E-63	UP	9.384587968	5.19E-62	UP
TRINITY_DN19584_c0_g1	-2.382628569	1.83E-08	DOWN	-1.984228211	2.71E-06	DOWN	0.389233776	0.978381906	NC	U90A1_ARATH	UDP-glycosyltransferase 90A1
TRINITY_DN7852_c0_g1	0.824807412	0.109365578	NC	1.067540241	0.024969282	UP	0.233093255	1	NC	DCL4_ARATH	Dicer-like protein 4
TRINITY_DN2829_c0_g1	-2.997230462	7.08E-11	NC	0.155631755	0.854675536	NC	3.145585824	8.08E-12	UP
TRINITY_DN2946_c3_g1	-1.794315277	4.04E-05	DOWN	-1.565234663	0.00037	DOWN	0.21948672	1	NC
TRINITY_DN2479_c1_g2	1.675044321	0.000123449	UP	0.123312186	0.88784722	NC	-1.561469059	0.000669584	DOWN	SMD3_DROME	Small nuclear ribonucleoprotein Sm D3
TRINITY_DN3343_c0_g1	8.612668479	2.87E-15	NC	11.87317252	2.09E-38	UP	3.217661148	4.01E-13	UP	FKBP4_RHIO9	FK506-binding protein 4
TRINITY_DN291_c1_g1	1.319656819	0.002482758	UP	0.949972247	0.040660521	NC	-0.379259164	0.983692958	NC	UGE1_PEA	Bifunctional UDP-glucose 4-epimerase and UDP-xylose 4-epimerase 1
TRINITY_DN17402_c0_g2	0	1	NC	10.40138235	1.70E-26	UP	5.543604621	7.83E-24	UP
TRINITY_DN5429_c0_g1	1.456456594	0.002148836	NC	1.985677296	1.09E-05	UP	0.519947628	0.72556749	NC	OMD_HUMAN	Osteomodulin
TRINITY_DN389_c0_g2	-0.142749367	0.864152209	NC	-3.439531003	2.33E-14	DOWN	-3.307158918	2.56E-13	DOWN
TRINITY_DN12432_c0_g2	1.09483094	0.0157694	UP	0.923215754	0.049752186	NC	-0.181724903	1	NC
TRINITY_DN2114_c1_g1	-3.085852026	9.60E-13	DOWN	-3.070197027	1.03E-12	DOWN	0.00616233	1	NC	TIC32_PEA	Short-chain dehydrogenase TIC 32, chloroplastic
TRINITY_DN14938_c0_g1	4.135078191	9.70E-17	UP	3.87443348	5.61E-15	UP	-0.270928862	1	NC
TRINITY_DN954_c1_g1	1.712359201	7.63E-05	UP	2.152895007	4.41E-07	UP	0.430842284	0.890798075	NC	CRK25_ARATH	Cysteine-rich receptor-like protein kinase 25
TRINITY_DN6907_c0_g2	2.332201816	4.43E-08	UP	2.630302726	6.39E-10	UP	0.289122848	1	NC	KAI2_ARATH	Probable esterase KAI2
TRINITY_DN2328_c3_g1	1.824112011	4.69E-05	UP	1.285688854	0.00607808	NC	-0.548935676	0.65902582	NC
TRINITY_DN8536_c2_g1	-0.361531647	0.630326016	NC	0.968295559	0.049092128	NC	1.319769375	0.00803517	UP	Y4885_ARATH	Probable LRR receptor-like serine/threonine-protein kinase At4g08850
TRINITY_DN4584_c0_g2	3.165329788	6.25E-12	UP	1.373126151	0.006144853	NC	-1.802351887	7.11E-05	DOWN	Y1571_ARATH	Probable leucine-rich repeat receptor-like protein kinase At1g35710
TRINITY_DN130867_c0_g1	-1.138669733	0.013080015	DOWN	-1.126712145	0.01395091	DOWN	0.002638954	1	NC	SD22_ARATH	G-type lectin S-receptor-like serine/threonine-protein kinase SD2-2
TRINITY_DN11464_c0_g1	-1.837362411	1.30E-05	DOWN	-1.927053362	4.39E-06	DOWN	-0.099292041	1	NC
TRINITY_DN11387_c0_g2	1.220194106	0.008606699	UP	-0.765167079	0.182550747	NC	-1.997489244	1.26E-05	DOWN
TRINITY_DN2619_c1_g1	-1.262952217	0.004015934	DOWN	-0.8999424	0.055472201	NC	0.353549623	1	NC	USPAL_ARATH	Universal stress protein A-like protein
TRINITY_DN2737_c0_g1	1.098264112	0.015469758	UP	1.429058944	0.000966229	UP	0.321586087	1	NC	ML3_VISAL	Beta-galactoside-specific lectin 3
TRINITY_DN8470_c0_g1	7.606684728	1.49E-09	NC	12.09204949	3.25E-40	UP	4.443207355	1.08E-21	UP	RS13_SOYBN	40S ribosomal protein S13
TRINITY_DN7_c0_g2	0.91055052	0.053863772	NC	1.006244325	0.028105539	UP	0.086202157	1	NC	AGO1_ARATH	Protein argonaute 1
TRINITY_DN887_c3_g2	-2.236492397	2.73E-07	DOWN	-0.865748119	0.077096712	NC	1.360803857	0.005694503	UP
TRINITY_DN80080_c0_g1	1.970858814	1.51E-05	NC	2.757436699	9.24E-10	UP	0.777943433	0.266987607	NC
TRINITY_DN6835_c0_g1	7.759123008	2.80E-10	NC	11.9129029	9.89E-39	UP	4.111842173	3.24E-19	UP	RL221_DICDI	60S ribosomal protein L22 1
TRINITY_DN6288_c0_g1	1.582873801	0.0003393	UP	1.669664484	0.00014022	UP	0.077303861	1	NC	ACL5_ARATH	Thermospermine synthase ACAULIS5
TRINITY_DN176_c2_g1	1.441217253	0.000870367	UP	-0.629528464	0.236458299	NC	-2.08004337	1.61E-06	DOWN	LYK3_ARATH	LysM domain receptor-like kinase 3
TRINITY_DN8475_c0_g1	-1.207733723	0.008538206	DOWN	-1.84343	2.61E-05	DOWN	-0.645509337	0.499251036	NC	SKI23_ARATH	F-box protein SKIP23
TRINITY_DN19119_c0_g3	-1.082130367	0.01993256	DOWN	-1.274623368	0.004714561	DOWN	-0.201947054	1	NC	IBH1_ORYSI	Transcription factor IBH1
TRINITY_DN23199_c3_g1	-1.816637983	1.70E-05	DOWN	-1.742446384	3.78E-05	DOWN	0.065442163	1	NC
TRINITY_DN6240_c0_g1	1.261312173	0.005102184	UP	1.049735902	0.024185757	UP	-0.221422085	1	NC
TRINITY_DN6148_c0_g1	8.329074299	1.70E-13	NC	11.25156976	2.70E-33	UP	2.879278508	1.01E-10	UP	PITP3_DICDI	Phosphatidylinositol transfer protein 3
TRINITY_DN3822_c0_g4	-10.86733452	6.86E-34	DOWN	0.641916503	0.229096206	NC	11.91672394	1.06E-43	UP	R13L1_ARATH	Putative disease resistance RPP13-like protein 1
TRINITY_DN2851_c0_g2	2.27380881	6.24E-07	UP	2.377367925	1.73E-07	UP	0.09383387	1	NC
TRINITY_DN4283_c0_g4	0.798247063	0.103203613	NC	1.027229705	0.024302086	UP	0.219750677	1	NC	PTR18_ARATH	Protein NRT1/ PTR FAMILY 3.1
TRINITY_DN5383_c0_g1	1.245958225	0.005340615	UP	0.687923805	0.188630023	NC	-0.567464845	0.601064244	NC	RGA3_SOLBU	Putative disease resistance protein RGA3
TRINITY_DN3767_c1_g1	5.292570945	2.60E-27	UP	5.362627869	4.77E-28	UP	0.060369719	1	NC
TRINITY_DN181_c0_g1	0.804914258	0.128696847	NC	1.274073869	0.006170232	UP	0.459491084	0.848561208	NC
TRINITY_DN54_c0_g1	1.072206011	0.020868664	UP	0.960479377	0.043197435	NC	-0.121464882	1	NC	TOP3A_ARATH	DNA topoisomerase 3-alpha
TRINITY_DN16246_c0_g1	0.724844672	0.183968258	NC	-0.494432336	0.436599756	NC	-1.229929782	0.016605951	DOWN	PFKA7_ARATH	ATP-dependent 6-phosphofructokinase 7 {ECO:0000255|HAMAP-Rule:MF_03186}
TRINITY_DN168_c0_g2	-8.329534953	6.28E-49	DOWN	-7.412037516	8.74E-44	DOWN	0	1	NC	SNAK2_SOLTU	Snakin-2
TRINITY_DN8355_c0_g1	3.297258911	1.17E-14	UP	-1.065102468	0.01940799	DOWN	-4.371710262	1.16E-22	DOWN
TRINITY_DN94881_c0_g1	-1.477382741	0.000900329	DOWN	-1.066968486	0.022391024	DOWN	0.401744545	0.971355062	NC
TRINITY_DN2344_c1_g3	11.09466872	1.11E-31	UP	0	1	NC	-11.51346188	2.14E-40	DOWN	H31_LODEL	Histone H3.1/H3.2
TRINITY_DN5913_c0_g1	-1.206458508	0.009442525	DOWN	0.739669518	0.153789108	NC	1.936213995	1.51E-05	UP
TRINITY_DN1745_c0_g1	1.152045017	0.010828149	UP	1.151348315	0.010622415	UP	-0.010223055	1	NC	RD23C_ARATH	Ubiquitin receptor RAD23c
TRINITY_DN1408_c1_g1	1.440484414	0.000934417	UP	1.330202007	0.002439622	UP	-0.119806551	1	NC
TRINITY_DN4425_c0_g1	1.386816193	0.001686296	UP	-0.905355419	0.064214485	NC	-2.302275221	1.26E-07	DOWN	MLO6_ARATH	MLO-like protein 6
TRINITY_DN1402_c0_g1	1.406557079	0.001925015	UP	1.489940733	0.00087836	UP	0.074143253	1	NC	CAAT1_ARATH	Cationic amino acid transporter 1
TRINITY_DN1096_c0_g4	1.038749016	0.026742303	UP	0.837279957	0.090840138	NC	-0.210982616	1	NC	SPX3_ARATH	SPX domain-containing protein 3
TRINITY_DN17328_c0_g1	-1.260947292	0.006182838	DOWN	-0.394750556	0.537522922	NC	0.857142718	0.177684612	NC
TRINITY_DN14930_c0_g2	6.187962944	1.32E-14	NC	8.86550068	2.47E-33	UP	2.662171233	1.73E-09	UP	MPCP_YEAST	Mitochondrial phosphate carrier protein
TRINITY_DN20661_c0_g1	-2.272594706	5.92E-08	DOWN	-2.321714346	2.89E-08	DOWN	-0.058403529	1	NC
TRINITY_DN10440_c0_g1	-0.452946945	0.455870037	NC	-1.005212375	0.032521764	DOWN	-0.561820402	0.628231496	NC
TRINITY_DN17064_c0_g1	-1.563851246	0.000467907	DOWN	-1.163308035	0.01243578	DOWN	0.391793875	0.9961354	NC	LBD16_ARATH	LOB domain-containing protein 16
TRINITY_DN5725_c0_g4	2.860100222	1.19E-09	UP	3.448287794	2.00E-13	UP	0.578786058	0.593380084	NC	AAP3_ARATH	Amino acid permease 3
TRINITY_DN92_c0_g1	-0.055877719	0.951216733	NC	-1.153044192	0.010248108	DOWN	-1.106686528	0.03075076	DOWN
TRINITY_DN5124_c0_g1	4.682712027	9.25E-15	UP	3.656465179	8.65E-09	NC	-1.036369276	0.063434842	NC	MES2_ARATH	Methylesterase 2
TRINITY_DN8145_c0_g1	2.462580359	1.05E-07	UP	2.694379281	4.98E-09	UP	0.222396116	1	NC
TRINITY_DN7835_c0_g3	1.833790754	9.74E-05	NC	2.573014531	1.78E-08	UP	0.729550415	0.330696685	NC
TRINITY_DN19747_c0_g1	3.286439016	1.10E-11	UP	2.641025011	4.81E-08	NC	-0.657674148	0.451709804	NC	RPK2_ARATH	LRR receptor-like serine/threonine-protein kinase RPK2
TRINITY_DN7337_c0_g1	-1.171969501	0.011100131	DOWN	-1.075515427	0.02121583	DOWN	0.086773165	1	NC
TRINITY_DN41184_c0_g1	-0.962694972	0.065860968	NC	0.917199308	0.064713938	NC	1.871334862	4.92E-05	UP	PHR2_ARATH	Blue-light photoreceptor PHR2
TRINITY_DN7385_c0_g1	1.729125839	0.000110517	UP	2.822786721	1.07E-10	UP	1.084176962	0.038188737	UP	AX6B_SOYBN	Auxin-induced protein 6B
TRINITY_DN12039_c0_g1	8.010803694	1.27E-11	NC	10.15699186	1.83E-25	UP	2.103290453	4.90E-06	UP	RACC_DICDI	Rho-related protein racC
TRINITY_DN21054_c0_g1	-1.113487719	0.014968137	DOWN	-0.212841817	0.779905349	NC	0.892221876	0.130920163	NC
TRINITY_DN41780_c2_g1	1.649000758	0.000162073	UP	1.298256054	0.003916628	UP	-0.360233872	1	NC	ASIL2_ARATH	Trihelix transcription factor ASIL2 {ECO:0000305}
TRINITY_DN1871_c3_g1	3.307827184	6.70E-11	UP	3.244494025	1.38E-10	NC	-0.073213448	1	NC	CBDAS_CANSA	Cannabidiolic acid synthase
TRINITY_DN8208_c0_g3	10.80890553	1.84E-29	UP	0	1	NC	-11.22760193	4.45E-38	DOWN	RS11_DICDI	40S ribosomal protein S11
TRINITY_DN130765_c0_g1	1.78939613	3.99E-05	UP	1.258300856	0.005580584	UP	-0.540572068	0.66412964	NC	BZP43_ARATH	Basic leucine zipper 43
TRINITY_DN1954_c1_g1	-2.327442978	1.07E-07	DOWN	-4.061590148	5.12E-18	DOWN	-1.74511533	0.000729686	NC
TRINITY_DN8107_c1_g1	0.389829786	0.533207874	NC	-0.673717872	0.190985197	NC	-1.072853273	0.037711909	DOWN	TMKL1_ARATH	Putative kinase-like protein TMKL1
TRINITY_DN5575_c0_g2	-2.783743477	3.89E-11	DOWN	-3.264444164	1.56E-14	DOWN	-0.490033265	0.763070424	NC	CR26L_ARATH	Protein ECERIFERUM 26-like
TRINITY_DN12533_c0_g1	0	1	NC	10.23679811	4.62E-26	UP	3.986322852	4.52E-16	UP	ATPF_NEUCR	ATP synthase subunit 4, mitochondrial
TRINITY_DN45290_c0_g1	1.2694308	0.00471425	UP	1.566744742	0.000319412	UP	0.287938249	1	NC	ESCA_ARATH	Putative DNA-binding protein ESCAROLA
TRINITY_DN3623_c1_g1	-1.336715	0.003208309	DOWN	-1.416111072	0.001576193	DOWN	-0.089023903	1	NC
TRINITY_DN1224_c0_g1	1.453125784	0.00074317	UP	1.171078633	0.008292856	UP	-0.29149422	1	NC
TRINITY_DN15_c1_g3	-0.365519464	0.579521579	NC	-1.221682369	0.007347647	DOWN	-0.865661471	0.162370651	NC
TRINITY_DN4201_c0_g2	-1.373173624	0.001591075	DOWN	-1.243959348	0.004706156	DOWN	0.11883511	1	NC
TRINITY_DN6253_c0_g3	0	1	NC	7.503141574	8.33E-33	UP	5.111982598	9.12E-26	UP	RETOL_ARATH	Reticuline oxidase-like protein
TRINITY_DN11495_c0_g1	-1.791523383	2.22E-05	DOWN	-1.558914821	0.000256353	DOWN	0.22337531	1	NC	EXPA9_ARATH	Expansin-A9
TRINITY_DN728_c0_g2	-1.808811247	1.85E-05	DOWN	-2.157984614	2.56E-07	DOWN	-0.358464271	1	NC	CCR1_ARATH	Cinnamoyl-CoA reductase 1
TRINITY_DN6699_c0_g1	3.666071921	2.43E-14	UP	4.692474793	4.76E-22	UP	1.016522913	0.060256362	NC	YLS9_ARATH	Protein YLS9
TRINITY_DN9490_c0_g1	10.46944878	1.14E-27	UP	9.565862324	5.19E-21	NC	-0.947873914	0.104400032	NC	YG75_SCHPO	Uncharacterized membrane protein C776.05
TRINITY_DN3880_c1_g1	1.163522133	0.011896329	UP	1.015936213	0.032475963	UP	-0.157046861	1	NC
TRINITY_DN109730_c0_g1	3.044431004	7.88E-13	UP	2.89184351	7.76E-12	UP	-0.162127964	1	NC
TRINITY_DN8297_c0_g1	-1.387896277	0.001414382	DOWN	-1.300357183	0.002962482	DOWN	0.078108252	1	NC	CLPB1_ARATH	Chaperone protein ClpB1
TRINITY_DN8509_c1_g1	2.784698041	2.03E-09	NC	3.665548985	4.00E-15	UP	0.871143091	0.169935192	NC
TRINITY_DN11568_c0_g1	-1.660136833	0.000155125	DOWN	-1.010540282	0.031824692	DOWN	0.640833667	0.48820613	NC
TRINITY_DN17607_c0_g1	6.426422242	9.23E-06	NC	10.61765318	3.47E-28	UP	4.149953236	1.82E-17	UP	RL21B_SCHPO	60S ribosomal protein L21-B
TRINITY_DN272_c0_g2	1.672769112	0.000174538	UP	1.555840514	0.000513488	UP	-0.12693069	1	NC	NAC25_ARATH	NAC transcription factor 25
TRINITY_DN8049_c0_g2	1.402968662	0.002076391	UP	1.87951835	1.82E-05	UP	0.466887714	0.826133987	NC	MYBF_ARATH	Putative Myb family transcription factor At1g14600
TRINITY_DN24986_c0_g1	7.965439187	2.12E-28	UP	7.09915789	3.56E-22	NC	-0.881367349	0.149703032	NC	GRXC8_ARATH	Glutaredoxin-C8
TRINITY_DN1758_c0_g1	2.533563236	9.23E-09	UP	3.324668485	6.12E-14	UP	0.78108116	0.242517508	NC	CINV1_ARATH	Alkaline/neutral invertase CINV1 {ECO:0000305}
TRINITY_DN9703_c0_g1	-2.213022217	1.74E-07	DOWN	-2.378550205	1.85E-08	DOWN	-0.173933405	1	NC
TRINITY_DN4879_c0_g1	-1.830835099	1.51E-05	DOWN	-1.086818619	0.01599151	DOWN	0.734508024	0.29638004	NC	CRK8_ARATH	Cysteine-rich receptor-like protein kinase 8
TRINITY_DN7770_c0_g1	9.523054341	1.40E-20	NC	12.10137414	2.71E-40	UP	2.535045885	6.02E-09	UP	RL18A_ICTPU	60S ribosomal protein L18a
TRINITY_DN3307_c0_g1	2.604758368	6.34E-10	UP	2.461126328	4.61E-09	UP	-0.153014734	1	NC	TBL39_ARATH	Protein trichome birefringence-like 39
TRINITY_DN17975_c0_g1	1.954690918	6.17E-06	UP	1.507972417	0.000645441	UP	-0.456799774	0.835925247	NC
TRINITY_DN2243_c0_g1	1.031441737	0.027671274	UP	0.247829801	0.741216709	NC	-0.793144682	0.226216892	NC	YCF36_PORPU	Uncharacterized protein ycf36
TRINITY_DN320_c2_g1	-1.108407841	0.013741593	DOWN	-1.20110231	0.006549151	DOWN	-0.10192499	1	NC	ENASE_DANRE	Cytosolic endo-beta-N-acetylglucosaminidase
TRINITY_DN52043_c0_g2	0	1	NC	12.71428943	2.69E-45	UP	13.08868083	1.50E-53	UP	HSP80_SOLLC	Heat shock cognate protein 80
TRINITY_DN130520_c0_g1	1.397727995	0.003727227	NC	1.849440495	5.46E-05	UP	0.442102865	0.889062208	NC	CER2_ARATH	Protein ECERIFERUM 1
TRINITY_DN7667_c0_g1	8.454214353	2.88E-14	NC	10.62555844	3.00E-28	UP	2.128276647	2.57E-06	UP	RIBBA_AQUAE	Riboflavin biosynthesis protein RibBA {ECO:0000255|HAMAP-Rule:MF_01283}
TRINITY_DN1946_c1_g2	1.567826078	0.000253855	UP	1.476700574	0.000602418	UP	-0.100461723	1	NC	PLY12_ARATH	Probable pectate lyase 12
TRINITY_DN6007_c0_g1	-2.331366506	9.42E-08	DOWN	-2.058185195	2.26E-06	DOWN	0.264071923	1	NC	CE045_DANRE	UPF0544 protein C5orf45 homolog
TRINITY_DN5552_c1_g1	-1.119023115	0.013546369	DOWN	-0.512160992	0.370597437	NC	0.596813883	0.543417244	NC
TRINITY_DN7149_c0_g1	-1.217457457	0.006259812	DOWN	-0.999352222	0.03041593	NC	0.208733267	1	NC	NFYA9_ARATH	Nuclear transcription factor Y subunit A-9
TRINITY_DN6425_c3_g1	1.908513417	1.98E-05	UP	3.147192029	8.74E-13	UP	1.229451609	0.012549266	UP
TRINITY_DN22134_c0_g1	1.034941858	0.035149263	NC	1.709495021	0.000136959	UP	0.664715997	0.447020472	NC	Y5343_ARATH	Probable LRR receptor-like serine/threonine-protein kinase At1g53430
TRINITY_DN10299_c0_g1	-1.279633578	0.005063951	DOWN	-0.876578485	0.0764661	NC	0.393775776	0.989262682	NC
TRINITY_DN2643_c0_g3	2.038080743	2.23E-06	UP	2.029205608	2.35E-06	UP	-0.018766557	1	NC
TRINITY_DN6947_c0_g1	10.81760554	1.63E-29	UP	10.36843506	3.12E-26	UP	-0.492960302	0.77567779	NC	PHO4_NEUCR	Phosphate-repressible phosphate permease pho-4 {ECO:0000303|PubMed:2531109}
TRINITY_DN24318_c0_g1	1.254235819	0.006894174	UP	0.657583858	0.237972724	NC	-0.606261995	0.540396035	NC	TF29_SCHPO	Transposon Tf2-9 polyprotein
TRINITY_DN115489_c0_g1	0	1	NC	10.51372563	2.28E-27	UP	10.88813221	2.27E-35	UP
TRINITY_DN28001_c0_g1	-11.28090002	2.98E-37	DOWN	-11.31602605	5.85E-38	DOWN	0	1	NC
TRINITY_DN677_c1_g1	0.369147317	0.561530205	NC	1.36360492	0.001693613	UP	0.984998124	0.069162363	NC	GSTU8_ARATH	Glutathione S-transferase U8
TRINITY_DN1405_c0_g2	1.458401169	0.000776562	UP	0.924412033	0.050186332	NC	-0.543545902	0.649045198	NC
TRINITY_DN1060_c1_g1	-0.54334606	0.328371037	NC	-1.029320367	0.023957402	DOWN	-0.49548034	0.753322223	NC
TRINITY_DN553_c0_g2	-1.733457051	5.12E-05	DOWN	1.211119189	0.006347179	UP	2.935409147	8.76E-12	UP	ZAT10_ARATH	Zinc finger protein ZAT10
TRINITY_DN6649_c0_g2	-0.540325379	0.334982262	NC	-1.879170388	9.06E-06	DOWN	-1.34835496	0.004496124	DOWN
TRINITY_DN11253_c0_g1	1.531955442	0.000548109	UP	1.338533363	0.003019164	UP	-0.203332014	1	NC	Y2182_ARATH	Leucine-rich repeat receptor-like tyrosine-protein kinase At2g41820
TRINITY_DN3785_c0_g3	-1.535436119	0.000333727	DOWN	-1.039322695	0.021987447	DOWN	0.486485057	0.768911382	NC
TRINITY_DN38318_c0_g1	0	1	NC	10.07337987	7.48E-25	UP	10.4491639	7.29E-32	UP
TRINITY_DN786_c3_g1	-0.376434851	0.551974522	NC	-1.165579619	0.008876948	DOWN	-0.798702379	0.211977595	NC	RIBA1_ORYSJ	Probable bifunctional riboflavin biosynthesis protein RIBA 1, chloroplastic
TRINITY_DN116548_c0_g1	-1.285096418	0.004975279	DOWN	-0.257976536	0.728952161	NC	1.018212315	0.067494008	NC	RHA2B_ARATH	Probable E3 ubiquitin-protein ligase RHA2B
TRINITY_DN2626_c0_g1	2.436965395	4.58E-08	UP	2.428611377	4.96E-08	UP	-0.018109445	1	NC	FB119_ARATH	F-box protein At2g27310
TRINITY_DN8778_c0_g1	-9.68562841	1.25E-24	NC	0.869943464	0.076368143	NC	10.96507103	5.73E-36	UP
TRINITY_DN28508_c0_g2	0.282187493	0.750718781	NC	1.784010775	0.000131555	UP	1.492506305	0.001991445	UP
TRINITY_DN13519_c0_g3	-1.533064594	0.000442735	DOWN	-1.144960547	0.011557017	DOWN	0.379314628	0.9961354	NC
TRINITY_DN4832_c0_g1	3.31349338	7.43E-12	UP	3.522411403	3.28E-13	UP	0.198757944	1	NC
TRINITY_DN1594_c1_g1	-4.050129055	2.83E-18	DOWN	-2.753477503	2.86E-10	DOWN	1.287863271	0.022451019	NC	CIPKJ_ARATH	CBL-interacting serine/threonine-protein kinase 19
TRINITY_DN6914_c0_g1	-2.715143782	9.37E-10	DOWN	-2.666050827	1.58E-09	DOWN	0.039954636	1	NC	STP10_ARATH	Sugar transport protein 10
TRINITY_DN8107_c1_g2	1.130318357	0.012207073	UP	0.968203095	0.037384463	NC	-0.172381051	1	NC
TRINITY_DN8585_c1_g2	1.738289534	0.000214672	UP	0.203480534	0.855639583	NC	-1.545652522	0.001137239	DOWN
TRINITY_DN9477_c0_g1	1.24816691	0.004474564	UP	1.353559377	0.00172179	UP	0.095164383	1	NC
TRINITY_DN6495_c0_g3	1.355506628	0.003024807	UP	1.283875358	0.005426746	UP	-0.0814702	1	NC
TRINITY_DN524_c1_g2	1.225014987	0.006458512	UP	0.703514032	0.174043513	NC	-0.530589519	0.690061039	NC
TRINITY_DN16488_c0_g1	0	1	NC	10.48769562	3.64E-27	UP	2.822427589	5.69E-10	UP
TRINITY_DN4388_c0_g1	1.007917485	0.028235762	UP	0.840110855	0.080121667	NC	-0.177375913	1	NC	IAA9_ARATH	Auxin-responsive protein IAA9
TRINITY_DN550_c0_g1	1.530174311	0.00040346	UP	1.100865159	0.01540336	UP	-0.438914544	0.869073135	NC	LCKB2_ARATH	Sphingoid long-chain bases kinase 2, mitochondrial
TRINITY_DN21825_c0_g1	2.356825334	3.48E-08	UP	2.436677135	1.12E-08	UP	0.070824248	1	NC	R13L1_ARATH	Putative disease resistance RPP13-like protein 1
TRINITY_DN86128_c0_g2	10.8931734	4.42E-30	UP	0	1	NC	-11.31173914	9.61E-39	DOWN
TRINITY_DN490_c0_g1	2.304185766	5.29E-08	UP	2.511633892	2.88E-09	UP	0.197730252	1	NC	REMO_SOLTU	Remorin
TRINITY_DN617_c0_g1	0.76082921	0.176021993	NC	1.347188294	0.004569077	UP	0.577007472	0.615431255	NC
TRINITY_DN4102_c1_g1	-11.59259754	6.99E-40	DOWN	-5.248724049	5.97E-26	DOWN	0	1	NC
TRINITY_DN12322_c0_g1	1.02650275	0.025983719	UP	0.572868965	0.297258772	NC	-0.463564653	0.822938112	NC	Y5639_ARATH	Probable leucine-rich repeat receptor-like protein kinase At5g63930
TRINITY_DN746_c0_g1	-1.155684248	0.010007486	DOWN	-0.802241961	0.100599457	NC	0.343869461	1	NC	RNF10_HUMAN	RING finger protein 10
TRINITY_DN4700_c0_g1	9.767717067	3.20E-48	UP	11.70723111	2.38E-64	UP	1.926488376	1.01E-05	UP	UBIQP_HORVU	Polyubiquitin
TRINITY_DN12562_c0_g1	10.56340806	2.14E-28	UP	9.544649635	6.88E-21	NC	-1.063060596	0.050457587	NC	SMO22_ARATH	Methylsterol monooxygenase 2-2
TRINITY_DN296_c1_g1	-1.483392758	0.000859025	DOWN	-0.481167282	0.421323346	NC	0.993034014	0.077622257	NC	PUB4_ARATH	U-box domain-containing protein 4
TRINITY_DN5881_c1_g1	3.374648947	2.91E-11	UP	3.246643652	1.59E-10	NC	-0.138162811	1	NC	TTC1_BOVIN	Tetratricopeptide repeat protein 1
TRINITY_DN646_c3_g1	-1.445470304	0.000845879	DOWN	-0.84739371	0.077691303	NC	0.58868936	0.556165561	NC	ETR2_ARATH	Ethylene receptor 2
TRINITY_DN146277_c0_g1	0	1	NC	10.79945677	1.29E-29	UP	8.56403015	3.43E-35	UP	SRRDP_PHYPO	Serine/arginine-rich protein PSR {ECO:0000303|PubMed:21149255}
TRINITY_DN10321_c0_g2	-1.193173455	0.00892189	DOWN	-0.880165131	0.070242898	NC	0.303916141	1	NC	EXL3_ARATH	GDSL esterase/lipase EXL3
TRINITY_DN5294_c0_g1	-1.982607544	1.38E-05	NC	0.219353072	0.785976993	NC	2.193489431	1.60E-06	UP	C734A_ARATH	Cytochrome P450 734A1
TRINITY_DN17966_c0_g1	-0.288470559	0.719429121	NC	1.436169999	0.001221567	UP	1.714310989	0.000177055	UP
TRINITY_DN10364_c0_g1	-3.390964274	1.61E-13	DOWN	-5.057418759	9.77E-24	DOWN	-1.681467437	0.003802237	NC
TRINITY_DN1167_c0_g1	1.421965135	0.002833175	UP	1.313675087	0.00678538	NC	-0.118051396	1	NC	SRF3_ARATH	Protein STRUBBELIG-RECEPTOR FAMILY 3
TRINITY_DN123400_c0_g1	-1.37298594	0.001905131	DOWN	-0.992497139	0.033762845	NC	0.371266108	1	NC	CXE1_ACTER	Carboxylesterase 1
TRINITY_DN16906_c0_g1	3.291813853	5.15E-13	UP	0.489593824	0.450540294	NC	-2.812929823	3.36E-10	DOWN
TRINITY_DN2270_c0_g1	2.483863395	5.00E-08	UP	3.188304984	1.72E-12	UP	0.694889404	0.368555489	NC
TRINITY_DN8603_c0_g2	-0.101532712	0.909930813	NC	0.966357464	0.044225875	NC	1.058551963	0.048541313	UP	TCP2_ARATH	Transcription factor TCP2
TRINITY_DN1243_c0_g2	-4.008198542	2.44E-18	DOWN	-4.372943678	7.25E-21	DOWN	-0.374677241	1	NC	AB21G_ARATH	ABC transporter G family member 21
TRINITY_DN13630_c0_g1	1.29966948	0.003227137	UP	1.549248188	0.000316236	UP	0.239738757	1	NC	DRL21_ARATH	Putative disease resistance protein At3g14460
TRINITY_DN506_c1_g1	1.02266766	0.031263674	UP	0.832120146	0.096372343	NC	-0.2003531	1	NC	YCH4_YEAST	Putative transposon Ty5-1 protein YCL074W
TRINITY_DN2261_c1_g2	11.2935319	2.90E-33	UP	0	1	NC	-11.71226467	5.45E-42	DOWN	FRAY2_DICDI	Serine/threonine-protein kinase fray2 {ECO:0000250|UniProtKB:O61125, ECO:0000312|EMBL:EAL69242.1}
TRINITY_DN367_c0_g1	1.033654927	0.024503939	UP	1.207029099	0.006572073	UP	0.163628194	1	NC	CBSX3_ARATH	CBS domain-containing protein CBSX3, mitochondrial
TRINITY_DN8872_c2_g1	1.133347527	0.024169058	NC	3.353290653	8.50E-13	UP	2.212819148	2.40E-06	UP
TRINITY_DN12142_c0_g2	-1.14581599	0.011575673	DOWN	-0.66531914	0.205493927	NC	0.47116452	0.812401219	NC
TRINITY_DN12609_c0_g2	7.411491292	1.49E-08	NC	10.76884031	2.30E-29	UP	3.31538412	6.30E-13	UP	EF1B_DICDI	Elongation factor 1-beta
TRINITY_DN3018_c0_g2	-2.039837764	2.50E-06	DOWN	-2.028966152	2.66E-06	DOWN	0.001322606	1	NC
TRINITY_DN21025_c0_g1	1.03225751	0.025173534	UP	0.823885304	0.091163536	NC	-0.21799705	1	NC
TRINITY_DN2483_c0_g3	0	1	NC	8.255706127	1.31E-34	UP	11.97262232	3.56E-44	UP	RLA2_PODAS	60S acidic ribosomal protein P2
TRINITY_DN1952_c0_g1	0.754389289	0.130247501	NC	-0.967479308	0.036820206	NC	-1.731460983	9.29E-05	DOWN	FB345_ARATH	F-box protein At4g00755
TRINITY_DN12060_c0_g1	4.515786801	7.19E-17	UP	3.06498687	6.41E-08	NC	-1.461071574	0.002577882	DOWN
TRINITY_DN2222_c2_g1	0.65996449	0.263095056	NC	2.031756039	5.02E-06	UP	1.362673971	0.004764418	UP	ERF80_ARATH	Ethylene-responsive transcription factor 9
TRINITY_DN56358_c0_g1	-1.131177489	0.013048596	DOWN	-1.489884388	0.000646035	DOWN	-0.368529883	1	NC
TRINITY_DN3266_c0_g1	2.874452461	2.42E-11	UP	1.816082011	2.75E-05	UP	-1.067953556	0.040442328	DOWN	GAT22_ARATH	Putative GATA transcription factor 22
TRINITY_DN53202_c0_g1	0.495219032	0.388572324	NC	-0.662099315	0.201637909	NC	-1.166701195	0.018782336	DOWN
TRINITY_DN130736_c0_g1	1.238657138	0.006030737	UP	0.537404831	0.350445677	NC	-0.710776458	0.339240281	NC	PP222_ARATH	Pentatricopeptide repeat-containing protein At3g09650, chloroplastic
TRINITY_DN4928_c0_g1	1.269490545	0.003875605	UP	0.664638936	0.200048473	NC	-0.614076976	0.501244066	NC	SKI15_ARATH	SKP1-interacting partner 15
TRINITY_DN7829_c0_g1	-1.521520101	0.000689974	DOWN	-1.853429617	2.52E-05	DOWN	-0.341617714	1	NC
TRINITY_DN4196_c0_g1	-1.952561494	3.41E-06	DOWN	-1.676748335	7.49E-05	DOWN	0.26654134	1	NC	HSP16_SOYBN	18.5 kDa class I heat shock protein
TRINITY_DN33291_c0_g1	-1.960126659	3.49E-06	DOWN	-0.401149383	0.516592545	NC	1.549350339	0.000667365	UP	MT3_CARPA	Metallothionein-like protein type 3
TRINITY_DN1116_c0_g1	-1.020947383	0.025949807	DOWN	-1.092892417	0.015237403	DOWN	-0.081457282	1	NC	MAOX_VITVI	NADP-dependent malic enzyme
TRINITY_DN11756_c0_g1	0.683659607	0.23396499	NC	1.261544799	0.008047739	UP	0.568521747	0.628107351	NC
TRINITY_DN2039_c0_g2	1.175695677	0.008663274	UP	1.333049861	0.002301265	UP	0.148032528	1	NC	NFYB3_ARATH	Nuclear transcription factor Y subunit B-3
TRINITY_DN12620_c1_g1	0	1	NC	10.37075847	2.96E-26	UP	3.445293912	2.15E-13	UP	TBP_EMENI	TATA-box-binding protein
TRINITY_DN6630_c0_g1	-2.007477976	5.89E-06	DOWN	-2.411892601	4.88E-08	DOWN	-0.414182573	0.995025762	NC
TRINITY_DN11767_c0_g2	2.931974431	4.65E-08	NC	5.114883312	6.24E-22	UP	2.17266283	1.72E-06	UP
TRINITY_DN2228_c0_g1	-1.710145334	5.45E-05	DOWN	-1.774681508	2.60E-05	DOWN	-0.073937633	1	NC	USPAL_ARATH	Universal stress protein A-like protein
TRINITY_DN2242_c0_g3	-1.826415012	1.67E-05	DOWN	-2.21579217	1.47E-07	DOWN	-0.398667921	0.957681787	NC	SABP2_TOBAC	Salicylic acid-binding protein 2
TRINITY_DN8690_c0_g1	-1.564038887	0.000251722	DOWN	-1.477497864	0.000571517	DOWN	0.077118637	1	NC	GPT1_ARATH	Glucose-6-phosphate/phosphate translocator 1, chloroplastic
TRINITY_DN8591_c0_g1	1.844749419	2.28E-05	UP	1.877349679	1.53E-05	UP	0.022433433	1	NC
TRINITY_DN1789_c0_g1	1.94890333	5.39E-06	UP	2.058819023	1.40E-06	UP	0.100014671	1	NC
TRINITY_DN17049_c0_g2	-1.770002138	4.30E-05	DOWN	-1.109046564	0.015366221	DOWN	0.651791149	0.456997089	NC	EXL1_ARATH	GDSL esterase/lipase EXL1
TRINITY_DN264_c0_g1	3.61206121	5.46E-16	UP	3.051844753	4.00E-12	UP	-0.570039896	0.59579285	NC
TRINITY_DN318_c1_g1	-1.029517366	0.025667586	DOWN	-0.191485799	0.805418865	NC	0.828547311	0.183814488	NC	PPSP2_ARATH	Inorganic pyrophosphatase 2
TRINITY_DN1923_c0_g1	1.004860714	0.030214809	UP	0.973644249	0.036486024	NC	-0.040536533	1	NC	Y3720_ARATH	UPF0481 protein At3g47200
TRINITY_DN5401_c0_g1	10.99632553	6.84E-31	UP	12.62467135	1.44E-44	UP	1.584725435	0.00048947	UP	RS15_ORYSJ	40S ribosomal protein S15
TRINITY_DN1153_c0_g2	-1.306301743	0.003765253	DOWN	-2.366575703	5.03E-08	DOWN	-1.069840867	0.054259063	NC
TRINITY_DN1053_c3_g1	0.866563899	0.075135381	NC	1.123010397	0.013388042	UP	0.24683747	1	NC	UBP12_ARATH	Ubiquitin carboxyl-terminal hydrolase 12
TRINITY_DN1770_c0_g1	0.377252307	0.561280062	NC	1.315481607	0.002991041	UP	0.928844584	0.10269517	NC	GEML7_ARATH	GEM-like protein 7
TRINITY_DN4493_c1_g1	1.177883932	0.00868542	UP	1.266764124	0.004136514	UP	0.079578791	1	NC	RPS4R_ARATH	Inactive disease resistance protein RPS4 {ECO:0000303|PubMed:10571887}
TRINITY_DN478_c0_g4	1.072205467	0.019316801	UP	1.010176089	0.029071645	UP	-0.071626127	1	NC	HT1_ARATH	Serine/threonine-protein kinase HT1
TRINITY_DN9859_c0_g1	-1.836855499	1.45E-05	DOWN	-2.60860241	6.37E-10	DOWN	-0.781013054	0.240332848	NC	CBSX5_ARATH	CBS domain-containing protein CBSX5
TRINITY_DN1109_c0_g1	-1.135766105	0.011404958	DOWN	-1.19775578	0.006856256	DOWN	-0.071556198	1	NC
TRINITY_DN2835_c0_g1	-1.011982868	0.027181846	DOWN	-1.099755509	0.01424988	DOWN	-0.097176426	1	NC	GDL76_ARATH	GDSL esterase/lipase At5g14450
TRINITY_DN5359_c0_g1	0.599011011	0.300158506	NC	1.105917298	0.01931052	UP	0.497671984	0.766374065	NC	CRK10_ARATH	Cysteine-rich receptor-like protein kinase 10
TRINITY_DN3741_c0_g1	2.13470591	9.86E-07	UP	1.706381995	0.000119233	UP	-0.437512665	0.87989189	NC	PGLR_VITVI	Probable polygalacturonase
TRINITY_DN8506_c0_g1	1.391435755	0.001471612	UP	1.225381164	0.005891561	UP	-0.17568885	1	NC	AOX2_SOYBN	Ubiquinol oxidase 2, mitochondrial
TRINITY_DN4862_c0_g2	7.388351113	1.93E-08	NC	10.41233426	1.44E-26	UP	2.981081713	1.18E-10	UP
TRINITY_DN22314_c0_g4	10.5641179	2.14E-28	UP	9.340433952	2.18E-19	NC	-1.268028244	0.01142555	DOWN	RL30_NEUCR	60S ribosomal protein L30
TRINITY_DN17743_c0_g1	7.552689129	3.18E-09	NC	10.94090003	9.37E-31	UP	3.345923228	2.45E-13	UP	TMC1_YEAST	AN1-type zinc finger protein TMC1 {ECO:0000305}
TRINITY_DN8029_c0_g1	9.930792781	1.40E-23	NC	11.58918416	4.65E-36	UP	1.614722835	0.00043698	UP	EF1G_MACFA	Elongation factor 1-gamma
TRINITY_DN55912_c0_g1	3.038175796	7.43E-12	UP	0.216625627	0.620228054	NC	-2.831265165	7.92E-10	DOWN
TRINITY_DN5756_c1_g1	10.01461714	3.31E-24	NC	12.65787286	7.78E-45	UP	2.600024883	2.04E-09	UP	UBIQP_HORVU	Polyubiquitin
TRINITY_DN15524_c0_g1	2.846482641	8.00E-08	NC	4.359106985	2.37E-17	UP	1.50299165	0.001617889	UP	SRG1_ARATH	Protein SRG1
TRINITY_DN9704_c0_g3	8.502574562	1.47E-14	NC	12.53383332	8.33E-44	UP	3.988204978	9.57E-19	UP	RL7_CAEEL	60S ribosomal protein L7
TRINITY_DN9632_c0_g1	1.418389324	0.002566536	UP	1.737704982	0.00013122	UP	0.309967257	1	NC	RAD51_SOLLC	DNA repair protein RAD51 homolog
TRINITY_DN67_c4_g1	1.247978195	0.005567531	UP	1.148568393	0.011746809	UP	-0.108868155	1	NC	CCD32_ARATH	Cyclin-D3-2
TRINITY_DN4869_c0_g1	1.028144807	0.025507556	UP	0.570672737	0.299348913	NC	-0.466984822	0.813600631	NC
TRINITY_DN9479_c0_g1	4.481303992	3.49E-21	UP	3.3000943	9.83E-13	NC	-1.192569797	0.018530033	DOWN	Y4885_ARATH	Probable LRR receptor-like serine/threonine-protein kinase At4g08850
TRINITY_DN11958_c0_g1	1.746913363	4.81E-05	UP	1.48796747	0.000643327	UP	-0.268567116	1	NC	TL1Y_ARATH	Thylakoid lumenal 17.9 kDa protein, chloroplastic
TRINITY_DN670_c0_g3	1.294711796	0.003234245	UP	1.084080681	0.016642856	UP	-0.220031124	1	NC	CSE_ARATH	Caffeoylshikimate esterase
TRINITY_DN13390_c0_g3	8.034320715	8.34E-12	NC	12.30137982	6.29E-42	UP	4.224456224	2.75E-20	UP	GRG1_NEUCR	Glucose-repressible gene protein
TRINITY_DN3102_c2_g1	2.499954226	3.10E-09	UP	2.429855146	7.67E-09	UP	-0.079518037	1	NC	BBX25_ARATH	B-box zinc finger protein 25 {ECO:0000303|PubMed:19920209}
TRINITY_DN12846_c0_g1	10.4355739	2.06E-27	UP	12.31057901	5.37E-42	UP	1.831387775	3.87E-05	UP	RL7_NEUCR	60S ribosomal protein L7
TRINITY_DN5626_c0_g1	8.637213974	2.10E-15	NC	10.19531715	9.17E-26	UP	1.514836655	0.001761675	UP	MYBM_DICDI	Myb-like protein M
TRINITY_DN325_c1_g3	-1.129685246	0.01233573	DOWN	-2.156190454	3.38E-07	DOWN	-1.036400724	0.052093876	NC
TRINITY_DN14964_c0_g1	8.706440064	7.08E-16	NC	11.11558804	3.46E-32	UP	2.366247901	1.10E-07	UP	PTR2_SCHPO	Probable peptide transporter ptr2
TRINITY_DN10012_c0_g1	-1.429504136	0.001005282	DOWN	-1.399022493	0.001287334	DOWN	0.020671632	1	NC
TRINITY_DN3092_c0_g2	1.701644866	9.96E-05	UP	0.739232542	0.153889027	NC	-0.972747555	0.082482773	NC
TRINITY_DN18545_c0_g1	4.142897599	4.20E-09	NC	5.826817545	7.62E-20	UP	1.673865126	0.000372029	UP	6PGD2_YEAST	6-phosphogluconate dehydrogenase, decarboxylating 2
TRINITY_DN3810_c0_g1	-1.229049959	0.005297321	DOWN	-1.604943644	0.000158375	DOWN	-0.385274231	0.973241292	NC	DHSO_ARATH	Sorbitol dehydrogenase
TRINITY_DN15007_c0_g1	0.827195896	0.119686908	NC	1.114140798	0.022099375	UP	0.277498934	1	NC	MB3R1_ARATH	Myb-related protein 3R-1
TRINITY_DN1152_c1_g1	1.245648499	0.004941989	UP	0.439748264	0.46752381	NC	-0.815738562	0.193393591	NC	DEGP5_ARATH	Protease Do-like 5, chloroplastic
TRINITY_DN5450_c0_g1	1.552060611	0.000283065	UP	0.337038495	0.60704984	NC	-1.224646571	0.011839488	DOWN
TRINITY_DN4681_c0_g1	9.841637199	6.16E-23	NC	11.55344426	8.94E-36	UP	1.66827978	0.00025528	UP	FAT2_YEAST	Peroxisomal-coenzyme A synthetase
TRINITY_DN147174_c0_g1	-5.444837598	1.71E-30	DOWN	-6.309360781	2.59E-37	DOWN	-0.8749878	0.21776625	NC	CBPR_HEVBR	Citrate-binding protein
TRINITY_DN1723_c1_g1	2.51217971	6.08E-07	UP	1.414520673	0.013524699	NC	-1.107459388	0.041636718	DOWN
TRINITY_DN1202_c0_g1	1.494903088	0.000551512	UP	2.206129466	1.56E-07	UP	0.701909289	0.343900097	NC	DIR23_ARATH	Dirigent protein 23
TRINITY_DN18417_c0_g1	-0.99980365	0.039208489	NC	-1.541270859	0.000605853	DOWN	-0.551053192	0.700917764	NC	TF26_SCHPO	Transposon Tf2-6 polyprotein
TRINITY_DN5846_c0_g1	2.083690842	2.57E-05	NC	3.931300174	1.53E-16	UP	1.838831244	4.91E-05	UP	YL154_YEAST	Uncharacterized protein YLR154C-G
TRINITY_DN16315_c0_g1	0.31991675	0.655363425	NC	-1.379504569	0.002840655	NC	-1.709295463	0.000234532	DOWN
TRINITY_DN6360_c0_g1	11.27593589	4.00E-33	UP	12.72879577	2.04E-45	UP	1.409163252	0.002619497	UP	RS5_HUMAN	40S ribosomal protein S5
TRINITY_DN5276_c0_g1	-0.700516473	0.173448786	NC	0.523104192	0.357062114	NC	1.214632504	0.013378017	UP	R13L3_ARATH	Putative disease resistance RPP13-like protein 3
TRINITY_DN320_c0_g2	0.540684021	0.332337892	NC	1.306278259	0.002775188	UP	0.755947779	0.26381708	NC	MCAT_ARATH	Mitochondrial carnitine/acylcarnitine carrier-like protein
TRINITY_DN3842_c0_g2	12.76404874	2.04E-45	UP	14.19236587	1.04E-57	UP	1.384561303	0.003074371	UP	EF1A_PODCU	Elongation factor 1-alpha
TRINITY_DN1375_c0_g1	1.018405455	0.027765136	UP	0.663446417	0.2065545	NC	-0.364491331	1	NC
TRINITY_DN4525_c0_g1	1.41339566	0.002170953	UP	1.876318943	2.48E-05	UP	0.453266878	0.858029863	NC	Y3885_ARATH	Uncharacterized protein At3g28850
TRINITY_DN47_c0_g1	1.020877868	0.043641031	NC	1.562368989	0.000657897	UP	0.532337873	0.702895962	NC	PEX4_ARATH	Protein PEROXIN-4
TRINITY_DN11331_c0_g1	-1.662221816	0.000307444	DOWN	-2.051033033	5.49E-06	DOWN	-0.399023606	1	NC
TRINITY_DN10662_c0_g1	2.781729631	8.76E-09	NC	3.297997025	5.31E-12	UP	0.506683349	0.75181578	NC	ASPG2_ARATH	Protein ASPARTIC PROTEASE IN GUARD CELL 2
TRINITY_DN3512_c0_g1	3.638378557	1.61E-13	UP	3.943842041	9.50E-16	UP	0.294923792	1	NC	RTNLQ_ARATH	Reticulon-like protein B17
TRINITY_DN14044_c0_g1	5.507800304	1.95E-19	UP	5.544182789	4.46E-20	UP	0.024845773	1	NC
TRINITY_DN5079_c0_g3	4.290143715	7.80E-19	UP	3.14103301	4.09E-11	UP	-1.158420218	0.024082983	DOWN
TRINITY_DN7658_c1_g2	-1.57864007	0.000383863	DOWN	-1.284521793	0.004644044	DOWN	0.28531691	1	NC
TRINITY_DN419_c0_g2	0.302370113	0.662131325	NC	-0.902714608	0.061545196	NC	-1.214837063	0.014738309	DOWN	Y1571_ARATH	Probable leucine-rich repeat receptor-like protein kinase At1g35710
TRINITY_DN114_c0_g2	-0.46222768	0.450380739	NC	0.663138051	0.214719132	NC	1.115710869	0.031477156	UP
TRINITY_DN8628_c0_g1	7.923352946	3.72E-11	NC	11.96538456	3.70E-39	UP	3.999325364	1.78E-18	UP	NDK_CARHZ	Nucleoside diphosphate kinase {ECO:0000255|HAMAP-Rule:MF_00451}
TRINITY_DN918_c2_g2	9.225464617	1.92E-18	NC	11.14434322	2.02E-32	UP	1.875472276	3.33E-05	UP
TRINITY_DN7499_c0_g1	1.180643673	0.008379265	UP	1.597431751	0.000188841	UP	0.407420719	0.935551789	NC	FLA7_ARATH	Fasciclin-like arabinogalactan protein 7
TRINITY_DN2428_c0_g3	2.266625138	2.96E-07	UP	2.023870682	5.13E-06	UP	-0.252280427	1	NC	GAE6_ARATH	UDP-glucuronate 4-epimerase 6
TRINITY_DN115582_c0_g1	5.806682462	5.51E-16	NC	7.94835688	2.62E-31	UP	2.129408291	1.66E-06	UP
TRINITY_DN2592_c2_g1	7.858351276	9.01E-11	NC	11.00397097	2.87E-31	UP	3.102948728	6.68E-12	UP	HSP7M_EMENI	Heat shock 70 kDa protein
TRINITY_DN16031_c0_g1	1.702632152	0.000150994	UP	-0.05471397	0.964071801	NC	-1.766561874	0.000111268	DOWN	GSO1_ARATH	LRR receptor-like serine/threonine-protein kinase GSO1
TRINITY_DN4904_c0_g2	4.45290971	3.62E-17	UP	0	1	NC	-4.480419163	4.19E-20	DOWN	RVE6_ARATH	Protein REVEILLE 6
TRINITY_DN7580_c0_g3	1.852633569	1.26E-05	UP	2.916898019	5.24E-12	UP	1.054939822	0.042892196	UP	PMAT2_ARATH	Phenolic glucoside malonyltransferase 2
TRINITY_DN735_c3_g1	2.032434247	5.87E-06	UP	2.28520413	2.56E-07	UP	0.24321165	1	NC
TRINITY_DN718_c0_g2	-0.787403164	0.119704041	NC	0.419764118	0.500746408	NC	1.197888117	0.016874137	UP
TRINITY_DN284_c0_g1	1.094062267	0.023360554	UP	0.681131869	0.220876515	NC	-0.423156068	0.932235188	NC	MATE6_ARATH	MATE efflux family protein 6
TRINITY_DN964_c0_g2	-1.064573672	0.019130599	DOWN	-1.428941371	0.000926295	DOWN	-0.373645015	0.994055166	NC
TRINITY_DN8463_c1_g2	-1.399163914	0.001276343	DOWN	-1.260292207	0.004169187	DOWN	0.12966499	1	NC	CBSX6_ARATH	CBS domain-containing protein CBSX6
TRINITY_DN8242_c0_g2	3.526730948	1.83E-15	UP	1.929155479	1.27E-05	UP	-1.607197213	0.000426495	DOWN	UBQ11_ARATH	Polyubiquitin 11
TRINITY_DN10692_c0_g1	-0.201210255	0.792970178	NC	-1.047290929	0.022099375	DOWN	-0.855336434	0.158153039	NC
TRINITY_DN2124_c0_g2	1.367103625	0.001627478	UP	1.119788153	0.01225051	UP	-0.25697149	1	NC	PST2_GOSHI	Photosystem II 5 kDa protein, chloroplastic
TRINITY_DN16924_c0_g1	-2.245181199	8.22E-08	DOWN	-2.537958396	1.32E-09	DOWN	-0.302532404	1	NC
TRINITY_DN2150_c0_g2	-1.153353464	0.010895204	DOWN	-0.428355337	0.483274635	NC	0.715552491	0.330989488	NC	RNS1_ARATH	Ribonuclease 1
TRINITY_DN1930_c0_g1	-3.343993308	1.74E-14	DOWN	-3.200332197	1.46E-13	DOWN	0.134115372	1	NC	Y5596_ARATH	Probable LRR receptor-like serine/threonine-protein kinase At5g59680
TRINITY_DN3449_c0_g2	0.994624842	0.036558008	NC	1.09831933	0.017443652	UP	0.094105331	1	NC	VIP2_NICBE	Probable NOT transcription complex subunit VIP2
TRINITY_DN3637_c0_g1	11.50787304	5.30E-35	UP	11.53610995	1.27E-35	UP	-0.015854609	1	NC	RL182_ARATH	60S ribosomal protein L18-2
TRINITY_DN4744_c0_g1	2.193200385	2.14E-07	UP	1.145724342	0.01114364	UP	-1.057442806	0.04289493	DOWN	RGA2_SOLBU	Disease resistance protein RGA2
TRINITY_DN2334_c0_g1	-2.712992796	5.79E-10	DOWN	-1.909248277	1.03E-05	DOWN	0.794710788	0.269276129	NC	UFOG6_FRAAN	UDP-glucose flavonoid 3-O-glucosyltransferase 6 {ECO:0000303|PubMed:18487633}
TRINITY_DN13776_c2_g1	2.301899763	2.56E-07	UP	2.229483239	5.82E-07	UP	-0.082485689	1	NC	BZP43_ARATH	Basic leucine zipper 43
TRINITY_DN14503_c0_g1	-0.694632005	0.208167609	NC	-1.10223503	0.020718853	DOWN	-0.418999611	0.944530152	NC	POLX_TOBAC	Retrovirus-related Pol polyprotein from transposon TNT 1-94
TRINITY_DN3314_c0_g1	-1.115073739	0.017172728	DOWN	-1.491452057	0.00083512	DOWN	-0.386118338	0.9961354	NC
TRINITY_DN1692_c7_g1	3.625725469	3.20E-14	UP	2.391983933	6.92E-07	NC	-1.244213432	0.01334086	DOWN	ERF34_ARATH	Ethylene-responsive transcription factor ERF034
TRINITY_DN13923_c0_g1	0.283584352	0.638544167	NC	1.94888764	6.49E-06	UP	1.655074959	0.000397607	UP
TRINITY_DN6502_c0_g1	11.10945934	8.70E-32	UP	0	1	NC	-7.711136883	3.36E-36	DOWN	WIF1_XENLA	Wnt inhibitory factor 1
TRINITY_DN8713_c2_g4	1.004648856	0.029019142	UP	0.694576075	0.174322342	NC	-0.319498344	1	NC	STAR7_MOUSE	StAR-related lipid transfer protein 7, mitochondrial
TRINITY_DN6845_c0_g2	8.82757114	1.23E-16	NC	11.8425932	3.75E-38	UP	2.971714427	1.57E-11	UP	RS10_SPOFR	40S ribosomal protein S10
TRINITY_DN7575_c0_g1	-1.07573675	0.018003476	DOWN	-0.694461097	0.175340554	NC	0.371667545	0.99759309	NC	Y1322_ARATH	C2 domain-containing protein At1g63220
TRINITY_DN9899_c0_g1	2.212875003	3.04E-06	NC	2.444131837	1.67E-07	UP	0.221389951	1	NC
TRINITY_DN1544_c3_g1	3.044685553	2.11E-12	UP	3.09837134	7.72E-13	UP	0.044080347	1	NC	ENT8_ARATH	Equilibrative nucleotide transporter 8
TRINITY_DN10210_c0_g1	-0.681039134	0.196759859	NC	-1.129759101	0.01342122	DOWN	-0.458260086	0.842341148	NC
TRINITY_DN12148_c0_g1	-1.013396798	0.031526694	DOWN	-1.158692515	0.01108987	DOWN	-0.153853577	1	NC	POL3_DROME	Retrovirus-related Pol polyprotein from transposon 17.6
TRINITY_DN4458_c0_g1	1.494105812	0.000504259	UP	1.102912096	0.0139979	UP	-0.400687432	0.944867808	NC
TRINITY_DN4432_c1_g1	-0.562546918	0.342811711	NC	-1.912498044	1.81E-05	DOWN	-1.362127953	0.006248568	NC
TRINITY_DN147_c4_g1	-1.448780353	0.001034231	DOWN	-3.508098874	3.34E-15	DOWN	-2.069803992	6.39E-06	DOWN
TRINITY_DN5740_c0_g1	5.300238716	2.83E-18	UP	5.6948085	3.28E-21	UP	0.383685813	0.992044181	NC	MYB86_ARATH	Transcription factor MYB86
TRINITY_DN13754_c0_g1	-3.444583595	2.92E-14	DOWN	-2.332764815	7.87E-08	DOWN	1.103616733	0.061822626	NC	ACCD_SOYBN	Acetyl-coenzyme A carboxylase carboxyl transferase subunit beta, chloroplastic {ECO:0000255|HAMAP-Rule:MF_01395}
TRINITY_DN3084_c1_g1	3.05184969	5.13E-11	UP	3.131013084	1.42E-11	UP	0.069079172	1	NC	Y4374_ARATH	Probable inactive receptor kinase At4g23740
TRINITY_DN9897_c0_g1	0.4414684	0.421469593	NC	2.165413297	6.14E-07	UP	1.714700934	0.000264343	UP
TRINITY_DN123049_c0_g1	0	1	NC	11.80457165	7.63E-38	UP	12.17924028	7.50E-46	UP	ASL1_SCHPO	Alkali-sensitive linkage protein 1
TRINITY_DN15618_c0_g1	1.777601096	2.94E-05	UP	1.970617013	3.03E-06	UP	0.183547449	1	NC	H4_SOYBN	Histone H4
TRINITY_DN8565_c0_g1	1.321702235	0.002510362	UP	1.624581815	0.000135721	UP	0.29356813	1	NC	CIPK6_ARATH	CBL-interacting serine/threonine-protein kinase 6
TRINITY_DN777_c6_g1	1.248376524	0.00541053	UP	0.843970023	0.085499182	NC	-0.413565799	0.928836486	NC	R13L1_ARATH	Putative disease resistance RPP13-like protein 1
TRINITY_DN253_c0_g1	1.63892727	0.000419486	UP	2.19742398	1.02E-06	UP	0.548813514	0.661993408	NC	NAC42_ARATH	Transcription factor JUNGBRUNNEN 1
TRINITY_DN10696_c0_g1	1.321023542	0.003107559	UP	0.031968757	0.970216551	NC	-1.299023105	0.007586855	DOWN
TRINITY_DN11360_c0_g1	-2.790063764	3.59E-10	DOWN	-2.512048851	1.17E-08	DOWN	0.269004676	1	NC	ATL6_ARATH	E3 ubiquitin-protein ligase ATL6
TRINITY_DN4470_c0_g3	1.959281395	3.72E-06	UP	1.933144337	4.86E-06	UP	-0.036547353	1	NC
TRINITY_DN10845_c0_g2	2.034279119	1.61E-06	UP	0.227978078	0.765284528	NC	-1.815628469	3.91E-05	DOWN	Y1571_ARATH	Probable leucine-rich repeat receptor-like protein kinase At1g35710
TRINITY_DN141_c0_g2	-1.053483123	0.021378562	DOWN	-0.975367913	0.035560651	NC	0.068703187	1	NC	AB15G_ARATH	ABC transporter G family member 15
TRINITY_DN2524_c0_g2	0.565561793	0.308080304	NC	2.02935943	1.79E-06	UP	1.453360107	0.001766845	UP
TRINITY_DN2801_c1_g1	1.366208131	0.002964263	UP	0.67906149	0.224214829	NC	-0.696920163	0.375469126	NC
TRINITY_DN3860_c0_g2	1.827407821	3.98E-05	UP	1.726098633	0.000111366	UP	-0.110883403	1	NC	PYRG1_DANRE	CTP synthase 1 {ECO:0000305}
TRINITY_DN4387_c0_g1	-1.407974923	0.001362828	DOWN	-0.940255889	0.04642462	NC	0.45753092	0.842003415	NC
TRINITY_DN5382_c3_g1	1.614735853	0.000149013	UP	1.618534169	0.000138864	UP	-0.005555211	1	NC
TRINITY_DN19524_c1_g1	0	1	NC	10.33531212	5.52E-26	UP	6.765573319	3.93E-28	UP	LEUC_RHIPU	3-isopropylmalate dehydratase
TRINITY_DN72698_c1_g2	-2.008331406	1.74E-06	DOWN	-2.130537818	3.53E-07	DOWN	-0.131597715	1	NC
TRINITY_DN7731_c0_g1	0.244186822	0.758349382	NC	2.202004387	4.57E-07	UP	1.948508197	1.37E-05	UP	BAP2_ARATH	BON1-associated protein 2
TRINITY_DN9455_c0_g1	-2.758230401	2.09E-10	DOWN	-1.655106786	0.000137428	DOWN	1.093674385	0.044114607	UP
TRINITY_DN15199_c0_g2	-10.59939609	1.01E-31	DOWN	-4.098108815	1.37E-17	DOWN	6.904532841	2.72E-08	NC
TRINITY_DN3357_c1_g3	1.789820926	4.53E-05	UP	1.715632879	9.55E-05	UP	-0.083853036	1	NC	TBB3_ARATH	Tubulin beta-3 chain
TRINITY_DN1093_c0_g1	1.405108421	0.001163188	UP	1.341662883	0.002008939	UP	-0.072938216	1	NC	C71DA_SOYBN	Cytochrome P450 71D10
TRINITY_DN2655_c0_g1	-1.097048836	0.019544729	DOWN	0.008596107	0.993682923	NC	1.096045087	0.037929927	UP	ESYT1_HUMAN	Extended synaptotagmin-1
TRINITY_DN20658_c0_g1	-0.947089399	0.090993569	NC	0.721311396	0.146803984	NC	1.660587331	0.000513404	UP
TRINITY_DN5889_c0_g3	0.756867977	0.147523621	NC	1.610016552	0.000246919	UP	0.843928789	0.17343599	NC
TRINITY_DN4758_c0_g1	2.445372816	6.81E-09	UP	0.492932201	0.398879256	NC	-1.96220841	6.82E-06	DOWN	Y4885_ARATH	Probable LRR receptor-like serine/threonine-protein kinase At4g08850
TRINITY_DN7342_c0_g1	0.437226223	0.504542651	NC	-1.532110736	0.000857542	NC	-1.980131732	1.44E-05	DOWN
TRINITY_DN3750_c1_g1	-0.941820636	0.047230457	NC	-1.034829817	0.025178593	DOWN	-0.102567908	1	NC	Y3725_ARATH	GTP-binding protein At3g49725, chloroplastic
TRINITY_DN472_c0_g1	0.945685374	0.04444796	NC	1.092773233	0.015830453	UP	0.137520002	1	NC	HYBA1_BIFL2	Non-reducing end beta-L-arabinofuranosidase
TRINITY_DN997_c0_g3	5.055130152	9.90E-28	UP	4.376032643	1.78E-22	UP	-0.688468608	0.365513824	NC
TRINITY_DN10190_c0_g1	-1.887982554	2.50E-05	DOWN	-2.554396765	1.25E-08	DOWN	-0.678968228	0.490838377	NC
TRINITY_DN5148_c0_g1	-2.753054932	2.96E-09	NC	1.514298795	0.000542838	UP	4.259305105	6.29E-20	UP
TRINITY_DN31785_c0_g1	8.823287719	1.23E-16	NC	10.88349798	2.60E-30	UP	2.016180813	7.06E-06	UP	RL44_CANTR	60S ribosomal protein L44
TRINITY_DN9234_c0_g1	8.896801684	3.06E-16	NC	11.42759876	9.76E-35	UP	2.487922305	1.82E-08	UP	FDH_EMENI	Probable formate dehydrogenase
TRINITY_DN17214_c0_g1	1.212942457	0.0120959	UP	1.014698228	0.044112198	NC	-0.207902407	1	NC	PFPA_RICCO	Pyrophosphate--fructose 6-phosphate 1-phosphotransferase subunit alpha {ECO:0000255|HAMAP-Rule:MF_03185}
TRINITY_DN3861_c0_g1	1.484258179	0.000829884	UP	1.327802269	0.003196337	UP	-0.165727452	1	NC	MCM9_ARATH	Probable DNA helicase MCM9
TRINITY_DN2895_c0_g1	-1.835788518	1.36E-05	DOWN	-2.227303613	1.02E-07	DOWN	-0.400934169	0.944867808	NC	CER3_ARATH	Protein ECERIFERUM 3
TRINITY_DN2689_c0_g2	10.81003181	1.84E-29	UP	0	1	NC	-11.22852616	4.45E-38	DOWN
TRINITY_DN2605_c0_g1	1.233436772	0.008189712	UP	-0.694659719	0.208021796	NC	-1.937840471	1.74E-05	DOWN	NC100_ARATH	NAC domain-containing protein 100
TRINITY_DN13178_c0_g1	-2.482262148	3.62E-09	DOWN	-2.372314217	1.55E-08	DOWN	0.100620822	1	NC
TRINITY_DN1148_c0_g1	1.961242073	3.12E-06	UP	1.402687076	0.001160714	UP	-0.567936635	0.593088458	NC	GLOB_TOBAC	Floral homeotic protein GLOBOSA
TRINITY_DN5539_c0_g1	-3.613644034	5.41E-16	DOWN	-3.09407599	1.07E-12	DOWN	0.510389518	0.814508229	NC	Y3739_ARATH	Uncharacterized membrane protein At3g27390
TRINITY_DN2331_c3_g1	-1.219242345	0.007884351	DOWN	-2.756397756	3.80E-10	DOWN	-1.547156191	0.00151287	NC
TRINITY_DN8219_c0_g1	-1.397256226	0.002232623	DOWN	-1.127309351	0.016370969	DOWN	0.26079249	1	NC
TRINITY_DN906_c0_g1	-0.030171852	0.97550136	NC	-1.570317642	0.000245025	DOWN	-1.549926477	0.000652389	DOWN
TRINITY_DN5646_c0_g1	2.615304804	2.28E-08	UP	2.433929179	2.36E-07	NC	-0.191593343	1	NC
TRINITY_DN1571_c1_g1	0.290503646	0.676518117	NC	1.160451408	0.009637989	UP	0.860503643	0.151465491	NC	XTH25_ARATH	Probable xyloglucan endotransglucosylase/hydrolase protein 25
TRINITY_DN97324_c0_g1	10.44222977	1.85E-27	UP	0	1	NC	-10.8609689	3.85E-35	DOWN
TRINITY_DN22808_c0_g1	-0.564603871	0.305164622	NC	0.862621037	0.070750297	NC	1.417893356	0.002265453	UP	U496D_ORYSJ	UPF0496 protein 4
TRINITY_DN472_c1_g3	-2.923897263	9.78E-11	DOWN	-2.906191642	9.25E-11	DOWN	0.008625124	1	NC	P5CS_SOLLC	Delta-1-pyrroline-5-carboxylate synthase
TRINITY_DN13096_c0_g1	8.115160524	3.00E-12	NC	11.5172375	1.81E-35	UP	3.358840384	7.12E-14	UP	Y1315_MYCBO	Uncharacterized protein Mb1315
TRINITY_DN24124_c0_g1	4.037161741	1.19E-15	UP	4.577034703	8.58E-20	UP	0.52995095	0.690318999	NC	UNE10_ARATH	Transcription factor UNE10
TRINITY_DN10804_c0_g1	0.905401915	0.074582729	NC	1.123592067	0.018012498	UP	0.208938765	1	NC	FB248_ARATH	F-box protein At4g35930
TRINITY_DN4375_c0_g1	1.618006264	0.000339413	UP	1.763143385	7.38E-05	UP	0.135327438	1	NC	MCA1_ARATH	Metacaspase-1
TRINITY_DN3506_c0_g3	-2.535037211	1.69E-09	DOWN	-4.134387432	6.94E-21	DOWN	-1.608982736	0.000429286	DOWN	SWET1_ARATH	Bidirectional sugar transporter SWEET1
TRINITY_DN8699_c1_g1	-1.744107462	4.46E-05	DOWN	-1.399071543	0.001309646	DOWN	0.335788795	1	NC	BPE_ARATH	Transcription factor BPE
TRINITY_DN6156_c0_g1	10.75589922	7.33E-30	UP	12.50942206	1.25E-43	UP	1.709588035	0.000140096	UP	RS7_SECCE	40S ribosomal protein S7
TRINITY_DN10636_c0_g1	0.469063822	0.428162466	NC	-1.133512478	0.014315478	DOWN	-1.614026721	0.000412626	DOWN
TRINITY_DN234_c2_g1	1.680406688	9.88E-05	UP	1.607549574	0.000201251	UP	-0.082440272	1	NC
TRINITY_DN6798_c0_g1	2.439826235	1.65E-08	UP	2.054967384	1.81E-06	UP	-0.395791742	0.969025612	NC	ISPE_SOLLC	4-diphosphocytidyl-2-C-methyl-D-erythritol kinase, chloroplastic/chromoplastic
TRINITY_DN24268_c0_g1	7.982764413	1.57E-11	NC	12.41980501	6.89E-43	UP	4.394491749	1.27E-21	UP	RL33B_YEAST	60S ribosomal protein L33-B
TRINITY_DN14406_c0_g1	1.005909336	0.044011248	UP	-0.463957779	0.488634643	NC	-1.480542166	0.002186132	DOWN
TRINITY_DN3324_c1_g1	1.822239234	3.03E-05	UP	2.018909287	3.18E-06	UP	0.186785031	1	NC	PPDEX_ARATH	DeSI-like protein At4g17486
TRINITY_DN7057_c0_g1	2.374126651	2.47E-08	UP	2.369088834	2.52E-08	UP	-0.014828643	1	NC	GAO_BARSP	Germacrene A oxidase
TRINITY_DN14446_c0_g1	10.01422665	3.31E-24	NC	12.58008524	3.48E-44	UP	2.522239801	6.29E-09	UP	RS7_NEUCR	40S ribosomal protein S7
TRINITY_DN5570_c0_g1	4.085899073	1.22E-20	UP	4.63902276	3.21E-25	UP	0.543780249	0.644307815	NC	XTH2_SOYBN	Xyloglucan endotransglucosylase/hydrolase 2 {ECO:0000250|UniProtKB:Q38857}
TRINITY_DN4361_c1_g1	-2.072638754	7.73E-07	DOWN	-2.028076489	1.27E-06	DOWN	0.035722805	1	NC
TRINITY_DN45666_c0_g1	-5.345934259	1.16E-30	DOWN	-5.341240107	6.09E-31	DOWN	-0.004679768	1	NC	HS181_ARATH	18.1 kDa class I heat shock protein
TRINITY_DN2330_c0_g1	1.390191952	0.001983141	UP	1.464122029	0.000981687	UP	0.064388847	1	NC	PGLR5_ARATH	Probable polygalacturonase At1g80170
TRINITY_DN8618_c0_g1	10.43531516	2.06E-27	UP	9.692390449	5.79E-22	NC	-0.786575183	0.253561859	NC
TRINITY_DN26282_c0_g1	1.542696428	0.000514756	UP	1.396848807	0.001871638	UP	-0.155217425	1	NC
TRINITY_DN1032_c1_g2	-1.139762311	0.016104207	DOWN	-0.829028993	0.10349213	NC	0.301073594	1	NC	Y5673_ARATH	WEB family protein At5g16730, chloroplastic
TRINITY_DN1613_c0_g2	-1.043021198	0.023244825	DOWN	0.293267142	0.67288713	NC	1.327009573	0.005256232	UP	PCS1L_ARATH	Aspartic proteinase PCS1
TRINITY_DN7036_c0_g1	-0.887027348	0.087033561	NC	1.167914057	0.012555113	UP	2.046006308	5.33E-06	UP
TRINITY_DN20271_c0_g1	-0.799732014	0.118984082	NC	-1.352747163	0.003001215	DOWN	-0.563000193	0.657742524	NC	RS174_ARATH	40S ribosomal protein S17-4
TRINITY_DN12447_c1_g1	1.633605362	0.000347364	UP	1.965318746	1.06E-05	UP	0.322300809	1	NC
TRINITY_DN240_c0_g1	1.64868924	0.000104895	UP	1.693576915	6.30E-05	UP	0.03567433	1	NC	PIP24_MAIZE	Aquaporin PIP2-4
TRINITY_DN5118_c0_g1	-1.171826938	0.009127777	DOWN	-0.562247376	0.309159682	NC	0.599951042	0.537535179	NC	BH025_ARATH	Transcription factor bHLH25
TRINITY_DN211_c2_g1	1.621965082	0.000371876	UP	2.015028996	5.78E-06	UP	0.383706115	0.988494636	NC	BCP_PEA	Blue copper protein
TRINITY_DN3080_c8_g1	1.429313937	0.000958173	UP	1.195069659	0.007036569	UP	-0.243802128	1	NC
TRINITY_DN5303_c0_g1	3.95781173	6.36E-18	UP	5.09084234	4.95E-27	UP	1.123771973	0.02633781	UP
TRINITY_DN9241_c0_g1	-1.505210795	0.000465114	DOWN	-1.741381345	3.91E-05	DOWN	-0.245429165	1	NC
TRINITY_DN8977_c0_g1	1.981558722	9.92E-06	UP	1.939101336	1.51E-05	UP	-0.051948202	1	NC
TRINITY_DN90921_c0_g1	-1.698563708	0.000174812	DOWN	-2.246324788	5.68E-07	DOWN	-0.557158137	0.749060751	NC	ABRA_ABRPR	Abrin-a
TRINITY_DN10275_c0_g2	0.851744059	0.080582188	NC	1.024937111	0.026451739	UP	0.163640068	1	NC	ARP8_ARATH	Actin-related protein 8
TRINITY_DN4887_c0_g1	9.956224616	9.03E-24	NC	13.39343099	7.46E-51	UP	3.393637149	8.20E-15	UP
TRINITY_DN9456_c0_g1	2.019535712	7.69E-06	UP	1.332624287	0.00548203	NC	-0.697053709	0.373896067	NC
TRINITY_DN3709_c0_g1	-2.776492206	1.31E-10	DOWN	-1.578435441	0.000276029	DOWN	1.188670911	0.021496151	UP	HAP2_ARATH	Protein HAPLESS 2
TRINITY_DN5713_c1_g2	0.199500742	0.862166654	NC	2.571948534	3.44E-08	UP	2.365223046	1.64E-07	UP
TRINITY_DN4611_c0_g1	2.429265091	8.03E-09	UP	3.112548794	2.27E-13	UP	0.67391284	0.388954315	NC	PIP25_MAIZE	Aquaporin PIP2-5
TRINITY_DN5452_c0_g1	0.847077486	0.103053529	NC	1.453371951	0.00141754	UP	0.596398896	0.563971965	NC	RTL3_ORYSJ	Ribonuclease 3-like protein 3
TRINITY_DN138486_c0_g1	2.30939182	5.91E-08	UP	2.193746644	2.54E-07	UP	-0.12506943	1	NC	LRKS4_ARATH	L-type lectin-domain containing receptor kinase S.4
TRINITY_DN690_c2_g1	-1.637422229	0.000238125	DOWN	-1.615749733	0.000280824	DOWN	0.014215073	1	NC
TRINITY_DN351_c0_g1	1.280290202	0.00362011	UP	0.854226998	0.074917859	NC	-0.435507342	0.87519717	NC	FK164_ARATH	Peptidyl-prolyl cis-trans isomerase FKBP16-4, chloroplastic
TRINITY_DN4061_c0_g1	1.664095792	9.97E-05	UP	1.321984805	0.002576204	UP	-0.351347584	1	NC	TL19_ARATH	Thylakoid lumenal 19 kDa protein, chloroplastic
TRINITY_DN7115_c0_g1	-2.609155588	1.27E-09	DOWN	-0.658815316	0.212254919	NC	1.941493411	1.41E-05	UP	WUS_ANTMA	Protein WUSCHEL
TRINITY_DN21379_c0_g1	-2.304873089	3.69E-08	DOWN	-2.585804808	6.62E-10	DOWN	-0.290163566	1	NC
TRINITY_DN14226_c0_g1	0	1	NC	10.33109727	5.85E-26	UP	9.799402445	1.58E-32	UP	PSTA_DICDI	Prestalk protein
TRINITY_DN2222_c1_g2	-1.296611478	0.004385839	DOWN	-1.493243107	0.000830524	DOWN	-0.206064458	1	NC
TRINITY_DN6593_c0_g1	1.525936932	0.001062266	UP	1.660061756	0.000298857	UP	0.12454758	1	NC	ATHB8_ARATH	Homeobox-leucine zipper protein ATHB-8
TRINITY_DN507_c1_g1	1.617331788	0.000147838	UP	1.500234633	0.000463834	UP	-0.126620828	1	NC	GAUT6_ARATH	Probable galacturonosyltransferase 6
TRINITY_DN85781_c1_g1	2.44702415	4.81E-09	UP	3.654594589	1.88E-17	UP	1.197984461	0.015258593	UP	CB22_PINSY	Chlorophyll a-b binding protein type 2 member 2
TRINITY_DN3667_c1_g1	-1.123450718	0.012607077	DOWN	-0.48729944	0.398879256	NC	0.626646114	0.48008984	NC
TRINITY_DN887_c5_g1	1.276903631	0.004638311	UP	1.410310824	0.001469495	UP	0.123023094	1	NC
TRINITY_DN1375_c5_g1	2.356149845	1.12E-07	UP	2.164878383	1.14E-06	UP	-0.201109218	1	NC
TRINITY_DN7052_c1_g1	1.440202118	0.002382135	NC	1.674521735	0.000279445	UP	0.224936707	1	NC
TRINITY_DN4859_c0_g1	1.9255674	8.13E-06	UP	2.505896382	4.60E-09	UP	0.570480419	0.595439368	NC	CCD32_ARATH	Cyclin-D3-2
TRINITY_DN4774_c0_g1	1.961164172	2.18E-05	UP	1.097742781	0.034588662	NC	-0.873599631	0.163321291	NC	ATK4_ARATH	Kinesin-4
TRINITY_DN9398_c0_g2	2.155225202	5.50E-06	NC	3.152104319	1.31E-11	UP	0.986938881	0.085908219	NC	C7A12_PANGI	Cytochrome P450 CYP736A12
TRINITY_DN9331_c0_g2	0	1	NC	12.075675	4.41E-40	UP	4.655874029	3.87E-23	UP	RL16_NEUCR	60S ribosomal protein L16
TRINITY_DN10443_c0_g1	-2.875535326	9.15E-11	DOWN	-3.423616729	3.35E-14	DOWN	-0.557378792	0.747943457	NC
TRINITY_DN17693_c0_g1	10.92439731	2.52E-30	UP	13.3918629	7.46E-51	UP	2.423416951	1.86E-08	UP	ADT_NEUCR	ADP,ATP carrier protein
TRINITY_DN6649_c0_g3	-0.058023718	0.953340946	NC	-1.154348793	0.01507954	NC	-1.104582863	0.042071049	DOWN
TRINITY_DN6696_c0_g1	1.19572138	0.007086227	UP	0.398724184	0.519747753	NC	-0.806278815	0.201812021	NC	C3H49_ARATH	Zinc finger CCCH domain-containing protein 49
TRINITY_DN1095_c0_g2	-1.044780999	0.022899547	DOWN	-2.052306136	1.23E-06	DOWN	-1.016994991	0.05981544	NC
TRINITY_DN31387_c0_g1	2.737395727	3.39E-10	UP	1.785052094	5.60E-05	UP	-0.962082826	0.084121195	NC	Y4885_ARATH	Probable LRR receptor-like serine/threonine-protein kinase At4g08850
TRINITY_DN1989_c1_g1	1.836131325	3.91E-05	UP	2.143791477	1.14E-06	UP	0.297925721	1	NC	GGLO_PIG	L-gulonolactone oxidase
TRINITY_DN2493_c0_g2	1.479329421	0.000773396	UP	1.472775377	0.000799278	UP	-0.016013232	1	NC	ATOX1_ARATH	Copper transport protein ATX1
TRINITY_DN2465_c0_g1	-2.740201207	7.96E-11	DOWN	-2.989023131	1.49E-12	DOWN	-0.258228882	1	NC
TRINITY_DN469_c2_g1	-0.345765477	0.605721395	NC	1.693463908	7.96E-05	UP	2.029809574	3.34E-06	UP
TRINITY_DN115553_c0_g1	0	1	NC	13.95304214	1.24E-55	UP	9.009958531	1.39E-53	UP	LAV1_PHYPO	Plasmodial-specific protein LAV1-2
TRINITY_DN1101_c0_g7	12.26372879	3.21E-41	UP	14.13944442	2.95E-57	UP	1.832113052	3.14E-05	UP	UBIQP_STRPU	Polyubiquitin
TRINITY_DN15774_c0_g1	-5.801153287	3.58E-32	DOWN	-6.145580475	5.61E-35	DOWN	-0.353643977	1	NC	CAL_BRARR	Transcription factor CAULIFLOWER
TRINITY_DN6703_c1_g1	1.221714164	0.006088257	UP	1.036456387	0.023777427	UP	-0.194603387	1	NC	LPP3_ARATH	Putative lipid phosphate phosphatase 3, chloroplastic
TRINITY_DN412_c1_g2	1.59235985	0.000225796	UP	1.5139726	0.000473482	UP	-0.087680161	1	NC	CXE18_ARATH	Probable carboxylesterase 18
TRINITY_DN238_c1_g2	-4.209506388	1.32E-21	DOWN	-3.674001221	1.42E-17	DOWN	0.52612979	0.686571787	NC	XTH32_ARATH	Probable xyloglucan endotransglucosylase/hydrolase protein 32
TRINITY_DN3209_c1_g4	0.972928399	0.04306535	NC	1.163607155	0.011173562	UP	0.181063401	1	NC	GTL1_ARATH	Trihelix transcription factor GTL1
TRINITY_DN13714_c0_g2	-1.772343303	7.52E-05	DOWN	-0.879444716	0.077978035	NC	0.883771752	0.169076167	NC
TRINITY_DN2970_c0_g1	1.904894318	6.09E-06	UP	2.355524566	1.81E-08	UP	0.441013318	0.860748496	NC
TRINITY_DN8151_c0_g2	1.461393438	0.00073774	UP	1.100249665	0.014894009	UP	-0.371210214	0.997207757	NC	R13L1_ARATH	Putative disease resistance RPP13-like protein 1
TRINITY_DN2645_c0_g1	1.050494786	0.02749041	UP	0.258336238	0.738957837	NC	-0.801810918	0.225231535	NC
TRINITY_DN949_c0_g1	-1.272118082	0.003905431	DOWN	-1.279584162	0.003573301	DOWN	-0.016921715	1	NC	POT12_ARATH	Putative potassium transporter 12
TRINITY_DN477_c0_g1	1.474838217	0.000641078	UP	1.327580844	0.002382847	UP	-0.156759129	1	NC	CHLH_ARATH	Magnesium-chelatase subunit ChlH, chloroplastic
TRINITY_DN3876_c1_g3	0.846221071	0.086094029	NC	1.397600186	0.001492124	UP	0.541969988	0.657196882	NC
TRINITY_DN1755_c3_g1	0.125687059	0.877444455	NC	1.318290764	0.002460794	UP	1.183362576	0.016435828	UP
TRINITY_DN8011_c0_g2	2.508365711	8.35E-09	UP	2.22768826	3.21E-07	UP	-0.290248913	1	NC	FB121_ARATH	F-box protein At2g32560
TRINITY_DN10007_c0_g3	1.667648415	8.59E-05	UP	1.419849385	0.000981788	UP	-0.257218976	1	NC	CB13_SOLLC	Chlorophyll a-b binding protein 8, chloroplastic
TRINITY_DN418_c2_g2	-0.917521508	0.060862298	NC	-1.152995335	0.012711849	DOWN	-0.244469871	1	NC
TRINITY_DN6872_c1_g4	0	1	NC	10.78653723	1.61E-29	UP	11.1615696	1.49E-37	UP	RL12_NEUCR	60S ribosomal protein L12
TRINITY_DN379_c0_g2	0.318850531	0.630935715	NC	1.222250106	0.005535769	UP	0.894280181	0.12158775	NC
TRINITY_DN23330_c2_g1	2.467506936	9.01E-09	UP	3.088073872	7.70E-13	UP	0.610857314	0.511066055	NC	ENL1_ARATH	Early nodulin-like protein 1
TRINITY_DN3953_c5_g1	-1.94063136	3.90E-06	DOWN	-1.643106703	0.000106706	DOWN	0.288262979	1	NC	H2A2_ARATH	Probable histone H2A.2
TRINITY_DN8545_c0_g1	1.165656342	0.010234058	UP	1.002352841	0.031824692	UP	-0.173242489	1	NC	DRL21_ARATH	Putative disease resistance protein At3g14460
TRINITY_DN4176_c0_g1	1.021306473	0.02684094	UP	1.146109848	0.010695468	UP	0.115284144	1	NC
TRINITY_DN917_c0_g1	0.810023586	0.12324516	NC	1.030810704	0.034527024	UP	0.211439423	1	NC	Y1301_ARATH	BTB/POZ domain-containing protein At1g03010
TRINITY_DN272_c0_g1	1.23654303	0.005146946	UP	1.320628591	0.002471827	UP	0.074540572	1	NC	NC100_ARATH	NAC domain-containing protein 100
TRINITY_DN20018_c0_g1	-0.425413824	0.486739995	NC	-1.091029324	0.016253227	DOWN	-0.674829526	0.396133357	NC	LKHA4_ARATH	Leukotriene A-4 hydrolase homolog
TRINITY_DN188_c0_g5	-1.971548731	2.87E-06	DOWN	-1.089642753	0.015566906	DOWN	0.872212712	0.14132656	NC
TRINITY_DN17680_c0_g1	-0.649070538	0.216390817	NC	-1.166281425	0.008979096	DOWN	-0.526639459	0.686052892	NC	GDL90_ARATH	GDSL esterase/lipase At5g42170
TRINITY_DN53576_c0_g1	1.692438458	0.00013148	NC	5.493676812	1.15E-30	UP	3.790343345	1.69E-17	UP	CB21_LEMGI	Chlorophyll a-b binding protein of LHCII type I, chloroplastic
TRINITY_DN4402_c1_g1	-1.378254104	0.00148359	DOWN	-1.358487318	0.001721866	DOWN	0.010478308	1	NC	LTPG1_ARATH	Non-specific lipid transfer protein GPI-anchored 1
TRINITY_DN2760_c0_g1	-2.332083945	2.59E-08	DOWN	-2.624454668	3.85E-10	DOWN	-0.301903946	1	NC	OP162_ARATH	Outer envelope pore protein 16-2, chloroplastic
TRINITY_DN442_c3_g1	-1.809496608	2.98E-05	DOWN	-1.531760008	0.000456067	DOWN	0.268441522	1	NC	ATL4_ARATH	E3 ubiquitin-protein ligase ATL4
TRINITY_DN16304_c1_g1	1.094235624	0.016182626	UP	1.450535258	0.000809017	UP	0.346495909	1	NC	MD15A_ARATH	Mediator of RNA polymerase II transcription subunit 15a
TRINITY_DN138461_c0_g1	0.703137313	0.18354097	NC	1.035890631	0.026539489	UP	0.323857946	1	NC
TRINITY_DN29658_c0_g1	1.503768993	0.000459084	UP	2.350176493	1.93E-08	UP	0.83623123	0.17031567	NC	CB23_TOBAC	Chlorophyll a-b binding protein 36, chloroplastic
TRINITY_DN11986_c1_g2	-1.639237081	0.000221773	DOWN	-0.884659139	0.072187665	NC	0.745211244	0.325334697	NC
TRINITY_DN3927_c0_g1	1.121315359	0.013157862	UP	0.631380235	0.235596108	NC	-0.499424306	0.745248687	NC	HIP26_ARATH	Heavy metal-associated isoprenylated plant protein 26
TRINITY_DN70_c5_g1	2.444305553	3.24E-08	UP	2.206308293	6.45E-07	UP	-0.247853125	1	NC	HT1_ARATH	Serine/threonine-protein kinase HT1
TRINITY_DN5541_c0_g1	-1.698739264	8.16E-05	DOWN	-1.126231644	0.012978861	DOWN	0.563345586	0.622785029	NC	HSL1_ARATH	Receptor-like protein kinase HSL1
TRINITY_DN1297_c0_g2	1.150604729	0.010432267	UP	0.821384542	0.090989571	NC	-0.338648583	1	NC	GUN6_ARATH	Endoglucanase 6
TRINITY_DN4396_c0_g1	12.64866329	1.91E-44	UP	0	1	NC	-13.06754952	2.18E-53	DOWN
TRINITY_DN145941_c0_g1	0	1	NC	10.78820181	1.61E-29	UP	8.746350149	4.26E-35	UP	RAP1_CAEEL	Ras-related protein Rap-1
TRINITY_DN2874_c0_g1	1.56330551	0.000512155	UP	0.769817718	0.148166188	NC	-0.803099033	0.221938511	NC	PGLR4_ARATH	Polygalacturonase At1g48100
TRINITY_DN24561_c0_g2	5.325901538	3.63E-29	UP	3.921060178	3.19E-18	UP	-1.414495825	0.002343258	DOWN	CAHX_FLABI	Carbonic anhydrase
TRINITY_DN13776_c0_g1	0.992825249	0.045092077	NC	1.387182771	0.002486304	UP	0.38483249	0.986679511	NC	BZP43_ARATH	Basic leucine zipper 43
TRINITY_DN12474_c1_g1	12.08833166	9.02E-40	UP	10.32194602	6.93E-26	UP	-1.810188034	5.03E-05	DOWN	ADT_SCHPO	ADP,ATP carrier protein
TRINITY_DN7856_c0_g1	-1.819346231	3.93E-05	DOWN	0.150694706	0.856205178	NC	1.961343458	1.41E-05	UP	SIB1_ARATH	Sigma factor binding protein 1, chloroplastic
TRINITY_DN14796_c0_g1	-1.239439217	0.007897716	DOWN	-2.522268425	2.17E-08	DOWN	-1.292083187	0.016302852	NC
TRINITY_DN20484_c0_g2	-14.8786379	9.75E-68	DOWN	-7.843317405	1.03E-48	DOWN	7.444066191	5.26E-11	NC
TRINITY_DN3692_c0_g1	1.082300392	0.016507183	UP	0.587719872	0.274596728	NC	-0.504069137	0.730562562	NC	CATA_SOLAP	Catalase
TRINITY_DN859_c0_g1	1.389687273	0.001624781	UP	1.268595886	0.004437928	UP	-0.130887734	1	NC	AGAL_ORYSJ	Alpha-galactosidase
TRINITY_DN6554_c0_g2	2.109955371	1.62E-06	UP	2.154775432	8.83E-07	UP	0.03538319	1	NC	PUB8_ARATH	U-box domain-containing protein 8
TRINITY_DN5934_c1_g1	2.945219433	2.03E-10	UP	2.415920841	1.99E-07	NC	-0.539632004	0.681462322	NC
TRINITY_DN4893_c1_g1	-1.215797354	0.005947661	DOWN	-1.131016409	0.011315809	DOWN	0.075425557	1	NC	PER72_ARATH	Peroxidase 72
TRINITY_DN10839_c0_g1	-1.606158039	0.000393483	NC	-0.140197621	0.86384648	NC	1.457178764	0.002686221	UP	RGP3_ARATH	UDP-arabinopyranose mutase 3
TRINITY_DN15182_c0_g1	0.123259889	0.917425359	NC	1.22522449	0.011849894	UP	1.094052458	0.040734775	UP	RGA4_SOLBU	Putative disease resistance protein RGA4
TRINITY_DN15778_c0_g2	-1.298560009	0.003642823	DOWN	-0.569759632	0.307609063	NC	0.719676475	0.331843001	NC
TRINITY_DN24317_c0_g1	1.489052723	0.001740797	NC	1.725396983	0.000194516	UP	0.226760521	1	NC	SYP71_ARATH	Syntaxin-71
TRINITY_DN130862_c0_g1	0	1	NC	9.616131381	1.58E-39	UP	6.822601838	1.81E-36	UP	ENDUB_DANRE	Poly(U)-specific endoribonuclease-B
TRINITY_DN6573_c0_g1	1.636366909	0.000135213	UP	1.02793595	0.025524539	UP	-0.617787804	0.49688094	NC	RGA2_SOLBU	Disease resistance protein RGA2
TRINITY_DN2621_c0_g2	0.817014021	0.108280411	NC	1.112576482	0.016928537	UP	0.286152488	1	NC	Y1491_ARATH	Uncharacterized protein At1g04910
TRINITY_DN4331_c0_g1	1.546221915	0.000821635	UP	0.914275794	0.07919646	NC	-0.64169683	0.4748442	NC	FNTA_PEA	Protein farnesyltransferase/geranylgeranyltransferase type-1 subunit alpha
TRINITY_DN9484_c0_g1	2.448770366	9.07E-08	UP	1.532634952	0.001327298	NC	-0.928247544	0.134505822	NC	CLASP_ARATH	CLIP-associated protein
TRINITY_DN30192_c0_g1	1.163931622	0.01148809	UP	0.821953882	0.101670405	NC	-0.351326969	1	NC	GPX2_ARATH	Probable glutathione peroxidase 2
TRINITY_DN12262_c1_g1	3.952380706	1.53E-18	UP	3.890993074	3.44E-18	UP	-0.07093329	1	NC	CDSP_ARATH	Thioredoxin-like protein CDSP32, chloroplastic
TRINITY_DN6146_c0_g1	1.765260769	3.42E-05	UP	1.16577048	0.009407627	UP	-0.609023958	0.5124782	NC
TRINITY_DN3411_c1_g1	0.731909635	0.150717678	NC	1.059327545	0.020498993	UP	0.318063582	1	NC	IKU2_ARATH	Receptor-like protein kinase HAIKU2
TRINITY_DN2553_c0_g4	0.310317722	0.654143376	NC	1.162216647	0.010122955	UP	0.842529314	0.169935192	NC	NU2M_OENBE	NADH-ubiquinone oxidoreductase chain 2
TRINITY_DN13446_c1_g3	-0.585457185	0.315183314	NC	0.621105722	0.263467863	NC	1.197799207	0.019200739	UP
TRINITY_DN14527_c1_g1	-2.272630022	2.33E-07	DOWN	-1.122776265	0.015802735	DOWN	1.141157606	0.035830845	NC	AFP3_ARATH	Ninja-family protein AFP3
TRINITY_DN130462_c0_g1	0.361082139	0.576850681	NC	-0.761285429	0.129481512	NC	-1.131747737	0.025658169	DOWN	RHA2A_ARATH	E3 ubiquitin-protein ligase RHA2A
TRINITY_DN7188_c0_g1	-0.985075454	0.038581229	NC	-2.365583411	5.26E-08	DOWN	-1.389487259	0.004573997	DOWN	AGL21_ARATH	Agamous-like MADS-box protein AGL21
TRINITY_DN6845_c0_g1	10.39955161	3.94E-27	UP	0	1	NC	-10.818094	8.51E-35	DOWN	RS10_HUMAN	40S ribosomal protein S10
TRINITY_DN6893_c0_g4	0	1	NC	10.6986948	8.27E-29	UP	11.07340829	7.58E-37	UP
TRINITY_DN2763_c3_g1	4.541228401	3.91E-17	UP	5.063007479	4.32E-21	UP	0.511607534	0.739067222	NC	GDL78_ARATH	GDSL esterase/lipase At5g22810
TRINITY_DN836_c1_g1	2.155741857	4.26E-07	UP	2.328608565	4.19E-08	UP	0.163412158	1	NC
TRINITY_DN2091_c0_g1	-1.604375637	0.000286278	DOWN	-1.878656885	1.68E-05	DOWN	-0.283948828	1	NC	KC1D_ARATH	Casein kinase I isoform delta-like
TRINITY_DN2184_c0_g1	1.035430117	0.02319657	UP	0.650096919	0.212033542	NC	-0.394882597	0.955229912	NC
TRINITY_DN1927_c0_g2	1.449559263	0.001518312	UP	1.264465336	0.00670764	UP	-0.194849548	1	NC
TRINITY_DN10032_c0_g4	-1.422387148	0.001399249	DOWN	-1.305725566	0.003593521	DOWN	0.107435991	1	NC	SUBL_ARATH	Subtilisin-like protease
TRINITY_DN339_c1_g2	-3.22935853	6.18E-14	DOWN	-2.471972169	4.71E-09	DOWN	0.748447399	0.295737855	NC
TRINITY_DN6614_c0_g1	-1.347138122	0.001992953	DOWN	-1.884537409	7.67E-06	DOWN	-0.546923112	0.641451657	NC
TRINITY_DN10746_c0_g1	1.911517848	6.44E-06	UP	1.800642369	2.22E-05	UP	-0.120576875	1	NC	CP41B_ARATH	Chloroplast stem-loop binding protein of 41 kDa b, chloroplastic
TRINITY_DN28398_c0_g1	0	1	NC	10.20215552	8.05E-26	UP	3.878736979	1.33E-15	UP
TRINITY_DN8644_c0_g1	-4.874721691	4.06E-26	DOWN	-6.066177907	2.40E-35	DOWN	-1.201317794	0.029945642	NC
TRINITY_DN4483_c0_g2	2.147019919	5.47E-07	UP	2.006101733	2.95E-06	UP	-0.150955489	1	NC	RGA2_SOLBU	Disease resistance protein RGA2
TRINITY_DN812_c0_g2	1.085979744	0.020679775	UP	1.206123861	0.008452349	UP	0.109863489	1	NC
TRINITY_DN10681_c0_g1	0	1	NC	10.60618686	4.46E-28	UP	10.9810331	4.38E-36	UP	RS6_DEBHA	40S ribosomal protein S6
TRINITY_DN10491_c0_g1	-4.867724908	2.38E-23	DOWN	-3.198778207	5.31E-13	DOWN	1.662041661	0.002623947	NC
TRINITY_DN6451_c0_g1	0.811413513	0.10892459	NC	1.441608155	0.001162892	UP	0.620468437	0.50414673	NC
TRINITY_DN31983_c0_g1	2.690065125	7.76E-10	UP	2.925044461	2.11E-11	UP	0.22488242	1	NC	CRR4_ARATH	Cysteine-rich repeat secretory protein 4
TRINITY_DN2408_c0_g2	1.191220238	0.009115752	UP	0.60457954	0.274771389	NC	-0.596069923	0.549284592	NC
TRINITY_DN4337_c3_g1	1.757033048	7.81E-05	UP	1.751796695	7.82E-05	UP	-0.015143237	1	NC
TRINITY_DN3045_c1_g1	-2.005774529	1.93E-06	DOWN	-1.817425864	1.68E-05	DOWN	0.178578994	1	NC	Y5189_ARATH	Probable LRR receptor-like protein kinase At1g51890
TRINITY_DN8211_c1_g1	1.302279162	0.005340615	UP	1.477573451	0.001154534	UP	0.165760982	1	NC	ACA11_ARATH	Putative calcium-transporting ATPase 11, plasma membrane-type
TRINITY_DN84_c0_g1	2.552034774	1.31E-09	UP	1.885023279	7.87E-06	UP	-0.676209301	0.38459105	NC
TRINITY_DN767_c0_g1	-1.264396406	0.004080536	DOWN	-1.145105692	0.010366755	DOWN	0.109758111	1	NC	PSD10_HUMAN	26S proteasome non-ATPase regulatory subunit 10
TRINITY_DN3236_c0_g2	-1.279837438	0.003543064	DOWN	-0.308224163	0.648601834	NC	0.962163939	0.08036548	NC	HSP7N_ARATH	Heat shock 70 kDa protein 18
TRINITY_DN17427_c0_g1	4.379620118	3.12E-18	UP	5.59838391	6.72E-28	UP	1.208684641	0.014796707	UP	ABP20_PRUPE	Auxin-binding protein ABP20
TRINITY_DN1216_c0_g1	-1.177420154	0.008362012	DOWN	-0.75318395	0.130324472	NC	0.414766038	0.922375447	NC	HSF30_SOLPE	Heat shock factor protein HSF30
TRINITY_DN15107_c0_g1	1.057518268	0.02286172	UP	0.422662824	0.50039642	NC	-0.643839281	0.452573498	NC
TRINITY_DN421_c1_g1	2.229703386	2.18E-07	UP	2.569960674	2.03E-09	UP	0.330604093	1	NC
TRINITY_DN11227_c0_g1	2.276312238	2.30E-07	UP	3.096796984	1.67E-12	UP	0.811471783	0.201084275	NC	LTPG2_ARATH	Non-specific lipid transfer protein GPI-anchored 2
TRINITY_DN75384_c0_g1	1.373337556	0.002058944	UP	1.805996807	2.69E-05	UP	0.423477619	0.906948833	NC	WTR8_ARATH	WAT1-related protein At1g44800
TRINITY_DN3627_c0_g1	-1.298739205	0.002968013	DOWN	-1.396825938	0.0012161	DOWN	-0.107470213	1	NC	SPE2_ARATH	Arginine decarboxylase 2
TRINITY_DN2330_c1_g2	3.524176908	2.83E-16	UP	2.361263552	1.98E-08	UP	-1.172534875	0.017988871	DOWN	GATA5_ARATH	GATA transcription factor 5
TRINITY_DN7031_c0_g1	-1.138385207	0.011925469	DOWN	-0.22994059	0.758470909	NC	0.899153629	0.123029752	NC	ASOL_BRANA	L-ascorbate oxidase homolog
TRINITY_DN6001_c0_g1	2.658806096	4.21E-10	UP	3.155434248	1.77E-13	UP	0.487051589	0.7695229	NC	AKR2_ORYSJ	Probable aldo-keto reductase 2
TRINITY_DN4646_c1_g2	1.363218557	0.002946172	UP	1.238083222	0.007713009	UP	-0.135255213	1	NC	C81E1_GLYEC	Isoflavone 2'-hydroxylase
TRINITY_DN3302_c0_g3	1.12337783	0.013686684	UP	1.501592808	0.000531535	UP	0.368681383	1	NC
TRINITY_DN625_c0_g1	2.252334138	1.09E-07	UP	2.356862297	2.52E-08	UP	0.095114992	1	NC	REMO_SOLTU	Remorin
TRINITY_DN967_c0_g1	1.112614256	0.018931686	UP	1.30733473	0.004385822	UP	0.185178397	1	NC	AS1_ARATH	Transcription factor AS1
TRINITY_DN430_c0_g2	4.551558208	6.59E-21	UP	4.525457336	6.88E-21	UP	-0.03656369	1	NC	EXPB3_ARATH	Expansin-B3
TRINITY_DN8305_c0_g2	3.741821441	7.78E-13	NC	4.333597391	6.71E-17	UP	0.581922159	0.606965616	NC
TRINITY_DN9704_c0_g2	10.77267648	5.62E-30	UP	0	1	NC	-11.19144401	8.63E-38	DOWN	RL7_CAEEL	60S ribosomal protein L7
TRINITY_DN9042_c0_g1	-1.841655242	1.39E-05	DOWN	-1.959131883	3.38E-06	DOWN	-0.126883258	1	NC	YI7B_SCHPO	UPF0695 membrane protein C977.11/PB8B6.06c
TRINITY_DN6814_c0_g1	1.656099854	0.000301454	UP	-0.197654777	0.835591741	NC	-1.863963486	5.01E-05	DOWN
TRINITY_DN1172_c9_g1	-2.175812667	4.06E-07	DOWN	-2.641770889	9.13E-10	DOWN	-0.475629542	0.843247233	NC
TRINITY_DN1166_c0_g3	-1.9941406	4.62E-06	DOWN	-2.454126399	1.48E-08	DOWN	-0.4696084	0.858112254	NC	BH094_ARATH	Transcription factor bHLH94
TRINITY_DN233_c1_g1	-1.931658197	4.57E-06	DOWN	-2.112590474	4.69E-07	DOWN	-0.190138589	1	NC	SWET1_ARATH	Bidirectional sugar transporter SWEET1
TRINITY_DN5528_c1_g1	0.729339284	0.14903328	NC	1.004692705	0.02874308	UP	0.265996324	1	NC	R13L1_ARATH	Putative disease resistance RPP13-like protein 1
TRINITY_DN5815_c0_g3	11.27226245	4.23E-33	UP	9.51206402	1.23E-20	NC	-1.805742509	6.29E-05	DOWN	RL40_CRYNJ	Ubiquitin-60S ribosomal protein L40
TRINITY_DN22106_c0_g1	3.449262589	6.74E-12	UP	3.121797803	6.41E-10	NC	-0.337667715	1	NC	AMT13_SOLLC	Ammonium transporter 1 member 3
TRINITY_DN9872_c1_g1	1.084320203	0.019049727	UP	1.535018833	0.00042158	UP	0.44099947	0.869073135	NC
TRINITY_DN16453_c0_g1	1.823328066	4.81E-05	UP	2.188543747	6.84E-07	UP	0.355575607	1	NC	RGAP3_ARATH	Rho GTPase-activating protein 3
TRINITY_DN14915_c0_g1	0	1	NC	10.18617399	1.10E-25	UP	2.906883568	3.24E-10	UP	MDHM_YEAST	Malate dehydrogenase, mitochondrial
TRINITY_DN8438_c0_g1	9.48538174	2.52E-20	NC	11.22721653	4.32E-33	UP	1.698399148	0.000207717	UP	GLYC_NEUCR	Serine hydroxymethyltransferase, cytosolic
TRINITY_DN3329_c0_g1	0.442102411	0.464600662	NC	1.241099695	0.005080064	UP	0.789724554	0.222841405	NC	PATL5_ARATH	Patellin-5
TRINITY_DN9599_c1_g1	1.526784971	0.00053968	UP	1.412915433	0.001478331	UP	-0.123269793	1	NC	GUN_PAEPO	Endoglucanase
TRINITY_DN2863_c2_g1	7.815268892	1.12E-10	NC	10.69712778	8.27E-29	UP	2.838712212	3.45E-10	UP
TRINITY_DN9195_c0_g2	5.57921883	1.60E-30	UP	5.447089779	8.90E-30	UP	-0.142078048	1	NC	FLS_CITUN	Flavonol synthase/flavanone 3-hydroxylase
TRINITY_DN1208_c2_g1	-1.38415332	0.001534271	DOWN	-1.180595732	0.008183464	DOWN	0.194009858	1	NC	TPS1_ARATH	Alpha,alpha-trehalose-phosphate synthase [UDP-forming] 1
TRINITY_DN8201_c0_g1	10.1049485	6.89E-25	UP	9.536652614	8.34E-21	NC	-0.611422944	0.552253756	NC
TRINITY_DN41393_c0_g1	1.15294795	0.01196926	UP	3.137900776	2.50E-13	UP	1.975712955	5.82E-06	UP	CB24_SOLLC	Chlorophyll a-b binding protein 4, chloroplastic
TRINITY_DN6088_c0_g1	-2.592391118	1.07E-09	DOWN	-0.821639384	0.091071907	NC	1.761360621	8.29E-05	UP
TRINITY_DN1390_c0_g2	12.33313402	8.43E-42	UP	13.65752892	3.89E-53	UP	1.280387438	0.007777614	UP	CYC_NEUCR	Cytochrome c
TRINITY_DN7826_c1_g1	-0.581108447	0.305357978	NC	-1.075377374	0.022193904	DOWN	-0.503821605	0.768911382	NC
TRINITY_DN6499_c0_g1	-1.235348171	0.005989395	DOWN	-1.236154987	0.005859105	DOWN	-0.010280489	1	NC	MARF1_CHICK	Meiosis arrest female protein 1 homolog
TRINITY_DN115156_c0_g1	12.40889942	1.98E-42	UP	0	1	NC	-12.82778169	2.79E-51	DOWN
TRINITY_DN1681_c1_g1	-0.652985835	0.211402314	NC	-2.292662584	4.45E-08	DOWN	-1.649259148	0.000229839	DOWN	STAD_SOYBN	Acyl-[acyl-carrier-protein] desaturase, chloroplastic
TRINITY_DN842_c0_g2	0.79065456	0.106290861	NC	1.134948717	0.010893407	UP	0.33478976	1	NC
TRINITY_DN7442_c0_g1	10.84057151	1.10E-29	UP	11.71501772	4.21E-37	UP	0.83063687	0.186900852	NC	RS4_BOVIN	40S ribosomal protein S4
TRINITY_DN9319_c0_g1	-2.530310337	1.79E-08	DOWN	-2.344827408	1.53E-07	DOWN	0.175888195	1	NC	URT1_FRAAN	Putative UDP-rhamnose:rhamnosyltransferase 1
TRINITY_DN15008_c0_g1	9.084449871	1.82E-17	NC	10.02177391	1.88E-24	UP	0.893616444	0.153088374	NC
TRINITY_DN8793_c0_g1	0.737283048	0.162222888	NC	-1.818101695	5.21E-05	NC	-2.565973369	8.26E-09	DOWN	HST_ARATH	Shikimate O-hydroxycinnamoyltransferase
TRINITY_DN17564_c0_g1	2.474370054	2.68E-06	NC	4.117772352	2.49E-16	UP	1.633319281	0.000473732	UP	PIN3_ARATH	Auxin efflux carrier component 3
TRINITY_DN1731_c0_g1	-6.372109189	2.16E-33	DOWN	-7.768756425	1.13E-39	DOWN	0	1	NC	MYBC_MAIZE	Anthocyanin regulatory C1 protein
TRINITY_DN51107_c0_g2	1.378468439	0.001531245	UP	1.063270075	0.019021608	UP	-0.324565873	1	NC	RPE_SPIOL	Ribulose-phosphate 3-epimerase, chloroplastic
TRINITY_DN14058_c1_g1	1.231067607	0.012986198	NC	1.578442453	0.000751497	UP	0.337760649	1	NC
TRINITY_DN296_c0_g1	0.942046518	0.045425105	NC	1.267399416	0.004033654	UP	0.315677486	1	NC	ZN363_HUMAN	RING finger and CHY zinc finger domain-containing protein 1
TRINITY_DN4323_c0_g1	-1.409334308	0.001173472	DOWN	-1.432700296	0.000918723	DOWN	-0.032675697	1	NC	NEP2_NEPGR	Aspartic proteinase nepenthesin-2
TRINITY_DN460_c1_g1	-2.685640987	2.69E-10	DOWN	-2.532455365	2.12E-09	DOWN	0.144030308	1	NC	OMT1_CHRAE	Quercetin 3-O-methyltransferase 1
TRINITY_DN958_c6_g1	1.530076641	0.000794737	UP	0.549284966	0.372936012	NC	-0.99074278	0.074439561	NC
TRINITY_DN1594_c3_g1	0.981256462	0.033705604	NC	-0.439535102	0.463140227	NC	-1.430177682	0.001975436	DOWN	CIPKP_ARATH	CBL-interacting serine/threonine-protein kinase 25
TRINITY_DN15320_c0_g3	2.925927346	9.72E-12	UP	2.370998694	2.74E-08	UP	-0.56439519	0.604433559	NC	COL16_ARATH	Zinc finger protein CONSTANS-LIKE 16
TRINITY_DN1838_c1_g2	1.409734464	0.001250042	UP	1.536510579	0.000366028	UP	0.117444668	1	NC	C90C1_ARATH	3-epi-6-deoxocathasterone 23-monooxygenase
TRINITY_DN886_c0_g2	2.006943624	4.11E-06	UP	-0.185804847	0.826063557	NC	-2.202541062	5.44E-07	DOWN
TRINITY_DN14457_c0_g1	-1.171463777	0.012309689	DOWN	-1.272506993	0.005535436	DOWN	-0.110728594	1	NC	CX6B3_ARATH	Cytochrome c oxidase subunit 6b-3
TRINITY_DN2746_c0_g1	-1.06321091	0.020602705	DOWN	-1.641195818	0.000136848	DOWN	-0.58757671	0.568895172	NC	NUP58_ARATH	Nuclear pore complex protein NUP58 {ECO:0000303|PubMed:21189294}
TRINITY_DN5314_c0_g1	-0.033612384	0.983849897	NC	-3.013909372	4.32E-11	NC	-2.991868403	6.79E-11	DOWN
TRINITY_DN6744_c1_g1	-0.218333975	0.769463171	NC	0.997178118	0.029744124	NC	1.206007066	0.013799769	UP
TRINITY_DN5365_c0_g1	-1.65926288	9.86E-05	DOWN	-0.309347035	0.647515243	NC	1.34048102	0.004571273	UP
TRINITY_DN1954_c0_g3	-1.606673887	0.000281478	DOWN	-0.620931147	0.256633849	NC	0.976602583	0.088349158	NC
TRINITY_DN78301_c0_g1	-2.272558491	9.01E-08	DOWN	-0.192830493	0.804167236	NC	2.070597806	2.32E-06	UP
TRINITY_DN10043_c1_g1	-2.137321127	3.58E-07	DOWN	-2.220945182	1.15E-07	DOWN	-0.093099676	1	NC	RAV1_ARATH	AP2/ERF and B3 domain-containing transcription factor RAV1
TRINITY_DN8767_c0_g1	10.17852103	2.00E-25	UP	11.88191412	1.79E-38	UP	1.659758923	0.000263241	UP
TRINITY_DN4929_c1_g1	0.401418153	0.568163993	NC	1.190299726	0.013109136	UP	0.779760322	0.262492766	NC	ATL16_ARATH	RING-H2 finger protein ATL16
TRINITY_DN2377_c0_g1	-2.443945729	5.99E-09	DOWN	-1.513895944	0.000409622	DOWN	0.920703869	0.106066806	NC	P2C24_ARATH	Probable protein phosphatase 2C 24
TRINITY_DN8804_c2_g1	0.990456404	0.031883851	NC	1.146252254	0.010195189	UP	0.146221599	1	NC
TRINITY_DN21440_c0_g1	-1.543213264	0.000590067	DOWN	-0.962014618	0.046322289	NC	0.57239644	0.639533912	NC
TRINITY_DN1907_c6_g1	2.744385097	5.82E-10	UP	2.85944122	9.54E-11	UP	0.105428554	1	NC
TRINITY_DN13350_c0_g1	-2.423190412	3.39E-08	DOWN	-2.597491903	3.63E-09	DOWN	-0.183046584	1	NC
TRINITY_DN15091_c0_g2	0	1	NC	11.03670949	1.54E-31	UP	11.41046483	1.54E-39	UP
TRINITY_DN9340_c0_g1	6.074449458	8.14E-21	UP	6.372767298	4.62E-23	UP	0.286881071	1	NC	NAC98_ARATH	Protein CUP-SHAPED COTYLEDON 2
TRINITY_DN2889_c3_g2	-1.23612633	0.006271112	DOWN	-2.956420503	1.53E-11	DOWN	-1.729295179	0.00022881	NC	APL_ARATH	Myb family transcription factor APL
TRINITY_DN115721_c0_g1	0	1	NC	11.03130203	1.73E-31	UP	11.40569027	1.70E-39	UP
TRINITY_DN3496_c0_g1	-3.606451282	2.54E-16	DOWN	-3.146109489	2.92E-13	DOWN	0.451439476	0.890354905	NC	PSS1_ORYSJ	CDP-diacylglycerol--serine O-phosphatidyltransferase 1
TRINITY_DN112_c2_g1	-4.44499614	8.70E-20	DOWN	-10.97024858	4.14E-35	DOWN	0	1	NC
TRINITY_DN79580_c0_g1	2.158728788	4.45E-06	NC	2.821010841	7.63E-10	UP	0.652514351	0.453182021	NC
TRINITY_DN3131_c0_g2	2.557486041	7.10E-09	UP	2.836731396	1.12E-10	UP	0.269879731	1	NC	TBA_PRUDU	Tubulin alpha chain
TRINITY_DN17256_c0_g1	9.39838954	1.14E-19	NC	9.975431306	4.21E-24	UP	0.535434638	0.700856895	NC
TRINITY_DN6575_c0_g1	-1.038923277	0.022885362	DOWN	-1.077380281	0.0169653	DOWN	-0.047748518	1	NC	DIT1_ARATH	Dicarboxylate transporter 1, chloroplastic
TRINITY_DN3167_c0_g1	1.075008842	0.019091772	UP	0.816964786	0.096041158	NC	-0.267505638	1	NC
TRINITY_DN5127_c0_g1	0.312903621	0.68620842	NC	1.143525354	0.017444642	UP	0.821220893	0.217730291	NC
TRINITY_DN22328_c0_g1	0.732207286	0.169792407	NC	1.181276037	0.011251421	UP	0.439771848	0.887185289	NC
TRINITY_DN3867_c0_g1	2.016478361	1.70E-06	UP	1.757994597	3.32E-05	UP	-0.267866136	1	NC	FB76_ARATH	F-box protein At1g67340
TRINITY_DN10006_c0_g1	1.776063181	3.08E-05	UP	1.375732399	0.001658004	UP	-0.409483041	0.932160245	NC	UGPI7_ARATH	Uncharacterized GPI-anchored protein At4g28100
TRINITY_DN15892_c1_g2	0	1	NC	6.300946191	1.21E-21	UP	2.82875308	9.02E-10	UP	RLP24_DICDI	Probable ribosome biogenesis protein RLP24
TRINITY_DN4913_c0_g1	1.734036544	0.000262253	NC	1.979196285	2.12E-05	UP	0.23535327	1	NC
TRINITY_DN3399_c2_g1	-2.23158438	2.42E-07	DOWN	-1.882156318	1.42E-05	DOWN	0.339861209	1	NC	CRK2_ARATH	Cysteine-rich receptor-like protein kinase 2
TRINITY_DN2292_c0_g2	2.078140438	5.84E-06	UP	2.406585766	9.22E-08	UP	0.318698073	1	NC
TRINITY_DN603_c1_g1	0.92576187	0.051308487	NC	1.192935056	0.007569394	UP	0.257808196	1	NC	PERK1_ARATH	Proline-rich receptor-like protein kinase PERK1
TRINITY_DN45678_c0_g1	4.990513494	3.66E-10	NC	7.050556502	7.85E-24	UP	2.047492719	8.07E-06	UP	EXP15_ARATH	Expansin-A15
TRINITY_DN3384_c1_g1	0.649902366	0.260704439	NC	1.106222556	0.022777932	UP	0.447099493	0.877757287	NC	EXS_ARATH	Leucine-rich repeat receptor protein kinase EXS
TRINITY_DN8035_c0_g1	2.264668117	1.67E-07	UP	2.512882655	5.71E-09	UP	0.237554585	1	NC
TRINITY_DN8897_c0_g1	-2.485662435	1.86E-08	DOWN	-2.039497457	3.19E-06	DOWN	0.437853978	0.935758465	NC	LEA5A_GOSHI	Late embryogenesis abundant protein Lea5-A
TRINITY_DN7266_c0_g2	12.28233295	2.22E-41	UP	0	1	NC	-11.84264235	3.34E-50	DOWN	H2A1_ARATH	Probable histone H2A.1
TRINITY_DN20584_c0_g1	1.397535291	0.005956922	NC	2.376133097	3.51E-07	UP	0.969330331	0.092129122	NC
TRINITY_DN6612_c0_g1	10.7235976	1.26E-29	UP	10.23374513	4.62E-26	UP	-0.53329034	0.695698445	NC
TRINITY_DN10034_c0_g2	1.128894494	0.014016084	UP	1.276910988	0.004279915	UP	0.138090372	1	NC	UBP12_ARATH	Ubiquitin carboxyl-terminal hydrolase 12
TRINITY_DN87835_c0_g1	-1.442169789	0.000950575	DOWN	-0.92397533	0.050418329	NC	0.508892309	0.733110878	NC	MT2_ACTDE	Metallothionein-like protein type 2
TRINITY_DN4184_c0_g1	2.395988823	6.33E-08	UP	2.207067148	6.89E-07	UP	-0.198719431	1	NC
TRINITY_DN14606_c0_g1	-1.29070029	0.00370123	DOWN	-0.986877181	0.034676468	NC	0.294423417	1	NC	Y4885_ARATH	Probable LRR receptor-like serine/threonine-protein kinase At4g08850
TRINITY_DN4484_c0_g2	1.315174181	0.002592688	UP	1.528535526	0.000348779	UP	0.20391628	1	NC	Y381_RICFE	Putative ankyrin repeat protein RF_0381
TRINITY_DN5363_c0_g3	-1.848440289	1.58E-05	DOWN	-0.354629112	0.587287351	NC	1.48416755	0.001422464	UP	GSTT3_ARATH	Glutathione S-transferase T3
TRINITY_DN10097_c0_g1	0	1	NC	10.65497627	1.76E-28	UP	3.726812209	2.01E-15	UP	CF106_DANRE	Uncharacterized protein C6orf106 homolog
TRINITY_DN3317_c0_g2	0.307266777	0.656595748	NC	-1.463834499	0.001094021	DOWN	-1.782130723	8.18E-05	DOWN
TRINITY_DN6607_c0_g1	0.136901398	0.901304337	NC	1.45721227	0.001828769	UP	1.310942391	0.007850267	UP
TRINITY_DN5953_c0_g3	-3.146763538	1.87E-13	DOWN	-2.90078697	7.69E-12	DOWN	0.236515921	1	NC	P5CS2_ARATH	Delta-1-pyrroline-5-carboxylate synthase B
TRINITY_DN1950_c0_g1	3.680535049	3.19E-16	UP	3.488187967	6.78E-15	UP	-0.201923594	1	NC	TIC32_ARATH	Short-chain dehydrogenase TIC 32, chloroplastic
TRINITY_DN8568_c0_g2	-1.429755052	0.00155327	DOWN	-2.639405215	2.46E-09	DOWN	-1.221910623	0.022256153	NC
TRINITY_DN915_c0_g2	-2.188266977	1.81E-07	DOWN	-1.799960524	1.97E-05	DOWN	0.378926945	0.98523836	NC	HMDH_CAMAC	3-hydroxy-3-methylglutaryl-coenzyme A reductase
TRINITY_DN3147_c1_g2	1.867407898	1.08E-05	UP	2.222161204	1.29E-07	UP	0.34526711	1	NC	E13B_VITVI	Glucan endo-1,3-beta-glucosidase {ECO:0000250|UniProtKB:Q03467}
TRINITY_DN2008_c0_g2	1.023177071	0.025378443	UP	1.102978448	0.014038422	UP	0.070327484	1	NC	AL2B7_ARATH	Aldehyde dehydrogenase family 2 member B7, mitochondrial
TRINITY_DN10350_c0_g1	0.967011178	0.062531717	NC	1.504918611	0.001195655	UP	0.52845939	0.71471662	NC
TRINITY_DN3376_c1_g2	-1.52223495	0.000508576	DOWN	-2.950798961	9.46E-12	DOWN	-1.440404111	0.002818015	DOWN
TRINITY_DN6733_c0_g1	10.52659127	4.09E-28	UP	12.41435128	7.45E-43	UP	1.844108125	3.33E-05	UP	RS15_PODAS	40S ribosomal protein S15
TRINITY_DN112840_c0_g1	11.96027003	1.05E-38	UP	0	1	NC	-12.37913845	1.69E-47	DOWN
TRINITY_DN5339_c0_g1	-0.944749691	0.042861	NC	-1.502042865	0.000448458	DOWN	-0.566796283	0.595843989	NC	Y2766_ARATH	Uncharacterized protein At2g37660, chloroplastic
TRINITY_DN6406_c0_g2	0.289264076	0.696491492	NC	1.180386203	0.010526487	UP	0.881889055	0.142258194	NC
TRINITY_DN49054_c0_g1	-1.827491413	2.30E-05	DOWN	-1.314327107	0.003072813	DOWN	0.503838866	0.763144813	NC
TRINITY_DN3133_c0_g1	0.498147925	0.402073972	NC	1.08415359	0.018720508	UP	0.576336653	0.590161066	NC	PPA23_ARATH	Purple acid phosphatase 23
TRINITY_DN4495_c0_g2	-1.314579533	0.002607248	DOWN	-0.885081177	0.060892407	NC	0.419914888	0.909882501	NC	FKB65_ARATH	Peptidyl-prolyl cis-trans isomerase FKBP65
TRINITY_DN676_c0_g2	1.535272844	0.002712757	NC	2.722632772	8.58E-09	UP	1.177583756	0.024173822	UP
TRINITY_DN88289_c0_g1	-2.357117094	1.82E-08	DOWN	-2.731946719	7.54E-11	DOWN	-0.383936642	0.976199632	NC
TRINITY_DN4555_c0_g1	1.520503226	0.000671822	UP	1.357851541	0.002769903	UP	-0.17157951	1	NC
TRINITY_DN167_c0_g1	1.724213677	5.89E-05	UP	1.502757813	0.000532552	UP	-0.230924268	1	NC
TRINITY_DN138675_c0_g1	-1.408023496	0.001177317	DOWN	-2.010606063	1.75E-06	DOWN	-0.612365388	0.509704685	NC	MSRA_FRAAN	Peptide methionine sulfoxide reductase
TRINITY_DN5551_c0_g1	1.325141995	0.005157933	UP	0.877296123	0.096688393	NC	-0.457719722	0.861035863	NC	Y4345_ARATH	Probable receptor-like serine/threonine-protein kinase At4g34500
TRINITY_DN23285_c0_g1	0.200843714	0.803436942	NC	-2.608857857	5.78E-09	DOWN	-2.820052937	3.60E-10	DOWN
TRINITY_DN4233_c0_g1	-1.024320342	0.047101045	NC	0.859358121	0.094282104	NC	1.874985185	5.31E-05	UP	CCN2_ANTMA	G2/mitotic-specific cyclin-2
TRINITY_DN1328_c4_g1	4.516003742	8.80E-16	NC	4.741785053	2.15E-17	UP	0.215469234	1	NC	GH36_ARATH	Indole-3-acetic acid-amido synthetase GH3.6
TRINITY_DN3096_c0_g1	1.142757	0.01450212	UP	1.079254409	0.022501209	UP	-0.07305166	1	NC	DJ1C_ARATH	Protein DJ-1 homolog C
TRINITY_DN20981_c0_g1	-2.826429585	5.48E-11	DOWN	-2.599767612	1.17E-09	DOWN	0.21740507	1	NC	LBD16_ARATH	LOB domain-containing protein 16
TRINITY_DN48786_c0_g2	11.31363447	2.03E-33	UP	9.581253686	3.25E-21	NC	-1.77419534	9.04E-05	DOWN	RL40_ACACA	Ubiquitin-60S ribosomal protein L40
TRINITY_DN18451_c0_g1	-3.727274502	8.08E-17	DOWN	-4.387382433	5.63E-21	DOWN	-0.667911744	0.609231281	NC
TRINITY_DN4028_c0_g2	1.198860181	0.0104274	UP	1.276488526	0.005547632	UP	0.068096002	1	NC
TRINITY_DN13054_c0_g1	-1.280659238	0.004953455	DOWN	-0.283995242	0.691033001	NC	0.987709252	0.080676493	NC
TRINITY_DN478_c0_g6	-2.303770037	2.14E-07	DOWN	-1.371731717	0.002653619	DOWN	0.923198636	0.154955881	NC	EF114_ARATH	Ethylene-responsive transcription factor ERF114
TRINITY_DN7430_c0_g2	-0.961723253	0.041200828	NC	-2.481662118	5.78E-09	DOWN	-1.530418373	0.000990948	DOWN
TRINITY_DN673_c0_g4	0.261828598	0.730117008	NC	1.734980049	7.31E-05	UP	1.463695662	0.001792575	UP
TRINITY_DN3890_c0_g3	2.100405182	3.35E-06	UP	1.99122406	1.15E-05	UP	-0.119574879	1	NC	R13L1_ARATH	Putative disease resistance RPP13-like protein 1
TRINITY_DN2016_c1_g1	-1.611610076	0.000168707	DOWN	-1.555041953	0.000288577	DOWN	0.047016184	1	NC	KDSB_ARATH	3-deoxy-manno-octulosonate cytidylyltransferase, mitochondrial
TRINITY_DN4708_c3_g2	-1.858004566	1.12E-05	DOWN	0.410755917	0.502447133	NC	2.259412563	1.56E-07	UP	ZFP1_WHEAT	Zinc finger protein 1
TRINITY_DN7932_c0_g2	0.703596959	0.172053379	NC	1.038561235	0.023515795	UP	0.325339448	1	NC
TRINITY_DN5581_c0_g1	10.17516248	2.00E-25	NC	12.50823645	1.28E-43	UP	2.289381869	1.47E-07	UP	RS3A_NECH7	40S ribosomal protein S1 {ECO:0000255|HAMAP-Rule:MF_03122}
TRINITY_DN64671_c0_g1	10.06999424	1.25E-24	NC	11.5045708	2.25E-35	UP	1.391038273	0.003564971	UP	RSSA2_SCHJY	40S ribosomal protein S0-B {ECO:0000255|HAMAP-Rule:MF_03015}
TRINITY_DN7120_c0_g1	-1.328397928	0.002395062	DOWN	-0.921956011	0.049455368	NC	0.397203668	0.954385405	NC	MGL_ARATH	Methionine gamma-lyase
TRINITY_DN7584_c0_g1	1.116393649	0.013851185	UP	1.017224071	0.027400932	UP	-0.108707018	1	NC
TRINITY_DN6148_c0_g2	10.64793846	4.87E-29	UP	0	1	NC	-11.06664561	8.99E-37	DOWN	PITP3_DICDI	Phosphatidylinositol transfer protein 3
TRINITY_DN9121_c0_g1	0.066054091	0.942672496	NC	1.576873559	0.000266771	UP	1.501751143	0.001088615	UP
TRINITY_DN4244_c1_g4	2.366884813	2.03E-08	UP	2.624934825	4.85E-10	UP	0.248724877	1	NC
TRINITY_DN5325_c1_g1	3.485166683	1.64E-12	UP	2.304009553	6.10E-06	NC	-1.192995698	0.020701766	DOWN
TRINITY_DN109_c0_g2	-0.106692454	0.900748245	NC	-1.010414909	0.030133579	DOWN	-0.913494683	0.115074192	NC
TRINITY_DN11805_c0_g1	10.69379441	2.11E-29	UP	9.772428468	1.46E-22	NC	-0.965460089	0.091437971	NC	SYSC_SCHPO	Serine--tRNA ligase, cytoplasmic
TRINITY_DN1094_c0_g1	1.927165463	4.85E-06	UP	1.708283816	5.59E-05	UP	-0.228335031	1	NC	IDND_VITVI	L-idonate 5-dehydrogenase
TRINITY_DN7805_c0_g2	-4.446730474	3.24E-20	DOWN	-2.935675327	4.14E-11	DOWN	1.504188434	0.007883313	NC
TRINITY_DN4269_c0_g1	1.08545048	0.021917019	UP	1.36353839	0.00253512	UP	0.268728359	1	NC	MFRN_DICDI	Mitoferrin
TRINITY_DN7579_c0_g1	-0.697076468	0.249204415	NC	1.468499221	0.001533777	UP	2.157688854	2.38E-06	UP	ALA4_ARATH	Putative phospholipid-transporting ATPase 4
TRINITY_DN240_c3_g1	3.21844822	9.77E-14	UP	3.955775727	2.59E-19	UP	0.727879654	0.3035672	NC	PIP21_ARATH	Aquaporin PIP2-1
TRINITY_DN15_c2_g1	-0.488901021	0.405158915	NC	-1.482512275	0.000677444	DOWN	-1.003185231	0.066321994	NC
TRINITY_DN7974_c0_g1	1.810400322	1.97E-05	UP	1.14761784	0.010526487	UP	-0.672272184	0.393012965	NC	R13L1_ARATH	Putative disease resistance RPP13-like protein 1
TRINITY_DN13651_c0_g1	1.048870805	0.020225439	UP	1.786521984	2.51E-05	UP	0.727703086	0.316627187	NC
TRINITY_DN139315_c0_g1	-2.637256524	1.59E-09	DOWN	-1.713890796	8.31E-05	DOWN	0.915306088	0.140664785	NC	GDU5_ARATH	Protein GLUTAMINE DUMPER 5
TRINITY_DN7485_c0_g1	-1.569480267	0.000243745	DOWN	-1.570624554	0.00023298	DOWN	-0.010539358	1	NC
TRINITY_DN7130_c0_g1	-0.627410076	0.244120736	NC	-1.851217942	1.56E-05	DOWN	-1.233896855	0.012680638	DOWN
TRINITY_DN40380_c0_g5	10.47074316	1.08E-27	UP	0	1	NC	-10.88942994	2.27E-35	DOWN	GPX2_YEAST	Glutathione peroxidase 2
TRINITY_DN4511_c0_g1	1.755423377	9.12E-05	UP	1.623341977	0.000315529	UP	-0.141879935	1	NC	TMCO4_HUMAN	Transmembrane and coiled-coil domain-containing protein 4
TRINITY_DN10948_c0_g1	1.161475278	0.010738902	UP	0.496927699	0.397501376	NC	-0.674385242	0.398938122	NC
TRINITY_DN5823_c0_g2	2.71785017	5.67E-10	UP	3.207409018	2.80E-13	UP	0.48027239	0.79041681	NC	DRL21_ARATH	Putative disease resistance protein At3g14460
TRINITY_DN4785_c0_g3	1.376939615	0.001525429	UP	1.415093308	0.001044501	UP	0.028565388	1	NC	HIR2_ARATH	Hypersensitive-induced response protein 2
TRINITY_DN688_c1_g1	2.653671775	1.07E-08	UP	2.472349801	1.06E-07	UP	-0.191284443	1	NC	AP2_ARATH	Floral homeotic protein APETALA 2
TRINITY_DN5073_c0_g1	1.599932806	0.000586485	UP	1.858043748	4.43E-05	UP	0.248484111	1	NC
TRINITY_DN14207_c0_g2	0.474922393	0.42858127	NC	-0.897739037	0.069863661	NC	-1.381465825	0.004156514	DOWN	PEPR1_ARATH	Leucine-rich repeat receptor-like protein kinase PEPR1
TRINITY_DN21414_c0_g1	0.900492615	0.073192241	NC	1.24582463	0.006816697	UP	0.337478954	1	NC	RPS4L_ARATH	Disease resistance protein RPS4 {ECO:0000303|PubMed:10571887}
TRINITY_DN5278_c1_g1	2.86489211	2.72E-11	UP	1.326848473	0.003165446	UP	-1.547701051	0.000686699	DOWN
TRINITY_DN666_c0_g3	-1.284802701	0.004568902	DOWN	-0.447780358	0.465108506	NC	0.828011794	0.197121726	NC	EFR_ARATH	LRR receptor-like serine/threonine-protein kinase EFR
TRINITY_DN858_c0_g1	-0.520775417	0.381914882	NC	-1.112956884	0.017444642	DOWN	-0.602361356	0.564091603	NC
TRINITY_DN11306_c0_g1	11.0592122	2.14E-31	UP	11.90244274	1.19E-38	UP	0.799410848	0.219158463	NC	UBQ11_ARATH	Polyubiquitin 11
TRINITY_DN13004_c0_g1	4.018304643	2.91E-19	UP	4.293881492	1.38E-21	UP	0.266144317	1	NC	SERA2_ARATH	D-3-phosphoglycerate dehydrogenase 2, chloroplastic
TRINITY_DN9445_c0_g1	2.151696445	4.38E-06	UP	2.455588402	1.13E-07	UP	0.29453612	1	NC	LAC4_ARATH	Laccase-4
TRINITY_DN23550_c0_g1	0.1488807	0.815518643	NC	1.366831792	0.002167653	UP	1.20820801	0.020062401	UP	TL15B_ARATH	Thylakoid lumenal 15.0 kDa protein 2, chloroplastic
TRINITY_DN1659_c0_g3	-0.123716038	0.882234822	NC	-1.35358434	0.002317423	DOWN	-1.23957984	0.012191832	DOWN	CDKD3_ARATH	Cyclin-dependent kinase D-3
TRINITY_DN8323_c0_g1	2.621080851	1.62E-08	UP	2.101162508	7.50E-06	NC	-0.530911915	0.700374913	NC
TRINITY_DN19937_c0_g1	1.515195483	0.000706712	UP	2.839340331	4.64E-11	UP	1.31507303	0.005913502	UP	HAT22_ARATH	Homeobox-leucine zipper protein HAT22
TRINITY_DN6465_c0_g1	0	1	NC	10.30330507	9.32E-26	UP	4.32753555	3.37E-18	UP
TRINITY_DN1141_c0_g1	2.811533003	2.90E-11	UP	2.491373487	2.96E-09	UP	-0.329553059	1	NC	XYNB_PRUPE	Putative beta-D-xylosidase
TRINITY_DN763_c0_g1	1.589214276	0.000221299	UP	1.588357391	0.000215918	UP	-0.010318282	1	NC
TRINITY_DN5292_c0_g1	3.42817485	4.08E-15	UP	4.149901027	1.04E-20	UP	0.712473621	0.326933378	NC
TRINITY_DN145995_c0_g1	0.509586498	0.384985742	NC	1.890864238	9.34E-06	UP	1.371733738	0.003622571	UP	LBP65_ARATH	Putative lipid-binding protein At4g00165
TRINITY_DN1574_c0_g2	10.20626844	1.20E-25	UP	9.096563441	1.11E-17	NC	-1.154423608	0.028517363	DOWN	CYPH_CATRO	Peptidyl-prolyl cis-trans isomerase
TRINITY_DN9113_c0_g1	-1.559462073	0.000487119	DOWN	-1.416039924	0.00167673	DOWN	0.133550785	1	NC
TRINITY_DN2344_c2_g2	1.608073567	0.000618526	NC	2.917123743	7.15E-11	UP	1.299456718	0.007866406	UP
TRINITY_DN3835_c2_g1	3.501626812	5.06E-15	UP	3.296165916	1.29E-13	UP	-0.215130701	1	NC
TRINITY_DN34139_c0_g1	1.274803181	0.003660812	UP	-0.613652053	0.248792409	NC	-1.897965128	1.39E-05	DOWN
TRINITY_DN2721_c1_g3	1.416262031	0.001050998	UP	1.001073945	0.028885566	UP	-0.424669954	0.898586229	NC	G3PA_TOBAC	Glyceraldehyde-3-phosphate dehydrogenase A, chloroplastic
TRINITY_DN3837_c0_g1	0.032864857	0.982121041	NC	1.850394459	2.35E-05	UP	1.8082473	5.65E-05	UP	ACR8_ARATH	ACT domain-containing protein ACR8 {ECO:0000305}
TRINITY_DN6168_c1_g1	-8.571536666	1.63E-36	DOWN	-9.173585118	3.41E-37	DOWN	0	1	NC
TRINITY_DN12508_c0_g1	0.995874217	0.033390923	NC	1.27782938	0.003948626	UP	0.27260982	1	NC
TRINITY_DN17715_c1_g1	-4.919446405	4.64E-25	DOWN	-4.787203251	1.43E-24	DOWN	0.122714681	1	NC
TRINITY_DN6485_c0_g1	-1.410164314	0.001140968	DOWN	-1.130533751	0.011543753	DOWN	0.2700893	1	NC	PSLS_METTH	Phosphosulfolactate synthase
TRINITY_DN16242_c0_g1	-1.147379581	0.014603258	DOWN	-2.166702672	1.12E-06	DOWN	-1.027125303	0.080676493	NC
TRINITY_DN12034_c1_g1	0.492646842	0.412498326	NC	1.24841805	0.006284019	UP	0.745983674	0.306011051	NC
TRINITY_DN10642_c0_g3	4.003361633	1.30E-17	UP	4.188860459	4.08E-19	UP	0.175687122	1	NC	R13L1_ARATH	Putative disease resistance RPP13-like protein 1
TRINITY_DN2840_c0_g1	2.819147003	4.02E-10	UP	3.179795654	1.48E-12	UP	0.350901313	1	NC	F179B_MOUSE	Protein FAM179B
TRINITY_DN10392_c0_g1	0.476692892	0.421103954	NC	-0.623685262	0.24970087	NC	-1.110156872	0.030915149	DOWN
TRINITY_DN1285_c0_g2	0.892617926	0.093973121	NC	1.515155935	0.001121832	UP	0.613346867	0.540469785	NC
TRINITY_DN5090_c0_g1	0.302208957	0.656154963	NC	-1.339446203	0.002175217	DOWN	-1.650985632	0.000229596	DOWN	NEP2_NEPGR	Aspartic proteinase nepenthesin-2
TRINITY_DN17266_c0_g1	1.474608786	0.001571554	UP	1.749825013	0.00011473	UP	0.266169233	1	NC
TRINITY_DN5760_c1_g1	-0.515077306	0.384292083	NC	-1.198495264	0.009670839	DOWN	-0.692398445	0.398419296	NC
TRINITY_DN11315_c0_g1	1.114324866	0.017732912	UP	1.013147158	0.033649001	UP	-0.111184602	1	NC	NOP56_SCHPO	Nucleolar protein 56
TRINITY_DN12193_c0_g1	-1.878603456	9.19E-06	DOWN	-1.469113777	0.000661034	DOWN	0.400132938	0.952944815	NC
TRINITY_DN1511_c0_g1	1.738717312	5.13E-05	UP	1.46727186	0.000766534	UP	-0.281103693	1	NC	PAP7_ARATH	Probable plastid-lipid-associated protein 7, chloroplastic
TRINITY_DN450_c1_g2	-1.425919488	0.001035505	DOWN	-1.272514343	0.003858116	DOWN	0.144092795	1	NC	PIGT_HUMAN	GPI transamidase component PIG-T
TRINITY_DN121_c0_g2	4.496407001	2.49E-21	UP	4.224788717	2.22E-19	UP	-0.281709958	1	NC
TRINITY_DN2411_c0_g1	7.480213678	6.82E-09	NC	10.9455703	8.64E-31	UP	3.423403748	7.36E-14	UP	NAP1A_TOBAC	Nucleosome assembly protein 1;1
TRINITY_DN9374_c1_g1	-1.016522203	0.026719252	DOWN	-0.93047512	0.046587709	NC	0.076765091	1	NC	ACT_SCHDU	Actin
TRINITY_DN34536_c0_g1	10.15251707	3.15E-25	UP	0	1	NC	-10.57090416	8.33E-33	DOWN	AFLD_ASPPA	Norsolorinic acid ketoreductase
TRINITY_DN6443_c0_g1	-1.439507802	0.001041382	DOWN	-2.276830984	9.01E-08	DOWN	-0.846964831	0.179035843	NC
TRINITY_DN7405_c1_g1	-1.71659435	0.000103354	DOWN	-1.656191492	0.000175483	DOWN	0.050073696	1	NC	NADK2_ORYSJ	Probable NAD kinase 2, chloroplastic
TRINITY_DN5923_c0_g1	-2.002469352	3.65E-06	DOWN	-1.759828798	4.96E-05	DOWN	0.233360129	1	NC	SCL14_ARATH	Scarecrow-like protein 14
TRINITY_DN1165_c0_g2	-1.100683876	0.01501671	DOWN	1.458823824	0.000698374	UP	2.550337189	2.61E-09	UP
TRINITY_DN7901_c0_g1	7.054783295	9.64E-18	NC	9.989348075	1.35E-39	UP	2.917826491	2.55E-11	UP	IF4A_NEUCR	ATP-dependent RNA helicase eIF4A
TRINITY_DN6637_c0_g3	2.113274988	2.66E-06	UP	1.861050331	4.35E-05	UP	-0.261524186	1	NC
TRINITY_DN3714_c1_g3	0.823460458	0.091360607	NC	1.419449481	0.001043529	UP	0.586653994	0.556165561	NC	PLC_LISMO	1-phosphatidylinositol phosphodiesterase
TRINITY_DN14164_c0_g1	2.194871907	0.00118055	NC	4.878676009	9.05E-18	UP	2.676203367	5.19E-09	UP
TRINITY_DN6880_c0_g3	1.241072121	0.005464079	UP	1.083988092	0.017665516	UP	-0.166322347	1	NC	TRMB_ARATH	tRNA (guanine-N(7)-)-methyltransferase {ECO:0000255|HAMAP-Rule:MF_03055}
TRINITY_DN20836_c0_g1	8.58397343	4.61E-15	NC	11.60214041	3.67E-36	UP	2.975044723	1.85E-11	UP	CPC1_NEUCR	Cross-pathway control protein 1
TRINITY_DN8301_c0_g1	2.134639661	6.38E-07	UP	2.320064165	5.32E-08	UP	0.175561701	1	NC	IAA8_ARATH	Auxin-responsive protein IAA8
TRINITY_DN6658_c1_g1	1.347028056	0.005097763	UP	-0.520733474	0.426237116	NC	-1.87822715	5.40E-05	DOWN
TRINITY_DN10513_c0_g1	1.038218177	0.022783412	UP	-0.935497066	0.044748406	NC	-1.983163062	5.02E-06	DOWN	S2544_HUMAN	Solute carrier family 25 member 44
TRINITY_DN15916_c0_g2	13.46162549	3.02E-51	UP	12.28187515	9.06E-42	UP	-1.223357479	0.012416563	DOWN	ACT1_ACACA	Actin-1
TRINITY_DN4376_c0_g1	1.208801758	0.006591645	UP	1.481442753	0.000584642	UP	0.263085275	1	NC	RGA1_SOLBU	Putative disease resistance protein RGA1
TRINITY_DN70293_c0_g1	-2.013355592	1.62E-06	DOWN	-2.185517811	1.73E-07	DOWN	-0.181388539	1	NC
TRINITY_DN777_c2_g1	1.018612009	0.027238202	UP	1.054305256	0.020806715	UP	0.026002284	1	NC	RGA3_SOLBU	Putative disease resistance protein RGA3
TRINITY_DN4793_c0_g1	10.55625681	2.49E-28	UP	0	1	NC	-10.9747434	5.02E-36	DOWN	YVDB_BACSU	Putative sulfate transporter YvdB
TRINITY_DN12554_c2_g1	12.16669436	2.11E-40	UP	6.35490319	2.67E-05	NC	-5.862498115	9.51E-32	DOWN	UBB_PONPY	Polyubiquitin-B
TRINITY_DN19984_c0_g1	4.497398888	5.17E-15	NC	5.219771369	2.74E-20	UP	0.712103423	0.35344168	NC	C89A2_ARATH	Cytochrome P450 89A2
TRINITY_DN9022_c0_g1	2.39248038	1.93E-08	UP	1.975421866	3.84E-06	UP	-0.426227795	0.898691783	NC
TRINITY_DN2405_c0_g1	0.630692701	0.236232789	NC	1.585849991	0.000210891	UP	0.945770014	0.089751803	NC	RNGB_DICDI	RING finger protein B
TRINITY_DN842_c1_g3	3.161609844	5.16E-13	UP	3.171161227	3.80E-13	UP	-1.92E-05	1	NC
TRINITY_DN7172_c1_g3	-0.53320015	0.349365275	NC	0.553028309	0.322334205	NC	1.077068537	0.038484293	UP	GST23_MAIZE	Glutathione transferase GST 23
TRINITY_DN50420_c0_g1	1.404827462	0.001168406	UP	1.199036865	0.006664009	UP	-0.215461546	1	NC
TRINITY_DN6320_c0_g1	0.289824419	0.696084712	NC	-0.913071193	0.067037705	NC	-1.212311765	0.017832834	DOWN
TRINITY_DN493_c1_g1	1.077960063	0.018337386	UP	0.823644392	0.091383128	NC	-0.263894115	1	NC	SETD3_XENTR	Histone-lysine N-methyltransferase setd3
TRINITY_DN2835_c0_g2	-1.342808906	0.002379589	DOWN	-1.433518755	0.001044501	DOWN	-0.099997659	1	NC	GDL76_ARATH	GDSL esterase/lipase At5g14450
TRINITY_DN4350_c0_g1	-1.365010537	0.00209423	DOWN	-1.201461564	0.007589367	DOWN	0.153695192	1	NC
TRINITY_DN10585_c0_g1	-0.708044312	0.177707488	NC	-1.266603626	0.005050585	DOWN	-0.568559247	0.62140609	NC
TRINITY_DN20_c0_g1	1.487481062	0.00086582	UP	-6.140659398	2.91E-24	NC	-7.659560334	3.05E-37	DOWN
TRINITY_DN11159_c0_g1	11.2478448	6.92E-33	UP	10.86279004	3.97E-30	UP	-0.428943304	0.90244638	NC	TBA_TRYBR	Tubulin alpha chain
TRINITY_DN3625_c0_g1	0.277443354	0.705479397	NC	1.448575507	0.001184229	UP	1.161636499	0.02280834	UP	HSFA3_ARATH	Heat stress transcription factor A-3
TRINITY_DN3353_c1_g1	2.072671357	1.88E-06	UP	0.969576165	0.047345285	NC	-1.11315862	0.031095804	DOWN
TRINITY_DN42367_c0_g1	11.24105856	7.52E-33	UP	9.052344889	2.35E-17	NC	-2.234060093	4.74E-07	DOWN	AASS_ARATH	Alpha-aminoadipic semialdehyde synthase
TRINITY_DN1442_c1_g1	1.383073956	0.002199732	UP	0.872476298	0.081701126	NC	-0.520277033	0.709941978	NC	PCL1_ARATH	Transcription factor LUX
TRINITY_DN6963_c0_g1	0	1	NC	11.01440308	2.36E-31	UP	11.38924781	2.23E-39	UP	SR3A_PHYPO	Spherulin-3A
TRINITY_DN123076_c0_g1	0	1	NC	11.33073721	6.19E-34	UP	11.70540547	5.92E-42	UP	SATP_SHIFL	Succinate-acetate/proton symporter SatP
TRINITY_DN2368_c0_g1	-0.662260403	0.211903275	NC	-1.222945775	0.006944199	DOWN	-0.567550422	0.628850771	NC
TRINITY_DN5075_c1_g1	-1.162977813	0.010858317	DOWN	-1.355451793	0.002282692	DOWN	-0.202135545	1	NC
TRINITY_DN11793_c0_g1	2.226041264	4.10E-06	NC	2.897733762	8.92E-10	UP	0.661660076	0.444230003	NC	KCS19_ARATH	3-ketoacyl-CoA synthase 19
TRINITY_DN14696_c0_g3	2.675495653	3.16E-10	UP	2.962769099	3.64E-12	UP	0.277649695	1	NC	TIC32_ARATH	Short-chain dehydrogenase TIC 32, chloroplastic
TRINITY_DN23356_c1_g1	-0.729803239	0.260018096	NC	1.445784886	0.00079403	UP	2.169478151	1.38E-06	UP
TRINITY_DN1820_c2_g2	2.73033411	1.00E-10	UP	3.321104214	6.94E-15	UP	0.581435215	0.564135953	NC	PIP28_ARATH	Probable aquaporin PIP2-8
TRINITY_DN7173_c0_g2	-1.54431761	0.000601101	DOWN	-0.984727592	0.040883056	NC	0.550245875	0.694827715	NC	PSKR1_ARATH	Phytosulfokine receptor 1
TRINITY_DN4652_c0_g1	-1.458037498	0.000972372	DOWN	-1.243066505	0.005783751	DOWN	0.205511815	1	NC	XERIC_ARATH	Probable E3 ubiquitin-protein ligase XERICO
TRINITY_DN2161_c1_g2	10.05961604	1.53E-24	NC	11.48579814	3.20E-35	UP	1.381922441	0.003860737	UP	XIRP2_MOUSE	Xin actin-binding repeat-containing protein 2
TRINITY_DN6643_c0_g1	-1.877674262	1.43E-05	DOWN	-2.674647701	6.03E-10	DOWN	-0.807815997	0.238753857	NC
TRINITY_DN3270_c0_g1	1.239349462	0.006318981	UP	1.109198232	0.016401082	UP	-0.139875232	1	NC	NAT2_ARATH	Nucleobase-ascorbate transporter 2
TRINITY_DN1999_c0_g1	-1.176073513	0.009655602	DOWN	-0.558436033	0.318166253	NC	0.608435208	0.529844339	NC
TRINITY_DN4670_c1_g2	-2.66744288	3.62E-10	DOWN	-1.808872711	2.08E-05	DOWN	0.849418888	0.171472269	NC	STP13_ARATH	Sugar transport protein 13
TRINITY_DN8647_c0_g1	0.676734535	0.210070867	NC	1.359332062	0.00264594	UP	0.67301074	0.421101838	NC
TRINITY_DN1844_c1_g2	1.771474716	0.000122061	UP	1.951688252	1.86E-05	UP	0.168386358	1	NC
TRINITY_DN1866_c0_g3	2.545772648	3.85E-08	UP	-0.173067114	0.887151483	NC	-2.729458403	2.17E-09	DOWN
TRINITY_DN10837_c0_g1	8.751332145	3.88E-16	NC	10.58819981	6.01E-28	UP	1.793982467	9.86E-05	UP	YI26_SCHPO	Uncharacterized amino-acid permease P7G5.06
TRINITY_DN5263_c0_g1	1.480677299	0.001536113	UP	0.167835678	0.855639583	NC	-1.323423394	0.008364516	DOWN	MFP2_ARATH	Peroxisomal fatty acid beta-oxidation multifunctional protein MFP2
TRINITY_DN5390_c0_g1	1.95752052	7.17E-06	UP	2.380218207	3.56E-08	UP	0.413328196	0.928975072	NC	GL24_ARATH	Germin-like protein subfamily 2 member 4
TRINITY_DN12605_c0_g1	-1.379496936	0.001489368	DOWN	-1.499292513	0.000468901	DOWN	-0.129436135	1	NC
TRINITY_DN14890_c0_g1	-0.88726353	0.085245402	NC	1.092591673	0.014396653	UP	1.970977429	9.44E-06	UP
TRINITY_DN692_c0_g2	-2.328829708	2.70E-08	DOWN	-3.938004256	1.28E-19	DOWN	-1.618621929	0.000312837	DOWN	RHP16_SCHPO	ATP-dependent helicase rhp16
TRINITY_DN115332_c0_g1	0	1	NC	10.84487071	5.59E-30	UP	3.366117824	2.32E-13	UP	NHP6_GIBZE	Non-histone chromosomal protein 6
TRINITY_DN2331_c5_g1	-0.914122367	0.06421728	NC	-1.721477322	0.000107727	DOWN	-0.817707205	0.234601043	NC
TRINITY_DN3806_c4_g1	4.83129121	1.61E-25	UP	2.827062115	1.00E-10	UP	-2.014314904	3.74E-06	DOWN	ZFP7_ARATH	Zinc finger protein 7
TRINITY_DN5373_c0_g3	0.40752459	0.551675279	NC	1.126529929	0.018501809	UP	0.709785042	0.360897457	NC	FERON_ARATH	Receptor-like protein kinase FERONIA
TRINITY_DN8136_c0_g1	2.670107074	2.04E-09	UP	-1.16996	0.058410243	NC	-3.856047949	1.22E-16	DOWN
TRINITY_DN3212_c0_g2	10.8322523	1.27E-29	UP	0	1	NC	-9.235614236	6.99E-37	DOWN	GUN5_THEFU	Endoglucanase E-5
TRINITY_DN6123_c0_g1	1.068982199	0.01880548	UP	0.927313623	0.048004507	NC	-0.151020879	1	NC
TRINITY_DN7492_c0_g1	5.485446275	3.66E-17	NC	7.549868261	6.67E-33	UP	2.052813864	3.70E-06	UP	GBLP_NEUCR	Guanine nucleotide-binding protein subunit beta-like protein
TRINITY_DN95_c0_g2	1.06520106	0.020350004	UP	-0.910947152	0.0567641	NC	-1.985809961	5.66E-06	DOWN
TRINITY_DN1412_c0_g1	-1.31369574	0.002946704	DOWN	-0.928152641	0.049415626	NC	0.376077838	0.995919894	NC	NEUR_DROVI	Protein neuralized
TRINITY_DN15464_c0_g1	8.430565076	4.06E-14	NC	10.26056726	3.01E-26	UP	1.787066946	0.000120957	UP	MPPB_NEUCR	Mitochondrial-processing peptidase subunit beta
TRINITY_DN3074_c0_g1	-1.947609831	3.85E-06	DOWN	-1.997257975	2.02E-06	DOWN	-0.059224835	1	NC
TRINITY_DN462_c0_g1	-1.952649223	3.47E-06	DOWN	-2.553828091	1.10E-09	DOWN	-0.610703935	0.50888284	NC	SUT34_ARATH	Probable sulfate transporter 3.4
TRINITY_DN7981_c0_g2	-1.532823397	0.000549241	DOWN	-1.979384212	5.68E-06	DOWN	-0.456255872	0.877491287	NC
TRINITY_DN9384_c0_g1	2.193191464	1.83E-07	UP	1.864812517	1.01E-05	UP	-0.338673087	1	NC	C81D1_ARATH	Cytochrome P450 81D1
TRINITY_DN8738_c0_g2	10.81208052	1.77E-29	UP	0	1	NC	-11.23082335	4.25E-38	DOWN	SSH_XENLA	Protein phosphatase Slingshot homolog
TRINITY_DN11695_c0_g1	-2.13650407	5.53E-07	DOWN	-0.662536717	0.208021796	NC	1.464666289	0.00180292	UP	ATL41_ARATH	E3 ubiquitin-protein ligase ATL41
TRINITY_DN8513_c0_g1	-1.805413445	3.14E-05	DOWN	-0.352937714	0.593351777	NC	1.443051186	0.00238019	UP	RQL4A_ARATH	ATP-dependent DNA helicase Q-like 4A
TRINITY_DN2540_c2_g1	0	1	NC	10.61944526	3.47E-28	UP	5.22896291	9.19E-25	UP	EF3B_YEAST	Elongation factor 3B
TRINITY_DN110400_c0_g1	0	1	NC	11.9284435	7.44E-39	UP	5.43431535	4.19E-28	UP	SCUB3_MOUSE	Signal peptide, CUB and EGF-like domain-containing protein 3
TRINITY_DN18550_c0_g1	2.089151736	1.01E-06	UP	2.383849886	2.12E-08	UP	0.28514232	1	NC
TRINITY_DN13367_c0_g1	10.50415047	6.17E-28	UP	12.95730231	2.98E-47	UP	2.409219975	2.66E-08	UP	RS12_BLUGH	40S ribosomal protein S12
TRINITY_DN14129_c0_g2	0	1	NC	12.29357104	7.41E-42	UP	8.842657791	8.23E-45	UP	CYSP5_DICDI	Cysteine proteinase 5
TRINITY_DN383_c0_g1	-1.20934274	0.00626369	DOWN	-1.289258991	0.003154098	DOWN	-0.089277166	1	NC	SODM_PRUPE	Superoxide dismutase [Mn], mitochondrial
TRINITY_DN4807_c0_g3	1.089236806	0.024908463	UP	1.144399454	0.016451901	UP	0.045876423	1	NC	PP188_ARATH	Pentatricopeptide repeat-containing protein At2g36730
TRINITY_DN274_c2_g1	1.908301911	8.98E-06	UP	2.143344458	4.93E-07	UP	0.225638126	1	NC	Y5738_ARATH	BTB/POZ domain-containing protein At5g67385
TRINITY_DN123370_c0_g1	0	1	NC	10.16594297	1.50E-25	UP	5.335743023	2.13E-22	UP
TRINITY_DN4029_c0_g1	1.214503525	0.007267959	UP	1.085223807	0.018531551	UP	-0.138997568	1	NC
TRINITY_DN3860_c1_g1	2.967877085	2.49E-12	UP	-1.115442406	0.013883365	DOWN	-4.092950999	2.02E-20	DOWN	NO93_SOYBN	Early nodulin-93
TRINITY_DN130845_c0_g1	-0.251218381	0.728022715	NC	-1.130246953	0.01262636	DOWN	-0.888293715	0.132639869	NC
TRINITY_DN115_c0_g2	1.655463643	0.000477364	NC	2.084940823	5.47E-06	UP	0.419826417	0.937778429	NC	BXL5_ARATH	Probable beta-D-xylosidase 5
TRINITY_DN2438_c0_g1	3.623634183	2.57E-10	NC	5.993073576	2.00E-27	UP	2.359209026	8.61E-08	UP
TRINITY_DN11055_c0_g1	-0.605363566	0.257486511	NC	-1.280890028	0.003351666	DOWN	-0.68242573	0.373599594	NC
TRINITY_DN44254_c0_g1	-1.399299776	0.001863825	DOWN	-2.725957782	5.04E-10	DOWN	-1.336909555	0.008676965	DOWN	TGD1_ARATH	Protein TRIGALACTOSYLDIACYLGLYCEROL 1, chloroplastic
TRINITY_DN29035_c0_g2	10.02835682	2.49E-24	UP	0	1	NC	-10.44633028	7.66E-32	DOWN	EF3_CANAL	Elongation factor 3
TRINITY_DN8090_c0_g1	-1.759265686	6.63E-05	DOWN	-3.114828951	4.45E-12	DOWN	-1.364667904	0.009873733	NC
TRINITY_DN5441_c0_g1	1.6763661	0.000153673	UP	1.887217526	1.56E-05	UP	0.201255247	1	NC	PDR3_TOBAC	Pleiotropic drug resistance protein 3
TRINITY_DN8245_c0_g2	-0.853144793	0.082675606	NC	-1.106116343	0.016025413	DOWN	-0.261467456	1	NC
TRINITY_DN80794_c0_g1	0	1	NC	10.37231343	2.81E-26	UP	10.74739505	2.99E-34	UP
TRINITY_DN13566_c0_g4	2.397135999	1.62E-08	UP	1.725910803	5.81E-05	UP	-0.681013354	0.380739845	NC
TRINITY_DN151_c3_g3	1.141540096	0.010755654	UP	1.096940549	0.014657122	UP	-0.05402847	1	NC	SPY_PETHY	Probable UDP-N-acetylglucosamine--peptide N-acetylglucosaminyltransferase SPINDLY
TRINITY_DN9087_c2_g2	1.069571327	0.034558209	NC	2.268413104	3.41E-07	UP	1.189599782	0.018939197	UP	MYBC_MAIZE	Anthocyanin regulatory C1 protein
TRINITY_DN13628_c0_g1	8.437018017	3.42E-14	NC	10.30414171	9.32E-26	UP	1.824419531	8.31E-05	UP	NEW1_YEAST	[NU+] prion formation protein 1
TRINITY_DN229_c0_g2	1.110370121	0.013973872	UP	0.857063405	0.073734889	NC	-0.26285872	1	NC	GGT2_ARATH	Glutamate--glyoxylate aminotransferase 2
TRINITY_DN2037_c1_g2	3.000673692	1.76E-12	UP	0.436308067	0.476706483	NC	-2.573963034	1.92E-09	DOWN	AEDO_MOUSE	2-aminoethanethiol dioxygenase
TRINITY_DN3452_c1_g2	-0.774519629	0.116644585	NC	-2.228326407	1.03E-07	DOWN	-1.46330121	0.001470342	DOWN
TRINITY_DN8724_c0_g1	1.922573952	5.92E-06	UP	1.821990927	1.82E-05	UP	-0.110406723	1	NC	NUD25_ARATH	Nudix hydrolase 25
TRINITY_DN4320_c0_g1	1.613082823	0.00020731	UP	0.330489744	0.581101636	NC	-1.293318286	0.009468252	DOWN
TRINITY_DN5321_c0_g1	6.053642175	4.54E-24	UP	0	1	NC	-4.409119345	3.26E-19	DOWN	RL11_PONAB	60S ribosomal protein L11
TRINITY_DN5043_c0_g1	1.068587937	0.030994542	UP	1.217307686	0.011312763	UP	0.13939978	1	NC	YBDL_ECOLI	Methionine aminotransferase
TRINITY_DN6615_c0_g2	7.641817789	1.17E-09	NC	12.08064273	4.01E-40	UP	4.397446325	1.67E-21	UP	RL34_DICDI	60S ribosomal protein L34
TRINITY_DN4909_c0_g2	2.244247431	2.61E-07	UP	0.72848749	0.178077134	NC	-1.52563548	0.000987087	DOWN
TRINITY_DN13566_c0_g1	-1.518709805	0.000433133	DOWN	-0.621989672	0.24306422	NC	0.887114553	0.131512676	NC
TRINITY_DN113_c0_g3	1.077764459	0.01773865	UP	0.553126861	0.318200595	NC	-0.533970963	0.668535803	NC
TRINITY_DN1434_c0_g1	-1.553799528	0.000279453	DOWN	-1.402966243	0.001152616	DOWN	0.141395643	1	NC	SR45A_ARATH	Serine/arginine-rich splicing factor SR45a
TRINITY_DN1153_c1_g1	2.613312417	1.01E-07	NC	2.87942894	3.10E-09	UP	0.256277042	1	NC	LOR8_ARATH	Protein LURP-one-related 8
TRINITY_DN145869_c0_g1	-1.293407665	0.003682524	DOWN	-0.347658805	0.597612873	NC	0.936409315	0.101563381	NC	CP74_LINUS	Allene oxide synthase, chloroplastic
TRINITY_DN15511_c0_g2	1.154340104	0.012270642	UP	1.446427238	0.001065252	UP	0.283012111	1	NC
TRINITY_DN5906_c0_g1	2.968418117	1.07E-10	UP	2.699770312	4.27E-09	UP	-0.278577677	1	NC	RHIE_DICD3	Rhamnogalacturonate lyase
TRINITY_DN4102_c1_g2	-12.10223017	3.78E-44	DOWN	-12.13705701	9.69E-45	DOWN	0	1	NC
TRINITY_DN10914_c0_g2	10.05095077	1.77E-24	NC	11.94492399	5.45E-39	UP	1.850286047	3.43E-05	UP	RL6B_YEAST	60S ribosomal protein L6-B
TRINITY_DN1694_c0_g1	1.382638036	0.001830064	UP	0.97397083	0.03979501	NC	-0.418272922	0.91722328	NC	SPL2_ARATH	Squamosa promoter-binding-like protein 2
TRINITY_DN4582_c1_g3	0	1	NC	2.857226103	8.02E-10	UP	4.465061369	6.69E-19	UP
TRINITY_DN10547_c0_g1	4.435074281	1.57E-22	UP	4.605883249	4.87E-24	UP	0.160983661	1	NC	NLTP2_PRUAR	Non-specific lipid-transfer protein 2
TRINITY_DN1217_c0_g3	1.930214929	1.69E-05	UP	1.836470689	4.70E-05	UP	-0.102902895	1	NC
TRINITY_DN3384_c1_g2	0.397960849	0.536826961	NC	1.123799161	0.015661314	UP	0.715453148	0.35228276	NC
TRINITY_DN1965_c0_g1	-1.30958384	0.002683519	DOWN	-1.32112254	0.002372498	DOWN	-0.021052226	1	NC	G3P_ATRNU	Glyceraldehyde-3-phosphate dehydrogenase
TRINITY_DN11000_c0_g1	0.784195446	0.274755827	NC	1.779184297	0.00054872	UP	0.987273994	0.089463697	NC	R13L1_ARATH	Putative disease resistance RPP13-like protein 1
TRINITY_DN1425_c0_g1	1.765548063	2.95E-05	UP	1.454116427	0.000711115	UP	-0.320762949	1	NC	PLAS_SOLLC	Plastocyanin, chloroplastic
TRINITY_DN5379_c0_g1	10.48059389	9.38E-28	UP	9.21938487	1.46E-18	NC	-1.30507296	0.008994371	DOWN	ABCF2_HUMAN	ATP-binding cassette sub-family F member 2
TRINITY_DN8854_c0_g2	-7.760591348	2.65E-11	NC	2.796187586	5.38E-10	UP	10.96710526	5.55E-36	UP
TRINITY_DN42202_c0_g1	-3.656364406	2.39E-17	DOWN	-3.502957061	2.70E-16	DOWN	0.144370131	1	NC	DEF_LENCC	Defensin Lc-def {ECO:0000303|PubMed:18468512, ECO:0000312|EMBL:ABP04037.1}
TRINITY_DN6738_c0_g1	1.571001379	0.000272765	UP	1.609491924	0.000178579	UP	0.028984989	1	NC	BZR1_ARATH	Protein BRASSINAZOLE-RESISTANT 1
TRINITY_DN4769_c0_g2	-2.360140959	2.48E-08	DOWN	-2.516240857	2.76E-09	DOWN	-0.165610222	1	NC	PUB4_ARATH	U-box domain-containing protein 4
TRINITY_DN9241_c1_g1	-1.463112652	0.000723731	DOWN	-1.699194303	6.48E-05	DOWN	-0.245354454	1	NC
TRINITY_DN3879_c3_g1	2.000394838	4.24E-06	UP	1.823437061	3.06E-05	UP	-0.186563912	1	NC	PHYK1_SOYBN	Probable phytol kinase 1, chloroplastic
TRINITY_DN1650_c0_g1	-1.308687616	0.002725404	DOWN	-1.316295532	0.002494458	DOWN	-0.017050696	1	NC	NAT6_ARATH	Nucleobase-ascorbate transporter 6
TRINITY_DN1611_c1_g1	1.272662379	0.008269341	NC	1.402143717	0.003010688	UP	0.11987961	1	NC
TRINITY_DN13596_c0_g1	2.383596375	1.32E-08	UP	0.723956814	0.150326002	NC	-1.669176096	0.000177779	DOWN
TRINITY_DN10397_c0_g1	3.253709381	5.43E-11	NC	4.217203976	2.27E-17	UP	0.952906465	0.108969341	NC
TRINITY_DN5854_c0_g1	1.679713775	0.000179189	UP	1.72499905	0.000113055	UP	0.035738347	1	NC	E1312_ARATH	Glucan endo-1,3-beta-glucosidase 12
TRINITY_DN487_c2_g1	-2.552244669	2.50E-09	DOWN	-3.363645763	1.32E-14	DOWN	-0.820951433	0.231593889	NC	DOF34_ARATH	Dof zinc finger protein DOF3.4
TRINITY_DN4599_c2_g1	2.236525298	2.38E-07	UP	2.015041387	3.53E-06	UP	-0.23113721	1	NC	ACR6_ARATH	ACT domain-containing protein ACR6 {ECO:0000305}
TRINITY_DN11876_c1_g1	-1.409307507	0.0015219	DOWN	-3.071166196	3.62E-12	DOWN	-1.670723361	0.000471367	DOWN
TRINITY_DN16570_c0_g1	-1.301300222	0.004616515	DOWN	-1.933211186	1.01E-05	DOWN	-0.644462895	0.487639259	NC
TRINITY_DN5617_c0_g1	2.942643367	3.69E-11	UP	2.680251454	1.34E-09	UP	-0.271983045	1	NC	FRO7_ARATH	Ferric reduction oxidase 7, chloroplastic
TRINITY_DN11018_c0_g1	1.933438031	6.88E-06	UP	2.404356349	1.78E-08	UP	0.460459963	0.837526314	NC
TRINITY_DN22372_c0_g1	0	1	NC	10.07946868	6.98E-25	UP	10.4548049	6.58E-32	UP	RL29_YEAST	60S ribosomal protein L29
TRINITY_DN8_c0_g1	1.428799505	0.001080001	UP	1.3790765	0.001651516	UP	-0.059183354	1	NC	RGAP1_ARATH	Rho GTPase-activating protein 1
TRINITY_DN1772_c0_g1	1.133660148	0.012898475	UP	1.235618327	0.005719901	UP	0.09249255	1	NC
TRINITY_DN6143_c1_g3	2.249437761	1.57E-06	UP	2.673330072	7.94E-09	UP	0.413894768	0.943402511	NC	RBK2_ARATH	Receptor-like cytosolic serine/threonine-protein kinase RBK2
TRINITY_DN6728_c0_g1	1.044827531	0.030065123	UP	0.758265263	0.151234261	NC	-0.296545348	1	NC
TRINITY_DN18208_c0_g1	1.669062038	9.35E-05	UP	1.724582911	4.99E-05	UP	0.045948066	1	NC	GAPN_NICPL	NADP-dependent glyceraldehyde-3-phosphate dehydrogenase
TRINITY_DN1946_c1_g1	1.17866382	0.011503664	UP	1.079704372	0.023095065	UP	-0.10827463	1	NC	PLY12_ARATH	Probable pectate lyase 12
TRINITY_DN2138_c1_g1	1.14118933	0.013945687	UP	1.607695511	0.000245402	UP	0.457119427	0.838097841	NC	GDIR_ARATH	Rho GDP-dissociation inhibitor 1
TRINITY_DN4210_c0_g1	-1.554072177	0.000279814	DOWN	-1.462790238	0.000659556	DOWN	0.081929472	1	NC	GALM_MOUSE	Aldose 1-epimerase
TRINITY_DN5625_c0_g1	-1.386884682	0.001711002	DOWN	-2.303695369	7.76E-08	DOWN	-0.925737776	0.117309283	NC
TRINITY_DN2889_c0_g4	-2.19468024	1.44E-06	NC	0.434413076	0.492803518	NC	2.620940689	7.00E-09	UP	PME2_CITSI	Pectinesterase 2
TRINITY_DN2077_c0_g1	1.717142994	5.49E-05	UP	1.709880532	5.75E-05	UP	-0.016800885	1	NC	CSPL8_RICCO	CASP-like protein 1F1
TRINITY_DN2754_c0_g4	0.192312565	0.839844875	NC	1.894891712	6.36E-05	UP	1.69487477	0.000383333	UP	GLPT3_ARATH	Putative glycerol-3-phosphate transporter 3
TRINITY_DN2058_c0_g1	3.125409929	1.46E-11	UP	2.99038467	9.44E-11	UP	-0.144665879	1	NC
TRINITY_DN4995_c1_g1	10.20089042	1.27E-25	UP	8.211014425	7.99E-13	NC	-2.034532878	1.01E-05	DOWN	UBIQP_XENLA	Polyubiquitin
TRINITY_DN2409_c0_g1	-0.870474474	0.06814362	NC	-1.264759203	0.00389067	DOWN	-0.403664114	0.940168811	NC	HIP26_ARATH	Heavy metal-associated isoprenylated plant protein 26
TRINITY_DN3423_c0_g1	0.972721554	0.03638991	NC	-0.334375118	0.613929789	NC	-1.316337813	0.00559936	DOWN	ATL57_ARATH	RING-H2 finger protein ATL57
TRINITY_DN16860_c0_g2	-6.129528927	1.67E-27	DOWN	-10.80742466	8.86E-34	DOWN	0	1	NC
TRINITY_DN12739_c0_g1	-1.172628649	0.008542529	DOWN	-2.740560472	7.37E-11	DOWN	-1.577850132	0.000492832	DOWN
TRINITY_DN17574_c0_g1	1.584033768	0.000214918	UP	1.472363779	0.000625851	UP	-0.122357817	1	NC	DBR_TOBAC	2-alkenal reductase (NADP(+)-dependent)
TRINITY_DN11726_c0_g1	1.485843764	0.001470424	UP	1.02768915	0.041827628	NC	-0.467684306	0.840090433	NC	TI214_NICTO	Protein TIC 214 {ECO:0000250|UniProtKB:P56785}
TRINITY_DN15752_c0_g1	-2.479313373	1.39E-08	DOWN	-2.801477743	1.77E-10	DOWN	-0.330469471	1	NC	YTX2_XENLA	Transposon TX1 uncharacterized 149 kDa protein
TRINITY_DN4908_c0_g2	10.67328447	3.03E-29	UP	0	1	NC	-11.09202809	5.73E-37	DOWN	RL211_ARATH	60S ribosomal protein L21-1
TRINITY_DN3890_c0_g2	1.993043017	3.78E-06	UP	2.229520501	1.97E-07	UP	0.226874994	1	NC	PGLR3_ARATH	Probable polygalacturonase At3g15720
TRINITY_DN1755_c2_g2	1.125262459	0.020333834	UP	1.555289164	0.000626551	UP	0.420499192	0.929099815	NC	STIL3_ARATH	Protein STICHEL-like 3
TRINITY_DN4756_c0_g3	5.126683764	5.57E-19	UP	0	1	NC	-3.940925035	2.60E-16	DOWN
TRINITY_DN4177_c0_g1	1.122041994	0.013504907	UP	1.653206831	0.000111879	UP	0.52192156	0.695107064	NC	R13L1_ARATH	Putative disease resistance RPP13-like protein 1
TRINITY_DN10669_c0_g1	1.830557307	5.80E-05	UP	1.53045174	0.000993918	UP	-0.309727469	1	NC	P4KG7_ARATH	Phosphatidylinositol 4-kinase gamma 7
TRINITY_DN5717_c0_g1	10.23688475	6.81E-26	UP	0	1	NC	-10.65549795	1.72E-33	DOWN	COAA_DICDI	Coactosin
TRINITY_DN6631_c0_g1	1.731909634	5.72E-05	UP	1.75445747	4.32E-05	UP	0.013017156	1	NC
TRINITY_DN9322_c0_g1	-0.726373201	0.163107832	NC	-11.42823786	6.68E-39	DOWN	-11.08644165	6.27E-37	DOWN	TOC75_ORYSJ	Protein TOC75, chloroplastic
TRINITY_DN11795_c0_g1	10.09833709	7.85E-25	NC	10.50362251	2.79E-27	UP	0.361301327	1	NC	RS19_EMENI	40S ribosomal protein S19
TRINITY_DN7837_c0_g1	3.300589257	2.78E-14	UP	2.808098931	5.65E-11	UP	-0.501979176	0.739814334	NC	HPR1_ARATH	Glycerate dehydrogenase HPR, peroxisomal
TRINITY_DN2010_c0_g1	-1.200517654	0.006763555	DOWN	-1.51942718	0.000383623	DOWN	-0.328486009	1	NC	ACLA3_ORYSJ	ATP-citrate synthase alpha chain protein 3
TRINITY_DN17719_c0_g1	1.074203619	0.023674805	UP	-0.78005487	0.179051702	NC	-1.864203355	5.94E-05	DOWN	MPCP3_ARATH	Mitochondrial phosphate carrier protein 3, mitochondrial
TRINITY_DN3713_c0_g2	1.161488741	0.020447343	NC	1.76683926	0.000125757	UP	0.596305338	0.571834639	NC
TRINITY_DN13327_c0_g1	1.282584754	0.003986714	UP	0.720639037	0.160942844	NC	-0.571580069	0.593088458	NC	PURU2_ARATH	Formyltetrahydrofolate deformylase 2, mitochondrial
TRINITY_DN4669_c0_g1	1.486731503	0.000578353	UP	1.447429959	0.00081387	UP	-0.04863496	1	NC	C81E9_MEDTR	Isoflavone 3'-hydroxylase {ECO:0000303|PubMed:14617078}
TRINITY_DN2133_c3_g1	-1.842183899	2.13E-05	DOWN	-1.998941271	3.47E-06	DOWN	-0.166263257	1	NC	NU2M_OENBE	NADH-ubiquinone oxidoreductase chain 2
TRINITY_DN6097_c0_g2	9.391261566	1.27E-19	NC	12.7294432	2.04E-45	UP	3.294503821	5.64E-14	UP	ACTP_ACACA	Actophorin
TRINITY_DN4816_c0_g1	10.32402096	1.49E-26	UP	12.24483457	1.84E-41	UP	1.877413138	2.34E-05	UP	RS27_NEUCR	40S ribosomal protein S27
TRINITY_DN1377_c0_g3	3.799217052	1.76E-16	UP	3.882088861	3.31E-17	UP	0.073126751	1	NC
TRINITY_DN5782_c0_g1	2.425064785	8.48E-09	UP	2.750245424	6.85E-11	UP	0.315870915	1	NC	YSL3_ARATH	Metal-nicotianamine transporter YSL3
TRINITY_DN131_c5_g1	-2.753793467	6.96E-10	DOWN	-2.237334376	3.79E-07	DOWN	0.506320442	0.830814828	NC
TRINITY_DN6038_c3_g1	-0.393852029	0.535634809	NC	-1.530188584	0.000469754	DOWN	-1.145948465	0.025409249	DOWN
TRINITY_DN4474_c0_g1	1.235882251	0.006112284	UP	0.993124672	0.034757356	NC	-0.252386258	1	NC	PP397_ARATH	Pentatricopeptide repeat-containing protein At5g25630
TRINITY_DN570_c0_g1	0.757745785	0.134190139	NC	1.114639569	0.014099256	UP	0.347356835	1	NC	FBD41_ARATH	FBD-associated F-box protein At5g18780
TRINITY_DN411_c0_g3	1.986147114	1.78E-05	UP	0.510294701	0.456369586	NC	-1.4862919	0.002096972	DOWN
TRINITY_DN15650_c0_g1	-0.69009085	0.191691575	NC	-3.73383206	3.67E-16	DOWN	-3.053516572	2.75E-11	DOWN
TRINITY_DN6109_c0_g1	4.69047894	2.27E-25	UP	5.149084136	2.70E-29	UP	0.449273269	0.842506559	NC	TIP11_ARATH	Aquaporin TIP1-1
TRINITY_DN1840_c0_g1	1.39597832	0.003415364	NC	1.732105196	0.000153998	UP	0.326589031	1	NC	XTH28_ARATH	Probable xyloglucan endotransglucosylase/hydrolase protein 28
TRINITY_DN12255_c0_g1	-1.204678907	0.006639694	DOWN	-0.478684236	0.409292799	NC	0.716996418	0.320112921	NC
TRINITY_DN9339_c0_g1	7.925585027	3.72E-11	NC	11.15440226	1.70E-32	UP	3.186450786	1.48E-12	UP
TRINITY_DN5061_c0_g1	-1.082693621	0.017089728	DOWN	-0.666833001	0.199118145	NC	0.406419662	0.93826105	NC	ZOG_PHALU	Zeatin O-glucosyltransferase
TRINITY_DN2790_c2_g1	4.094037672	1.16E-14	UP	3.069945883	2.06E-08	NC	-1.034701763	0.060753851	NC
TRINITY_DN4602_c1_g1	-6.828579173	3.54E-38	DOWN	-5.003649489	1.25E-26	DOWN	1.819680353	0.001095406	NC	TI10A_ARATH	Protein TIFY 10A
TRINITY_DN145931_c0_g1	1.550582596	0.000299622	UP	2.185027085	1.87E-07	UP	0.624944332	0.480032538	NC
TRINITY_DN3533_c0_g1	3.076167067	1.43E-11	UP	3.558050158	5.23E-15	UP	0.472161307	0.810889997	NC	C76B6_CATRO	Geraniol 8-hydroxylase
TRINITY_DN1628_c0_g1	-0.286351138	0.690855557	NC	-1.196827861	0.008619619	DOWN	-0.920119659	0.115558896	NC	M2K5_ARATH	Mitogen-activated protein kinase kinase 5
TRINITY_DN4284_c0_g1	2.716209884	6.43E-10	UP	2.863466137	6.51E-11	UP	0.137276822	1	NC	C85A_PHAVU	Cytochrome P450 85A
TRINITY_DN4748_c0_g1	2.510810105	2.36E-09	UP	2.655477095	2.64E-10	UP	0.13511761	1	NC	AHP1_ARATH	Histidine-containing phosphotransfer protein 1
TRINITY_DN14591_c0_g2	2.570054443	1.37E-08	UP	2.626198518	6.19E-09	UP	0.046205808	1	NC
TRINITY_DN695_c0_g1	0.137981978	0.863888752	NC	-1.284459468	0.003250262	DOWN	-1.431983181	0.001923213	DOWN	ALF_ORYSJ	Fructose-bisphosphate aldolase cytoplasmic isozyme
TRINITY_DN100325_c0_g1	-10.88217174	5.37E-34	DOWN	-10.91683201	1.14E-34	DOWN	0	1	NC	COX2_DROAM	Cytochrome c oxidase subunit 2
TRINITY_DN4076_c0_g5	-1.248153233	0.007156262	DOWN	-1.927522178	1.44E-05	DOWN	-0.689236575	0.435298339	NC	CIPKC_ARATH	CBL-interacting serine/threonine-protein kinase 12
TRINITY_DN9318_c0_g1	7.799992682	1.41E-10	NC	11.88752588	1.61E-38	UP	4.045650009	7.88E-19	UP	RL38_NEUCR	60S ribosomal protein L38
TRINITY_DN21394_c0_g1	8.786400258	2.16E-16	NC	10.77187284	2.11E-29	UP	1.941934933	2.01E-05	UP	Y8017_DICDI	Sphingomyelinase DDB_G0288017
TRINITY_DN20737_c0_g1	5.363528811	6.04E-26	UP	4.541671266	9.67E-20	UP	-0.832155574	0.182417481	NC
TRINITY_DN8685_c0_g1	7.043158009	2.36E-27	UP	8.097779737	1.09E-35	UP	1.041932984	0.051618072	NC	EF1A_COCIM	Elongation factor 1-alpha
TRINITY_DN423_c4_g1	-1.767675489	3.24E-05	DOWN	-1.742111414	4.15E-05	DOWN	0.016061706	1	NC	ESCA_ARATH	Putative DNA-binding protein ESCAROLA
TRINITY_DN3102_c1_g2	1.34700617	0.002035441	UP	1.483959471	0.000558974	UP	0.127658847	1	NC	EXP15_ARATH	Expansin-A15
TRINITY_DN19559_c0_g1	1.511842316	0.000905734	UP	0.989657782	0.047324163	NC	-0.531182242	0.704713774	NC
TRINITY_DN1417_c0_g2	0	1	NC	10.67749982	1.21E-28	UP	11.05285963	1.15E-36	UP
TRINITY_DN3999_c0_g1	1.153058155	0.011359282	UP	2.166866919	3.14E-07	UP	1.004557601	0.061981826	NC
TRINITY_DN33071_c0_g1	0.61130595	0.314143527	NC	1.133396058	0.02116746	UP	0.512873564	0.751796035	NC	PLSP1_ARATH	Chloroplast processing peptidase
TRINITY_DN23745_c0_g1	-0.937125433	0.048698678	NC	-5.758992256	1.50E-30	DOWN	-4.83483622	2.47E-23	DOWN
TRINITY_DN4155_c0_g2	-1.204158127	0.009468267	DOWN	-0.585292605	0.299195837	NC	0.609076731	0.555495887	NC
TRINITY_DN1889_c0_g1	3.248780651	6.48E-13	UP	3.326160305	1.43E-13	UP	0.067304622	1	NC
TRINITY_DN8802_c0_g1	6.191869268	1.94E-20	UP	7.035107547	2.55E-27	UP	0.831143123	0.1952608	NC
TRINITY_DN139372_c0_g1	7.414368874	1.49E-08	NC	10.13824744	2.53E-25	UP	2.681907304	7.51E-09	UP	PHYB_PHYPO	Ribonuclease Phyb
TRINITY_DN2078_c0_g1	-0.691725047	0.178635771	NC	-1.052614519	0.020718853	DOWN	-0.370466128	1	NC
TRINITY_DN2944_c0_g4	-1.188940989	0.007957154	DOWN	-1.211996846	0.006469223	DOWN	-0.032304221	1	NC
TRINITY_DN2889_c0_g1	3.269053794	2.89E-14	UP	3.204752364	7.11E-14	UP	-0.073722923	1	NC	PME3_CITSI	Pectinesterase 3
TRINITY_DN110246_c0_g1	0	1	NC	12.17033391	7.37E-41	UP	12.54488205	7.12E-49	UP
TRINITY_DN3147_c3_g1	1.670497689	9.35E-05	UP	1.638614316	0.000125663	UP	-0.04128934	1	NC	GLK2_ARATH	Transcription activator GLK2
TRINITY_DN9700_c0_g1	0	1	NC	10.27080795	2.54E-26	UP	3.670562854	2.05E-14	UP	IMB4_SCHPO	Probable importin subunit beta-4
TRINITY_DN6647_c0_g2	-1.016255776	0.028319229	DOWN	-1.234362147	0.005535436	DOWN	-0.227796841	1	NC
TRINITY_DN1153_c0_g1	-0.992602892	0.031983531	NC	-1.168339705	0.008803629	DOWN	-0.185044786	1	NC
TRINITY_DN7336_c0_g1	0.480932498	0.40981231	NC	-0.675879706	0.191605984	NC	-1.166590173	0.01918996	DOWN
TRINITY_DN39657_c0_g1	1.175618583	0.012575057	UP	0.506799935	0.417324586	NC	-0.678245073	0.405135696	NC	DRL21_ARATH	Putative disease resistance protein At3g14460
TRINITY_DN5358_c0_g5	10.50583877	6.17E-28	UP	0	1	NC	-6.697568747	3.58E-29	DOWN	RS30_SCHPO	40S ribosomal protein S30
TRINITY_DN1154_c0_g1	-5.477131731	7.87E-26	DOWN	-4.205153395	2.42E-18	DOWN	0	1	NC
TRINITY_DN9234_c0_g2	0	1	NC	11.13832909	2.25E-32	UP	5.897616201	1.35E-28	UP	FDH_EMENI	Probable formate dehydrogenase
TRINITY_DN19082_c0_g2	1.056299602	0.02226079	UP	0.318837759	0.64268167	NC	-0.74714158	0.282740354	NC	HAT5_ARATH	Homeobox-leucine zipper protein HAT5
TRINITY_DN666_c3_g1	1.279872748	0.004046208	UP	1.26954866	0.004263345	UP	-0.020898229	1	NC
TRINITY_DN7786_c0_g2	4.100533609	2.56E-14	NC	4.523968702	1.26E-17	UP	0.413188566	0.944867808	NC	AB16G_ARATH	ABC transporter G family member 16
TRINITY_DN1470_c1_g1	1.332671787	0.002988713	UP	1.279413119	0.00452694	UP	-0.062872341	1	NC	FTSZ1_ARATH	Cell division protein FtsZ homolog 1, chloroplastic
TRINITY_DN7384_c0_g1	1.178371041	0.010269316	UP	0.932610725	0.053462485	NC	-0.255117847	1	NC	TERT_ARATH	Telomerase reverse transcriptase
TRINITY_DN11916_c0_g1	4.077856717	1.99E-19	UP	3.569222744	9.87E-16	UP	-0.518302153	0.702907247	NC
TRINITY_DN179_c1_g1	3.325604634	3.98E-12	UP	2.411369476	8.15E-07	NC	-0.924226143	0.117515397	NC
TRINITY_DN412_c2_g1	-0.676126779	0.200971072	NC	0.989526078	0.03369923	NC	1.656118954	0.000235352	UP
TRINITY_DN1797_c5_g1	-1.451596965	0.001207199	DOWN	-1.329030121	0.003185633	DOWN	0.11319236	1	NC	LBD33_ARATH	LOB domain-containing protein 33
TRINITY_DN16063_c0_g1	2.0220763	2.63E-06	UP	1.290120616	0.004244729	UP	-0.741558022	0.28992135	NC	ARG7_VIGRR	Indole-3-acetic acid-induced protein ARG7
TRINITY_DN6722_c0_g1	2.550565879	1.61E-08	UP	2.904320239	9.71E-11	UP	0.344167369	1	NC	WOX4_ARATH	WUSCHEL-related homeobox 4
TRINITY_DN5409_c0_g3	-0.367777917	0.576850681	NC	-1.069241855	0.022177853	DOWN	-0.710740302	0.355626853	NC
TRINITY_DN111_c0_g1	0.362896092	0.576371368	NC	1.508744351	0.000474377	UP	1.136592311	0.02408504	UP	RAP24_ARATH	Ethylene-responsive transcription factor RAP2-4
TRINITY_DN4893_c5_g1	-0.204779054	0.79592965	NC	0.98355369	0.037822139	NC	1.179114207	0.019359637	UP
TRINITY_DN1977_c0_g1	-1.683545077	0.000109961	DOWN	-1.635711981	0.000168135	DOWN	0.038372645	1	NC
TRINITY_DN4713_c1_g1	2.129185142	4.41E-07	UP	2.538847539	1.58E-09	UP	0.400477083	0.944920256	NC
TRINITY_DN5801_c1_g1	1.813637291	1.76E-05	UP	2.240626167	8.66E-08	UP	0.417530069	0.913521202	NC	MLP31_ARATH	MLP-like protein 31
TRINITY_DN4385_c0_g2	2.068988612	9.45E-07	UP	1.301083142	0.003075387	UP	-0.777237836	0.23670159	NC	CIA2_ARATH	Protein CHLOROPLAST IMPORT APPARATUS 2
TRINITY_DN1588_c0_g1	-1.134298442	0.012782821	DOWN	-1.611487681	0.00019558	DOWN	-0.486764867	0.79041681	NC	SUT2_STYHA	High affinity sulfate transporter 2
TRINITY_DN54961_c0_g1	10.3240589	1.49E-26	UP	0	1	NC	-10.74276245	3.40E-34	DOWN
TRINITY_DN3214_c0_g1	3.916815489	3.44E-17	UP	4.112812164	7.92E-19	UP	0.186375362	1	NC	DYL_DICDI	Dynein light chain, cytoplasmic
TRINITY_DN6533_c0_g1	-0.235133271	0.757905394	NC	-1.087467482	0.021196419	DOWN	-0.861526438	0.171015201	NC
TRINITY_DN1753_c0_g2	0	1	NC	5.070387813	2.77E-23	UP	12.11631398	2.29E-45	UP
TRINITY_DN20927_c0_g2	2.253001188	2.61E-06	UP	-0.148076506	0.883925632	NC	-2.413967106	1.59E-07	DOWN
TRINITY_DN146011_c0_g1	10.15725802	2.76E-25	UP	0	1	NC	-10.57585578	7.58E-33	DOWN	COTL1_HUMAN	Coactosin-like protein
TRINITY_DN3717_c0_g1	0.793278433	0.135808476	NC	1.409132204	0.002232478	UP	0.606577403	0.545904786	NC	C81E1_GLYEC	Isoflavone 2'-hydroxylase
TRINITY_DN4804_c0_g1	10.77091231	5.62E-30	UP	12.22069962	2.82E-41	UP	1.406248786	0.002818015	UP	RL7A_TAKRU	60S ribosomal protein L7a
TRINITY_DN36364_c0_g2	9.161276398	4.82E-18	NC	10.70577041	7.20E-29	UP	1.500260079	0.001609444	UP	H4_CANGA	Histone H4
TRINITY_DN3068_c0_g1	-1.04457065	0.024550723	DOWN	-0.563755263	0.309426289	NC	0.472193799	0.815666498	NC	Y1141_ARATH	G-type lectin S-receptor-like serine/threonine-protein kinase At1g11410
TRINITY_DN6981_c0_g1	10.43182397	2.16E-27	UP	0	1	NC	-3.570179603	2.82E-14	DOWN	YFMJ_BACSU	Putative NADP-dependent oxidoreductase YfmJ
TRINITY_DN8677_c0_g1	8.52228912	1.05E-14	NC	11.82651535	5.05E-38	UP	3.26113509	2.15E-13	UP	GLNA_FUSSH	Glutamine synthetase
TRINITY_DN7580_c0_g1	2.30451322	1.44E-07	UP	2.381005674	5.39E-08	UP	0.066978629	1	NC	PMAT2_ARATH	Phenolic glucoside malonyltransferase 2
TRINITY_DN12837_c1_g1	-1.288837194	0.006377041	NC	0.119959985	0.89198763	NC	1.40020108	0.004511354	UP	FRS5_ARATH	Protein FAR1-RELATED SEQUENCE 5
TRINITY_DN13834_c0_g1	8.603256379	3.36E-15	NC	11.07554514	7.54E-32	UP	2.429369206	4.77E-08	UP	UAPA_EMENI	Uric acid-xanthine permease
TRINITY_DN6206_c0_g1	2.622011432	2.12E-08	UP	2.929331226	2.80E-10	UP	0.297411243	1	NC	MS5L2_ARATH	Protein POLLENLESS 3-LIKE 2 {ECO:0000303|Ref.5}
TRINITY_DN13924_c0_g1	1.849000734	3.54E-05	UP	2.584749451	4.01E-09	UP	0.726237055	0.317514676	NC	DOF54_ARATH	Dof zinc finger protein DOF5.4
TRINITY_DN7815_c0_g1	1.641715417	0.000433561	UP	1.930147928	2.16E-05	UP	0.279451343	1	NC
TRINITY_DN8574_c0_g1	1.206835537	0.007545594	UP	0.630032092	0.245431048	NC	-0.58642201	0.563971965	NC
TRINITY_DN14792_c0_g1	-0.795595409	0.109473255	NC	-1.258800312	0.004714542	DOWN	-0.472613078	0.813247727	NC	NU98A_ARATH	Nuclear pore complex protein NUP98A {ECO:0000303|PubMed:21189294}
TRINITY_DN5935_c0_g1	-0.741610775	0.154185342	NC	-1.013305849	0.032081454	DOWN	-0.28149563	1	NC
TRINITY_DN7246_c0_g1	1.062784968	0.043268996	NC	2.220797291	1.09E-06	UP	1.148920673	0.027196283	UP	WRK53_ARATH	Probable WRKY transcription factor 53
TRINITY_DN2710_c0_g1	1.637350913	0.00028674	UP	1.682442699	0.000173195	UP	0.03548856	1	NC	EXP15_ARATH	Expansin-A15
TRINITY_DN4666_c2_g1	3.032645829	1.36E-10	UP	3.406261815	4.69E-13	UP	0.363926223	1	NC	MS5L2_ARATH	Protein POLLENLESS 3-LIKE 2 {ECO:0000303|Ref.5}
TRINITY_DN8240_c0_g1	10.19412613	1.45E-25	UP	11.74564295	2.38E-37	UP	1.507630105	0.001196406	UP	DRE1_CAEEL	F-box protein dre-1 {ECO:0000305}
TRINITY_DN1574_c0_g3	10.9510126	1.58E-30	UP	10.5949992	5.19E-28	UP	-0.400708332	0.957681787	NC	CYP1_SOYBN	Peptidyl-prolyl cis-trans isomerase 1 {ECO:0000250|UniProtKB:O49886}
TRINITY_DN426_c1_g2	1.24073144	0.009063542	UP	0.701295255	0.21639597	NC	-0.548200011	0.676634618	NC	RPS2_ARATH	Disease resistance protein RPS2
TRINITY_DN8244_c0_g1	1.689016776	0.000111107	UP	2.557237797	2.23E-09	UP	0.858502591	0.154231816	NC	ICI_LINUS	Proteinase inhibitor
TRINITY_DN5152_c0_g2	2.356349349	1.97E-08	UP	2.484846902	3.06E-09	UP	0.119205182	1	NC
TRINITY_DN8005_c0_g1	-1.073561162	0.018259277	DOWN	-1.104795294	0.014187291	DOWN	-0.040745731	1	NC	Y4370_ARATH	DUF21 domain-containing protein At4g33700
TRINITY_DN6907_c0_g1	-1.867564787	1.02E-05	DOWN	-1.993978956	2.19E-06	DOWN	-0.135866375	1	NC	SRK2J_ARATH	Serine/threonine-protein kinase SRK2J
TRINITY_DN7332_c0_g1	0.603822591	0.302832483	NC	1.726695701	0.00010566	UP	1.113182024	0.03470473	UP	CTDSL_CHICK	CTD small phosphatase-like protein
TRINITY_DN28379_c1_g1	0	1	NC	10.71130471	6.58E-29	UP	4.215265464	2.26E-18	UP	RL28E_SCHPO	Probable 60S ribosomal protein L28e
TRINITY_DN2449_c1_g3	0.659125272	0.225540887	NC	1.399372861	0.001685249	UP	0.730526378	0.31386688	NC
TRINITY_DN11065_c0_g1	1.035732947	0.024266577	UP	0.696830503	0.175470418	NC	-0.348408153	1	NC
TRINITY_DN1017_c0_g1	1.066353369	0.022899547	UP	0.862625133	0.080077472	NC	-0.213057355	1	NC
TRINITY_DN131_c3_g1	-0.660965195	0.213555933	NC	-1.355713098	0.002326012	DOWN	-0.703899839	0.367962532	NC
TRINITY_DN9706_c0_g1	-1.672897864	8.68E-05	DOWN	-1.798630374	2.13E-05	DOWN	-0.134864495	1	NC
TRINITY_DN2526_c0_g1	1.663072958	0.000103209	UP	1.135122235	0.011879798	UP	-0.53763939	0.662038246	NC	TCP20_ARATH	Transcription factor TCP20
TRINITY_DN15_c3_g1	2.247037565	2.97E-06	UP	2.033476727	2.53E-05	NC	-0.224874592	1	NC
TRINITY_DN52893_c0_g1	-2.698920004	5.10E-10	DOWN	-0.990488733	0.034757356	NC	1.699876296	0.000234532	UP
TRINITY_DN5475_c0_g2	10.53248821	3.71E-28	UP	0	1	NC	-10.95092656	7.48E-36	DOWN	RL6_TETTS	60S ribosomal protein L6
TRINITY_DN15987_c0_g1	-1.102103318	0.018261714	DOWN	-0.820531571	0.099324518	NC	0.270944265	1	NC
TRINITY_DN1824_c0_g1	-1.060839089	0.019646606	DOWN	-1.646110191	0.000107863	DOWN	-0.594850354	0.541081357	NC	BAHL2_ORYSI	Probable E3 ubiquitin-protein ligase BAH1-like 1
TRINITY_DN10616_c0_g1	1.632698276	0.000405712	UP	1.527426288	0.001008387	UP	-0.114991706	1	NC	DRL16_ARATH	Probable disease resistance protein At1g61190
TRINITY_DN4522_c1_g1	-0.9495773	0.042075454	NC	-1.026792566	0.024370279	DOWN	-0.086735285	1	NC
TRINITY_DN1239_c1_g1	4.592499794	1.60E-16	NC	5.461991618	4.87E-23	UP	0.859290015	0.165696125	NC	LAC7_ARATH	Laccase-7
TRINITY_DN20566_c0_g3	8.96361839	1.07E-16	NC	11.56407173	7.46E-36	UP	2.557484201	6.42E-09	UP	TAL1_FUSO4	Transaldolase
TRINITY_DN255_c0_g1	1.26885722	0.00405745	UP	1.038660089	0.023095065	UP	-0.239649426	1	NC
TRINITY_DN3204_c0_g1	1.735897535	5.12E-05	UP	1.525919421	0.000429319	UP	-0.219706447	1	NC
TRINITY_DN8877_c0_g1	2.829510612	4.79E-09	NC	3.046480658	2.66E-10	UP	0.206876484	1	NC	NACK1_TOBAC	Kinesin-like protein NACK1
TRINITY_DN7606_c0_g1	-1.122634491	0.01579499	DOWN	-1.698859848	0.000108928	DOWN	-0.585267931	0.602614346	NC	BGAL6_ARATH	Beta-galactosidase 6
TRINITY_DN8750_c0_g2	0	1	NC	10.65370663	1.84E-28	UP	3.963155928	1.12E-16	UP	HMP_DEIRA	Flavohemoprotein {ECO:0000255|HAMAP-Rule:MF_01252}
TRINITY_DN16727_c0_g1	-1.365590992	0.002749065	DOWN	-0.678780851	0.208198564	NC	0.677728148	0.426629813	NC
TRINITY_DN11494_c0_g1	-0.381278638	0.571866888	NC	0.841517647	0.098720636	NC	1.21433828	0.016498681	UP
TRINITY_DN8885_c0_g1	-1.99725251	2.32E-06	DOWN	-1.952967762	3.72E-06	DOWN	0.035068862	1	NC	Y1061_ARATH	Probably inactive leucine-rich repeat receptor-like protein kinase At1g50610
TRINITY_DN2502_c1_g1	-0.845469355	0.079852234	NC	-1.276189392	0.003638115	DOWN	-0.44018887	0.866912767	NC	CPR30_ARATH	F-box protein CPR30
TRINITY_DN72698_c1_g1	-2.414951858	2.03E-08	DOWN	-1.516196905	0.000522781	DOWN	0.88978393	0.148914083	NC
TRINITY_DN115276_c0_g1	1.47430164	0.000655875	UP	0.935126981	0.046627364	NC	-0.548288538	0.637718477	NC
TRINITY_DN31774_c0_g1	5.204497362	4.90E-17	NC	5.457239828	7.88E-19	UP	0.241876061	1	NC
TRINITY_DN10714_c0_g1	1.171792978	0.010718009	UP	0.80196623	0.110806722	NC	-0.379805408	0.992044181	NC
TRINITY_DN6817_c0_g1	1.052689693	0.035111677	UP	1.308817462	0.005617764	UP	0.246461142	1	NC
TRINITY_DN6383_c0_g1	2.285126232	7.92E-08	UP	2.462117215	6.69E-09	UP	0.167669612	1	NC
TRINITY_DN9519_c0_g1	-1.816882891	1.87E-05	DOWN	-1.069439836	0.018460054	DOWN	0.737805456	0.295968606	NC
TRINITY_DN23120_c0_g2	0	1	NC	10.54546351	1.28E-27	UP	3.317039098	8.34E-13	UP	DEGS2_CAEEL	Putative sphingolipid delta(4)-desaturase/C4-hydroxylase
TRINITY_DN8799_c0_g1	1.814207062	0.000108737	UP	1.538081613	0.001328844	NC	-0.286094361	1	NC	CP26B_ARATH	Peptidyl-prolyl cis-trans isomerase CYP26-2, chloroplastic
TRINITY_DN520_c0_g2	-2.265349753	1.41E-07	DOWN	-2.063999642	1.48E-06	DOWN	0.191499335	1	NC	Y1491_ARATH	Uncharacterized protein At1g04910
TRINITY_DN3318_c0_g3	-0.648280785	0.216304674	NC	-2.457719907	4.86E-09	DOWN	-1.819036167	3.78E-05	DOWN
TRINITY_DN8167_c0_g1	4.56552428	2.75E-20	UP	5.376678586	7.81E-27	UP	0.80066592	0.216543245	NC	Y1814_ARATH	Uncharacterized methyltransferase At1g78140, chloroplastic
TRINITY_DN24506_c0_g1	10.54023258	3.36E-28	UP	0	1	NC	-6.591122934	7.71E-29	DOWN	ACTP_ACACA	Actophorin
TRINITY_DN68_c2_g1	1.018981062	0.039345017	UP	0.658446936	0.245475557	NC	-0.370203891	1	NC	QRT3_ARATH	Polygalacturonase QRT3
TRINITY_DN8920_c0_g1	-1.517929803	0.000400181	DOWN	-3.353986268	3.61E-15	DOWN	-1.845356137	2.65E-05	DOWN
TRINITY_DN12427_c0_g1	-1.931823264	7.51E-06	DOWN	-2.378124666	3.04E-08	DOWN	-0.456318928	0.867468912	NC
TRINITY_DN323_c0_g1	0.005121907	0.997502237	NC	1.229183369	0.005395499	UP	1.214633217	0.013046281	UP	EF105_ARATH	Ethylene-responsive transcription factor ERF105
TRINITY_DN3973_c0_g1	1.793626029	0.000100105	UP	0.736904865	0.200851978	NC	-1.066713259	0.051438078	NC	PP301_ARATH	Pentatricopeptide repeat-containing protein At4g02750
TRINITY_DN16417_c0_g1	0.3880957	0.553069176	NC	1.313355992	0.003472188	UP	0.915849447	0.114975789	NC
TRINITY_DN37516_c0_g1	1.751853775	3.94E-05	UP	1.659349843	0.000103133	UP	-0.101760703	1	NC	STOP1_ARATH	Protein SENSITIVE TO PROTON RHIZOTOXICITY 1
TRINITY_DN1967_c0_g1	0	1	NC	7.912341172	1.55E-26	UP	5.523743026	1.46E-24	UP	NB5R1_ARATH	NADH--cytochrome b5 reductase 1
TRINITY_DN9796_c0_g1	4.197529823	3.08E-14	NC	4.931017258	1.71E-19	UP	0.72317074	0.340460787	NC	AB20G_ARATH	ABC transporter G family member 20
TRINITY_DN8836_c0_g1	7.088727039	6.24E-08	NC	11.09740027	5.00E-32	UP	3.967471668	1.99E-17	UP	HMP_BORPA	Flavohemoprotein {ECO:0000255|HAMAP-Rule:MF_01252}
TRINITY_DN2806_c0_g1	-0.345367911	0.608270362	NC	0.719737333	0.171624315	NC	1.055793479	0.048597191	UP	APK1B_ARATH	Protein kinase APK1B, chloroplastic
TRINITY_DN11322_c0_g1	7.448794097	8.83E-09	NC	10.41956488	1.21E-26	UP	2.930677588	1.29E-10	UP
TRINITY_DN8192_c0_g1	-1.706495874	6.14E-05	DOWN	-1.950668646	3.71E-06	DOWN	-0.253792394	1	NC
TRINITY_DN5242_c0_g1	1.446866171	0.000783731	UP	1.398861786	0.001187861	UP	-0.057418142	1	NC	PSBQ2_ARATH	Oxygen-evolving enhancer protein 3-2, chloroplastic
TRINITY_DN10788_c0_g1	0.986575623	0.03970372	NC	1.00461299	0.03452344	UP	0.009674861	1	NC	R13L1_ARATH	Putative disease resistance RPP13-like protein 1
TRINITY_DN19918_c0_g1	3.471064415	1.48E-14	UP	4.045317056	7.76E-19	UP	0.564686614	0.607492255	NC
TRINITY_DN11224_c0_g1	9.526688922	1.27E-20	NC	11.60373894	3.51E-36	UP	2.033485228	4.70E-06	UP	RL24_NEUCR	60S ribosomal protein L24
TRINITY_DN3385_c0_g2	0.105359808	0.907021154	NC	1.343649797	0.002495666	UP	1.229196852	0.012648882	UP	ATL6_ARATH	E3 ubiquitin-protein ligase ATL6
TRINITY_DN9651_c0_g1	0	1	NC	6.120127746	3.03E-28	UP	12.11570896	2.29E-45	UP
TRINITY_DN4353_c0_g1	-0.559778481	0.310607548	NC	-1.00287675	0.029489569	DOWN	-0.452311803	0.841665977	NC	RH33_ARATH	Putative DEAD-box ATP-dependent RNA helicase 33
TRINITY_DN7421_c0_g2	-0.623982927	0.24024761	NC	-1.338826183	0.002145329	DOWN	-0.723963532	0.311448041	NC
TRINITY_DN7014_c0_g1	1.213375481	0.010570272	UP	1.35087348	0.003460699	UP	0.127636661	1	NC
TRINITY_DN602_c0_g1	-0.435452018	0.468091763	NC	-1.120129656	0.012413366	DOWN	-0.694152003	0.356511355	NC
TRINITY_DN2161_c0_g1	-0.424839911	0.505752035	NC	1.046436195	0.029662382	UP	1.461522787	0.001993722	UP
TRINITY_DN2815_c0_g2	-1.009317444	0.028733254	DOWN	-1.312367236	0.002740711	DOWN	-0.312457797	1	NC	GAM1_ORYSJ	Transcription factor GAMYB
TRINITY_DN3425_c0_g1	1.077268608	0.021917019	UP	1.145288407	0.013166285	UP	0.058591421	1	NC	R13L1_ARATH	Putative disease resistance RPP13-like protein 1
TRINITY_DN318_c0_g2	1.61751285	0.000229149	UP	1.370109429	0.002203101	UP	-0.256878398	1	NC
TRINITY_DN7769_c0_g1	0.994361024	0.056818275	NC	1.340138199	0.005535436	UP	0.336887209	1	NC	PSB5B_ARATH	Proteasome subunit beta type-5-B
TRINITY_DN39664_c0_g1	1.566006445	0.000430601	UP	0.26702985	0.729993994	NC	-1.309008804	0.007176047	DOWN
TRINITY_DN896_c3_g1	1.037762585	0.028199202	UP	1.090128029	0.019245048	UP	0.042159065	1	NC
TRINITY_DN3712_c0_g1	2.748708387	3.39E-10	UP	1.841397396	3.41E-05	UP	-0.917395224	0.113108463	NC	CRK2_ARATH	Cysteine-rich receptor-like protein kinase 2
TRINITY_DN6010_c0_g1	1.023019532	0.025400403	UP	0.689070129	0.177995625	NC	-0.343199733	1	NC	PEXLP_TOBAC	Pistil-specific extensin-like protein
TRINITY_DN9797_c0_g1	2.297981873	5.40E-07	UP	1.112369722	0.032338882	NC	-1.195880049	0.020190989	DOWN	GANAB_MACFA	Neutral alpha-glucosidase AB
TRINITY_DN9589_c0_g1	1.523488533	0.001466797	UP	2.429127415	6.95E-08	UP	0.89637423	0.134827248	NC	KNAT6_ARATH	Homeobox protein knotted-1-like 6
TRINITY_DN6742_c0_g2	0.608899792	0.256629419	NC	1.011838097	0.027347564	UP	0.393391207	0.958972135	NC	GAE2_ARATH	UDP-glucuronate 4-epimerase 2
TRINITY_DN317_c2_g2	1.59491019	0.000246923	UP	1.508206473	0.000547458	UP	-0.096310404	1	NC
TRINITY_DN11387_c0_g1	-1.231364073	0.006574137	DOWN	-1.842477734	2.05E-05	DOWN	-0.621607314	0.518731018	NC
TRINITY_DN4053_c0_g1	-8.953790388	3.46E-58	DOWN	-5.332050727	1.21E-30	DOWN	3.614957068	7.30E-15	UP
TRINITY_DN87588_c1_g1	0.32284707	0.62522574	NC	-3.333101527	5.11E-15	DOWN	-3.666129466	3.84E-17	DOWN
TRINITY_DN7755_c0_g2	8.554395044	6.39E-15	NC	11.03712353	1.54E-31	UP	2.439673946	4.45E-08	UP	HSP75_ZYGRC	Heat shock protein SSB
TRINITY_DN8887_c0_g1	-1.110059021	0.013945687	DOWN	-0.123987227	0.879033618	NC	0.976682669	0.07407575	NC
TRINITY_DN12567_c0_g1	-1.345079248	0.002434557	DOWN	-1.962503761	4.73E-06	DOWN	-0.62759342	0.503057069	NC
TRINITY_DN5815_c1_g1	11.14683487	4.37E-32	UP	12.18447112	5.56E-41	UP	0.993571408	0.069216712	NC	RL40_DROME	Ubiquitin-60S ribosomal protein L40
TRINITY_DN8520_c0_g1	-0.573712547	0.293923049	NC	-1.35518586	0.001842169	DOWN	-0.791345446	0.221147099	NC
TRINITY_DN11148_c0_g1	-4.11592686	4.14E-19	DOWN	-4.288563709	1.69E-20	DOWN	-0.182517253	1	NC
TRINITY_DN20084_c0_g2	-1.378523822	0.002453161	DOWN	-0.707236403	0.181951097	NC	0.661399308	0.455458353	NC
TRINITY_DN4765_c0_g1	1.155774045	0.014570268	UP	1.042506398	0.031322373	UP	-0.12257426	1	NC	MTAD_CLOTH	5-methylthioadenosine/S-adenosylhomocysteine deaminase {ECO:0000255|HAMAP-Rule:MF_01281}
TRINITY_DN1590_c1_g1	0.939826017	0.045221891	NC	1.161274662	0.009211395	UP	0.211979197	1	NC
TRINITY_DN2349_c0_g1	-0.931545863	0.051308487	NC	-1.462647451	0.000881386	DOWN	-0.540346689	0.677338246	NC
TRINITY_DN14614_c1_g1	2.068014596	1.64E-06	UP	0.991749415	0.039325739	NC	-1.084768016	0.036611572	DOWN	Y1341_ARATH	Probable LRR receptor-like serine/threonine-protein kinase At1g34110
TRINITY_DN6021_c1_g1	1.165437696	0.00916725	UP	0.970817363	0.036166093	NC	-0.203665916	1	NC
TRINITY_DN2050_c0_g1	1.076414407	0.017462978	UP	0.706567257	0.163897855	NC	-0.379620957	0.983364679	NC	DNAJ8_ARATH	Chaperone protein dnaJ 8, chloroplastic
TRINITY_DN10352_c0_g1	1.104727888	0.014613988	UP	0.751550404	0.132342574	NC	-0.362652915	1	NC	DNJ11_ARATH	Chaperone protein dnaJ 11, chloroplastic
TRINITY_DN671_c0_g1	3.473250827	7.82E-16	UP	2.537048499	1.87E-09	UP	-0.945409273	0.089260481	NC	SRG1_ARATH	Protein SRG1
TRINITY_DN6537_c0_g1	-2.565207963	3.32E-09	DOWN	-0.621703494	0.252621421	NC	1.934533839	1.84E-05	UP
TRINITY_DN1848_c0_g1	11.15533022	2.05E-60	UP	11.2131017	8.54E-61	UP	0.045125888	1	NC
TRINITY_DN3685_c0_g1	0.703460246	0.171843863	NC	1.504001715	0.000483687	UP	0.789865642	0.222551491	NC
TRINITY_DN197_c0_g6	-2.370557469	2.17E-08	DOWN	-0.564546064	0.305070274	NC	1.796695268	5.40E-05	UP	NAC72_ARATH	NAC domain-containing protein 72
TRINITY_DN2295_c0_g1	1.142473867	0.011041944	UP	1.168288084	0.008822511	UP	0.016203918	1	NC	TGA1_ARATH	Transcription factor TGA1
TRINITY_DN52010_c0_g1	5.734283742	5.31E-32	UP	5.806697354	5.25E-33	UP	0.062503542	1	NC	PERN1_TOBAC	Peroxidase N1
TRINITY_DN7496_c0_g1	-0.015720795	0.986341951	NC	-1.809000883	4.31E-05	DOWN	-1.802914581	8.24E-05	DOWN	NAMB2_TRITD	NAC transcription factor NAM-B2
TRINITY_DN5396_c0_g1	-1.514964841	0.00051943	DOWN	-1.298572309	0.003472188	DOWN	0.206893215	1	NC
TRINITY_DN1474_c0_g1	-1.363947795	0.001745101	DOWN	-1.358251795	0.001784089	DOWN	-0.003722397	1	NC
TRINITY_DN9604_c0_g1	10.92704989	2.45E-30	UP	12.91561828	6.50E-47	UP	1.944813581	9.36E-06	UP	RS23_NEUCR	40S ribosomal protein S23
TRINITY_DN644_c2_g1	5.035812891	2.12E-19	UP	4.735169338	1.60E-17	UP	-0.311161539	1	NC	ARSB_DICDI	Putative transporter arsB
TRINITY_DN40773_c0_g1	0	1	NC	10.40351871	1.70E-26	UP	10.77761883	1.69E-34	UP	RS15_PODAS	40S ribosomal protein S15
TRINITY_DN9485_c0_g1	0.774838782	0.150780618	NC	1.421532329	0.001801749	UP	0.638176308	0.475585448	NC	FB290_ARATH	F-box protein At5g51380
TRINITY_DN80635_c0_g1	0.354939429	0.655145269	NC	1.048579089	0.0417391	UP	0.686400991	0.424498553	NC	M1250_ARATH	Uncharacterized mitochondrial protein AtMg01250
TRINITY_DN5346_c0_g1	-2.343531613	2.22E-08	DOWN	-2.011975416	1.58E-06	DOWN	0.322092466	1	NC	ML423_ARATH	MLP-like protein 423
TRINITY_DN7325_c0_g1	1.111177732	0.01373615	UP	1.197166194	0.006904702	UP	0.076408398	1	NC	NTF6_TOBAC	Mitogen-activated protein kinase homolog NTF6
TRINITY_DN1060_c3_g1	1.866664617	1.53E-05	UP	1.331013283	0.002916692	UP	-0.544957268	0.651719478	NC	RUBR_SYNY3	Rubredoxin
TRINITY_DN5096_c0_g2	-10.72625319	9.69E-33	DOWN	-6.952126307	7.06E-31	DOWN	0	1	NC
TRINITY_DN11402_c0_g2	0	1	NC	10.25904263	3.01E-26	UP	4.141606879	1.33E-17	UP	EF3_CANAL	Elongation factor 3
TRINITY_DN6713_c0_g1	3.051566822	1.80E-12	UP	1.6101471	0.000255324	UP	-1.451316356	0.001766845	DOWN	UBQ11_ARATH	Polyubiquitin 11
TRINITY_DN1486_c0_g4	1.149726937	0.016915711	UP	0.896989753	0.083829035	NC	-0.263081349	1	NC
TRINITY_DN6481_c0_g1	1.125564995	0.012111195	UP	0.715333986	0.156844336	NC	-0.419670732	0.909669413	NC	FER_DATME	Ferredoxin
TRINITY_DN20516_c0_g2	0	1	NC	4.684134896	1.03E-16	UP	2.576027299	2.97E-08	UP
TRINITY_DN11802_c0_g2	0.559303552	0.33726382	NC	1.219785945	0.007703823	UP	0.650104554	0.448882104	NC
TRINITY_DN3273_c0_g3	-2.881898502	3.67E-11	DOWN	-0.881878217	0.067270162	NC	1.99021327	1.08E-05	UP	PULR_MENPI	(+)-pulegone reductase
[truncated: 3,482 more rows]
