# Supplementary material for: De novo Transcriptome Reveals Gene Changes in the Development of the Endosperm Chalazal Haustorium in Taxillus chinensis (DC.) Danser
Source: Biomed Res Int. 2020 Feb 18;2020:7871918. doi: 10.1155/2020/7871918 (PMC7053452; doi:10.1155/2020/7871918)
Supplement: Supplementary 3 — Table S3: forward and reverse primers used in the qRT-PCR experiment. [file 7871918.f3.xlsx]

## Sheet: Sheet1
Supplementary Table S3. Farward and reverse primer sequences used in the qRT-PCR experiment.
Target_gene	Farward	Reverse	TM (°C)
18s rRNA	CAACCATAAACGATGCCGA	AGCCTTGCGACCATACTCC	58
TRINITY_DN10066_c0_g1	TGATTTCTCCCTCTTTCTC	TGTGATTCCAACCTTCTT	58
TRINITY_DN12554_c1_g1	GATTCAGGATAAGGAAGGA	TTGTAGTCAGAGAGGGTA	58
TRINITY_DN2024_c3_g1	GGATTGAGAAGAATGGTAG	GATTGTTGAATAATGGTGTT	58
TRINITY_DN2307_c2_g1	AACCACCATCATCATCAC	TACTGTTGTTGTTGCTTTG	58
TRINITY_DN3842_c0_g2	GATGTTCTCACTTCTACGA	ATCTCAGCCTCTCATTATG	58
TRINITY_DN6353_c3_g1	AAAGACACGGAAAGAAAGA	AGATGCGGAGTTAATGAC	58
TRINITY_DN6903_c0_g1	GGCGGTGGATTAGGAAAC	GAAGGAACGACTCAAGACAT	58
TRINITY_DN7338_c0_g1	ACCTCAACCTTCCTCCTTCC	GCGTAAGAGTACCACATAACAAGT	58
TRINITY_DN759_c0_g2	CCGTATCCGTGGTCTCTC	AAATAGTTAGTGGGCTCATCAAG	58
